# Supplementary material
Source: PubMed Central journal article supplement (PMC4974544)
Supplement: JOA-229-422-s002.pdf [file JOA-229-422-s002.pdf]

New Procrustes fit:  
Dataset 'Tragulidae'

686 landmarks in 3 dimensions.

The dataset contains 25 observations, of which 25 are included for analyses.

Average shape:

| Lmk. | Axis 1 (x) | Axis 2 (y)  | Axis 3 (z)  |
|------|------------|-------------|-------------|
| 1    | 0.04060870 | -0.00978713 | 0.02302929  |
| 2    | 0.02411490 | -0.02857323 | -0.01097360 |
| 3    | 0.02532192 | -0.02950389 | -0.01274487 |
| 4    | 0.02701152 | -0.03066658 | -0.01381228 |
| 5    | 0.02885205 | -0.03174885 | -0.01436320 |
| 6    | 0.03081039 | -0.03275590 | -0.01452812 |
| 7    | 0.03292517 | -0.03372307 | -0.01433549 |
| 8    | 0.03524159 | -0.03467231 | -0.01377739 |
| 9    | 0.03775644 | -0.03560689 | -0.01285429 |
| 10   | 0.04045437 | -0.03649851 | -0.01148219 |
| 11   | 0.04323132 | -0.03729305 | -0.00952479 |
| 12   | 0.04580185 | -0.03798775 | -0.00718089 |
| 13   | 0.04798839 | -0.03822812 | -0.00465762 |
| 14   | 0.04972066 | -0.03813132 | -0.00201339 |
| 15   | 0.05110787 | -0.03771563 | 0.00071403  |
| 16   | 0.05211829 | -0.03701553 | 0.00335126  |
| 17   | 0.05278640 | -0.03598268 | 0.00612667  |
| 18   | 0.05321055 | -0.03461229 | 0.00908166  |
| 19   | 0.05317941 | -0.03291032 | 0.01205002  |
| 20   | 0.05269557 | -0.03088091 | 0.01506658  |
| 21   | 0.05162220 | -0.02794943 | 0.01800478  |
| 22   | 0.04997155 | -0.02514434 | 0.02027460  |
| 23   | 0.04782744 | -0.02249036 | 0.02189882  |
| 24   | 0.04523302 | -0.01995186 | 0.02289614  |
| 25   | 0.04216057 | -0.01754223 | 0.02324268  |
| 26   | 0.03856948 | -0.01530477 | 0.02290146  |
| 27   | 0.03454941 | -0.01313855 | 0.02192790  |
| 28   | 0.03010305 | -0.01086273 | 0.02043753  |
| 29   | 0.02514858 | -0.00881919 | 0.01824965  |
| 30   | 0.02314437 | -0.00784093 | 0.01679154  |
| 31   | 0.02144170 | -0.00725719 | 0.01528040  |
| 32   | 0.02010609 | -0.00723262 | 0.01367119  |
| 33   | 0.01920388 | -0.00778121 | 0.01199094  |
| 34   | 0.01866515 | -0.00880436 | 0.01024620  |
| 35   | 0.01848449 | -0.01033184 | 0.00842769  |
| 36   | 0.01854021 | -0.01229660 | 0.00647369  |
| 37   | 0.01883708 | -0.01475311 | 0.00432714  |
| 38   | 0.01976002 | -0.01775676 | 0.00232015  |
| 39   | 0.02098720 | -0.01951798 | 0.00176218  |
| 40   | 0.02225705 | -0.02118725 | 0.00120577  |
| 41   | 0.02324959 | -0.02269615 | 0.00029338  |
| 42   | 0.02396325 | -0.02404452 | -0.00091886 |
| 43   | 0.02443451 | -0.02523652 | -0.00240309 |
| 44   | 0.02466456 | -0.02629330 | -0.00415310 |
| 45   | 0.02458003 | -0.02714476 | -0.00624008 |
| 46   | 0.02422212 | -0.02774036 | -0.00865545 |
| 47   | 0.01796991 | -0.02801903 | -0.01535618 |
| 48   | 0.02001458 | -0.02929610 | -0.01683032 |
| 49   | 0.02228292 | -0.03048788 | -0.01779980 |

|     |            |             |             |
|-----|------------|-------------|-------------|
| 50  | 0.02464474 | -0.03158826 | -0.01834011 |
| 51  | 0.02704513 | -0.03270844 | -0.01862466 |
| 52  | 0.02950180 | -0.03374859 | -0.01856220 |
| 53  | 0.03203387 | -0.03477001 | -0.01818850 |
| 54  | 0.03464035 | -0.03574004 | -0.01746816 |
| 55  | 0.03733033 | -0.03670049 | -0.01642740 |
| 56  | 0.04009157 | -0.03758910 | -0.01501078 |
| 57  | 0.04202160 | -0.03822486 | -0.01378204 |
| 58  | 0.04384326 | -0.03872070 | -0.01241910 |
| 59  | 0.04555723 | -0.03912763 | -0.01095693 |
| 60  | 0.04717801 | -0.03944307 | -0.00939133 |
| 61  | 0.04870046 | -0.03966045 | -0.00770676 |
| 62  | 0.05013050 | -0.03977788 | -0.00589141 |
| 63  | 0.05143518 | -0.03974732 | -0.00392757 |
| 64  | 0.05263597 | -0.03960834 | -0.00183331 |
| 65  | 0.05364137 | -0.03923378 | 0.00040392  |
| 66  | 0.05444096 | -0.03875427 | 0.00257079  |
| 67  | 0.05504596 | -0.03810156 | 0.00468216  |
| 68  | 0.05549540 | -0.03734056 | 0.00672340  |
| 69  | 0.05581101 | -0.03647712 | 0.00870252  |
| 70  | 0.05595306 | -0.03549718 | 0.01060984  |
| 71  | 0.05600178 | -0.03443826 | 0.01247434  |
| 72  | 0.05587784 | -0.03325004 | 0.01427021  |
| 73  | 0.05561696 | -0.03194930 | 0.01600100  |
| 74  | 0.05517498 | -0.03051236 | 0.01764114  |
| 75  | 0.05452931 | -0.02854315 | 0.01960976  |
| 76  | 0.05354622 | -0.02652114 | 0.02132998  |
| 77  | 0.05225089 | -0.02439378 | 0.02287914  |
| 78  | 0.05056123 | -0.02215558 | 0.02414677  |
| 79  | 0.04849505 | -0.01979033 | 0.02511848  |
| 80  | 0.04602522 | -0.01730190 | 0.02569206  |
| 81  | 0.04321391 | -0.01469515 | 0.02596690  |
| 82  | 0.04010088 | -0.01191702 | 0.02642289  |
| 83  | 0.03659433 | -0.00911034 | 0.02637603  |
| 84  | 0.01935681 | 0.02476511  | 0.00619506  |
| 85  | 0.02030557 | 0.02599315  | 0.00447217  |
| 86  | 0.02185188 | 0.02730378  | 0.00312763  |
| 87  | 0.02372185 | 0.02835409  | 0.00213623  |
| 88  | 0.02570016 | 0.02912745  | 0.00133322  |
| 89  | 0.02775938 | 0.02972792  | 0.00062817  |
| 90  | 0.02994570 | 0.03017070  | 0.00003593  |
| 91  | 0.03228465 | 0.03050641  | -0.00049725 |
| 92  | 0.03480387 | 0.03067091  | -0.00088636 |
| 93  | 0.03749458 | 0.03061545  | -0.00108525 |
| 94  | 0.04002609 | 0.03007200  | -0.00099586 |
| 95  | 0.04255047 | 0.02957665  | -0.00093729 |
| 96  | 0.04483561 | 0.02873112  | -0.00057233 |
| 97  | 0.04692030 | 0.02765138  | 0.00002553  |
| 98  | 0.04887206 | 0.02637766  | 0.00077477  |
| 99  | 0.05070065 | 0.02488712  | 0.00168276  |
| 100 | 0.05236261 | 0.02317904  | 0.00280337  |
| 101 | 0.05387375 | 0.02121909  | 0.00410378  |
| 102 | 0.05510756 | 0.01901974  | 0.00565183  |
| 103 | 0.05635467 | 0.01524909  | 0.00812711  |
| 104 | 0.05668686 | 0.01174517  | 0.01057285  |
| 105 | 0.05626389 | 0.00865414  | 0.01287162  |
| 106 | 0.05523337 | 0.00591675  | 0.01496352  |
| 107 | 0.05365405 | 0.00345861  | 0.01685755  |
| 108 | 0.05154691 | 0.00118594  | 0.01857471  |
| 109 | 0.04873385 | -0.00078278 | 0.02014129  |

|     |            |             |             |
|-----|------------|-------------|-------------|
| 110 | 0.04515464 | -0.00228424 | 0.02155412  |
| 111 | 0.04091439 | -0.00307029 | 0.02283229  |
| 112 | 0.03597231 | -0.00319143 | 0.02227085  |
| 113 | 0.03159006 | -0.00274253 | 0.02165001  |
| 114 | 0.02782772 | -0.00185695 | 0.02099022  |
| 115 | 0.02462389 | -0.00081028 | 0.02024291  |
| 116 | 0.02196651 | 0.00051538  | 0.01940785  |
| 117 | 0.01989023 | 0.00230985  | 0.01853381  |
| 118 | 0.01845209 | 0.00456445  | 0.01760554  |
| 119 | 0.01750222 | 0.00715105  | 0.01650558  |
| 120 | 0.01728033 | 0.01008590  | 0.01564173  |
| 121 | 0.01820650 | 0.01194789  | 0.01548736  |
| 122 | 0.01923461 | 0.01378478  | 0.01535362  |
| 123 | 0.01999148 | 0.01555814  | 0.01490568  |
| 124 | 0.02051620 | 0.01725746  | 0.01417670  |
| 125 | 0.02079758 | 0.01889539  | 0.01317324  |
| 126 | 0.02084220 | 0.02048866  | 0.01190027  |
| 127 | 0.02049207 | 0.02194820  | 0.01020286  |
| 128 | 0.01977764 | 0.02326703  | 0.00813927  |
| 129 | 0.01213753 | 0.02625579  | 0.00466833  |
| 130 | 0.01357677 | 0.02779923  | 0.00351227  |
| 131 | 0.01534115 | 0.02908003  | 0.00245119  |
| 132 | 0.01730097 | 0.03014039  | 0.00148222  |
| 133 | 0.01939224 | 0.03105195  | 0.00059048  |
| 134 | 0.02161886 | 0.03180847  | -0.00022456 |
| 135 | 0.02397390 | 0.03246933  | -0.00096368 |
| 136 | 0.02647460 | 0.03301445  | -0.00163959 |
| 137 | 0.02912067 | 0.03345165  | -0.00224660 |
| 138 | 0.03191866 | 0.03372892  | -0.00276428 |
| 139 | 0.03419826 | 0.03381482  | -0.00309217 |
| 140 | 0.03644102 | 0.03364854  | -0.00327079 |
| 141 | 0.03861012 | 0.03333399  | -0.00326928 |
| 142 | 0.04073785 | 0.03289182  | -0.00316921 |
| 143 | 0.04282192 | 0.03226691  | -0.00295573 |
| 144 | 0.04484887 | 0.03152737  | -0.00260201 |
| 145 | 0.04682208 | 0.03063264  | -0.00210292 |
| 146 | 0.04877520 | 0.02959564  | -0.00150935 |
| 147 | 0.05063594 | 0.02835552  | -0.00075616 |
| 148 | 0.05259962 | 0.02679440  | 0.00022815  |
| 149 | 0.05431803 | 0.02510931  | 0.00130260  |
| 150 | 0.05580545 | 0.02333070  | 0.00247363  |
| 151 | 0.05704520 | 0.02144721  | 0.00372598  |
| 152 | 0.05801861 | 0.01947747  | 0.00508481  |
| 153 | 0.05879373 | 0.01739518  | 0.00652646  |
| 154 | 0.05937337 | 0.01517731  | 0.00804836  |
| 155 | 0.05966772 | 0.01287504  | 0.00968453  |
| 156 | 0.05959692 | 0.01044122  | 0.01137040  |
| 157 | 0.05891144 | 0.00726431  | 0.01372075  |
| 158 | 0.05778766 | 0.00432208  | 0.01591797  |
| 159 | 0.05615317 | 0.00164775  | 0.01792560  |
| 160 | 0.05408188 | -0.00077686 | 0.01977820  |
| 161 | 0.05155593 | -0.00297547 | 0.02146265  |
| 162 | 0.04848989 | -0.00486936 | 0.02290372  |
| 163 | 0.04492588 | -0.00648901 | 0.02411349  |
| 164 | 0.04104154 | -0.00794496 | 0.02540535  |
| 165 | 0.03659433 | -0.00911034 | 0.02637603  |
| 166 | 0.02477938 | -0.00767741 | -0.01754804 |
| 167 | 0.02539860 | -0.00705506 | -0.01865119 |
| 168 | 0.02615951 | -0.00613106 | -0.01955133 |
| 169 | 0.02697957 | -0.00498706 | -0.02026759 |

|     |            |             |             |
|-----|------------|-------------|-------------|
| 170 | 0.02783109 | -0.00365580 | -0.02082078 |
| 171 | 0.02871135 | -0.00214537 | -0.02123424 |
| 172 | 0.02959662 | -0.00044666 | -0.02159233 |
| 173 | 0.03049791 | 0.00145227  | -0.02188855 |
| 174 | 0.03141554 | 0.00355728  | -0.02212723 |
| 175 | 0.03238415 | 0.00584883  | -0.02215542 |
| 176 | 0.03322946 | 0.00749123  | -0.02213007 |
| 177 | 0.03406403 | 0.00906227  | -0.02188888 |
| 178 | 0.03484498 | 0.01058107  | -0.02156097 |
| 179 | 0.03560654 | 0.01203269  | -0.02107879 |
| 180 | 0.03632406 | 0.01348754  | -0.02047304 |
| 181 | 0.03701026 | 0.01481315  | -0.01972196 |
| 182 | 0.03766999 | 0.01605828  | -0.01884959 |
| 183 | 0.03830269 | 0.01736803  | -0.01782843 |
| 184 | 0.03886954 | 0.01847912  | -0.01668786 |
| 185 | 0.03942122 | 0.01984682  | -0.01528817 |
| 186 | 0.03982994 | 0.02098472  | -0.01380573 |
| 187 | 0.04010139 | 0.02193018  | -0.01223402 |
| 188 | 0.04022497 | 0.02268011  | -0.01060547 |
| 189 | 0.04023137 | 0.02323297  | -0.00889973 |
| 190 | 0.04010052 | 0.02358904  | -0.00712502 |
| 191 | 0.03985195 | 0.02380703  | -0.00526765 |
| 192 | 0.03947752 | 0.02381104  | -0.00331287 |
| 193 | 0.03895987 | 0.02357678  | -0.00128188 |
| 194 | 0.03771484 | 0.02274172  | 0.00203462  |
| 195 | 0.03625565 | 0.02148474  | 0.00475694  |
| 196 | 0.03467759 | 0.02004308  | 0.00698509  |
| 197 | 0.03293912 | 0.01837210  | 0.00866618  |
| 198 | 0.03105116 | 0.01659553  | 0.00992894  |
| 199 | 0.02898778 | 0.01459870  | 0.01071910  |
| 200 | 0.02677263 | 0.01237791  | 0.01101118  |
| 201 | 0.02440437 | 0.00993652  | 0.01073220  |
| 202 | 0.02196177 | 0.00727930  | 0.00976559  |
| 203 | 0.02108661 | 0.00523108  | 0.00895700  |
| 204 | 0.02037878 | 0.00329527  | 0.00796442  |
| 205 | 0.02000687 | 0.00144535  | 0.00678589  |
| 206 | 0.01975444 | -0.00027387 | 0.00557381  |
| 207 | 0.01950643 | -0.00184009 | 0.00426571  |
| 208 | 0.01935080 | -0.00329076 | 0.00283627  |
| 209 | 0.01924797 | -0.00469444 | 0.00123030  |
| 210 | 0.01953048 | -0.00602528 | -0.00044830 |
| 211 | 0.02055479 | -0.00692089 | -0.00197168 |
| 212 | 0.02127109 | -0.00651816 | -0.00335659 |
| 213 | 0.02213483 | -0.00607046 | -0.00474263 |
| 214 | 0.02296467 | -0.00569703 | -0.00622322 |
| 215 | 0.02360577 | -0.00555141 | -0.00782881 |
| 216 | 0.02403996 | -0.00566339 | -0.00955829 |
| 217 | 0.02424390 | -0.00606239 | -0.01143318 |
| 218 | 0.02419545 | -0.00675376 | -0.01349412 |
| 219 | 0.02414313 | -0.00749678 | -0.01571049 |
| 220 | 0.02317122 | -0.01304630 | -0.02078159 |
| 221 | 0.02425347 | -0.01184388 | -0.02177040 |
| 222 | 0.02528653 | -0.01049623 | -0.02262742 |
| 223 | 0.02626044 | -0.00900568 | -0.02333854 |
| 224 | 0.02717904 | -0.00740950 | -0.02394484 |
| 225 | 0.02806332 | -0.00570699 | -0.02439921 |
| 226 | 0.02891132 | -0.00389627 | -0.02472562 |
| 227 | 0.02972210 | -0.00199304 | -0.02495011 |
| 228 | 0.03050059 | 0.00001573  | -0.02516233 |
| 229 | 0.03127634 | 0.00210785  | -0.02535361 |

|     |             |             |             |
|-----|-------------|-------------|-------------|
| 230 | 0.03206709  | 0.00408498  | -0.02541819 |
| 231 | 0.03289150  | 0.00598315  | -0.02541608 |
| 232 | 0.03368931  | 0.00781706  | -0.02525265 |
| 233 | 0.03451248  | 0.00958273  | -0.02496520 |
| 234 | 0.03533457  | 0.01128484  | -0.02457606 |
| 235 | 0.03614620  | 0.01292831  | -0.02401532 |
| 236 | 0.03694148  | 0.01450416  | -0.02328835 |
| 237 | 0.03778907  | 0.01601307  | -0.02245887 |
| 238 | 0.03855855  | 0.01745661  | -0.02145743 |
| 239 | 0.03888475  | 0.01981946  | -0.01940042 |
| 240 | 0.04010667  | 0.02183582  | -0.01766443 |
| 241 | 0.04092429  | 0.02346424  | -0.01575532 |
| 242 | 0.04146144  | 0.02477846  | -0.01365837 |
| 243 | 0.04186063  | 0.02570415  | -0.01147833 |
| 244 | 0.04194117  | 0.02643238  | -0.00898900 |
| 245 | 0.04182865  | 0.02684829  | -0.00631497 |
| 246 | 0.04166271  | 0.02708369  | -0.00344115 |
| 247 | 0.04100844  | 0.02672020  | -0.00049133 |
| 248 | 0.04004020  | 0.02600828  | 0.00324849  |
| 249 | 0.03847911  | 0.02463087  | 0.00637246  |
| 250 | 0.03685459  | 0.02308029  | 0.00905333  |
| 251 | 0.03501108  | 0.02125962  | 0.01123584  |
| 252 | 0.03297990  | 0.01917058  | 0.01297620  |
| 253 | 0.03070400  | 0.01678464  | 0.01422758  |
| 254 | 0.02818725  | 0.01409760  | 0.01498207  |
| 255 | 0.02542364  | 0.01111246  | 0.01522383  |
| 256 | 0.02245061  | 0.00787182  | 0.01489752  |
| 257 | 0.01311974  | 0.00081012  | -0.00599028 |
| 258 | 0.01211988  | 0.00133279  | -0.00615102 |
| 259 | 0.01110153  | 0.00174106  | -0.00635382 |
| 260 | 0.01008689  | 0.00199581  | -0.00651821 |
| 261 | 0.00909724  | 0.00212087  | -0.00668821 |
| 262 | 0.00816223  | 0.00217749  | -0.00678693 |
| 263 | 0.00720180  | 0.00222086  | -0.00706723 |
| 264 | 0.00627080  | 0.00183617  | -0.00701892 |
| 265 | 0.00533404  | 0.00147619  | -0.00709163 |
| 266 | 0.00437515  | 0.00100064  | -0.00722394 |
| 267 | 0.00318884  | 0.00049737  | -0.00726539 |
| 268 | 0.00217223  | -0.00009021 | -0.00732366 |
| 269 | 0.00133961  | -0.00075967 | -0.00742249 |
| 270 | 0.00067825  | -0.00152598 | -0.00759176 |
| 271 | 0.00018559  | -0.00238301 | -0.00778955 |
| 272 | -0.00012641 | -0.00337071 | -0.00802264 |
| 273 | -0.00023340 | -0.00447706 | -0.00827512 |
| 274 | -0.00012205 | -0.00570941 | -0.00852679 |
| 275 | 0.00025350  | -0.00700665 | -0.00874122 |
| 276 | 0.00126596  | -0.00781609 | -0.00924688 |
| 277 | 0.00231528  | -0.00840274 | -0.00966156 |
| 278 | 0.00336064  | -0.00875194 | -0.00997013 |
| 279 | 0.00438509  | -0.00889165 | -0.01014926 |
| 280 | 0.00536773  | -0.00885461 | -0.01029585 |
| 281 | 0.00634414  | -0.00861265 | -0.01033560 |
| 282 | 0.00731506  | -0.00819964 | -0.01030828 |
| 283 | 0.00828336  | -0.00754335 | -0.01021225 |
| 284 | 0.00922618  | -0.00671279 | -0.00996160 |
| 285 | 0.01011190  | -0.00603193 | -0.00965554 |
| 286 | 0.01088653  | -0.00531008 | -0.00929159 |
| 287 | 0.01152931  | -0.00455440 | -0.00887661 |
| 288 | 0.01208771  | -0.00376425 | -0.00846834 |
| 289 | 0.01254380  | -0.00293754 | -0.00806331 |

|     |             |             |             |
|-----|-------------|-------------|-------------|
| 290 | 0.01288061  | -0.00205944 | -0.00760495 |
| 291 | 0.01309599  | -0.00113320 | -0.00710039 |
| 292 | 0.01319768  | -0.00015255 | -0.00660502 |
| 293 | -0.02768308 | 0.01718270  | 0.01941047  |
| 294 | -0.03022887 | 0.01984586  | 0.01811725  |
| 295 | -0.03220200 | 0.02177986  | 0.01711424  |
| 296 | -0.03478377 | 0.02353117  | 0.01459100  |
| 297 | -0.03554843 | 0.02348547  | 0.01306878  |
| 298 | -0.03618281 | 0.02298134  | 0.01125725  |
| 299 | -0.03639074 | 0.02161232  | 0.00895399  |
| 300 | -0.03754934 | -0.01148858 | 0.01715389  |
| 301 | -0.04012593 | -0.01195934 | 0.01625402  |
| 302 | -0.04213213 | -0.01230430 | 0.01542294  |
| 303 | -0.04353278 | -0.01237817 | 0.01437383  |
| 304 | -0.04478177 | -0.01197325 | 0.01188552  |
| 305 | -0.04488234 | -0.01159536 | 0.01041200  |
| 306 | -0.04458698 | -0.01102164 | 0.00864487  |
| 307 | -0.01737373 | -0.02039989 | 0.00550097  |
| 308 | -0.01783002 | -0.02165117 | 0.00390649  |
| 309 | -0.01824721 | -0.02263293 | 0.00252172  |
| 310 | -0.01878252 | -0.02316415 | 0.00123457  |
| 311 | -0.02020256 | -0.02288478 | -0.00110691 |
| 312 | -0.02108258 | -0.02216539 | -0.00222413 |
| 313 | -0.02210858 | -0.02101811 | -0.00330923 |
| 314 | -0.03244555 | 0.01145394  | 0.00418604  |
| 315 | -0.03368563 | 0.01280432  | 0.00337355  |
| 316 | -0.03466838 | 0.01357718  | 0.00236778  |
| 317 | -0.03537208 | 0.01383813  | 0.00134392  |
| 318 | -0.03617262 | 0.01340602  | -0.00071322 |
| 319 | -0.03635202 | 0.01277002  | -0.00188435 |
| 320 | -0.03637515 | 0.01177692  | -0.00322261 |
| 321 | -0.03849339 | -0.00879772 | 0.00629643  |
| 322 | -0.04110544 | -0.00906026 | 0.00522892  |
| 323 | -0.04239054 | -0.00915521 | 0.00399106  |
| 324 | -0.04369166 | -0.00922539 | 0.00206446  |
| 325 | -0.04386329 | -0.00906095 | 0.00105027  |
| 326 | -0.04384959 | -0.00878194 | -0.00010548 |
| 327 | -0.04356113 | -0.00832062 | -0.00148310 |
| 328 | -0.02324900 | -0.01480116 | -0.00193401 |
| 329 | -0.02362478 | -0.01691101 | -0.00392286 |
| 330 | -0.02499212 | -0.01672697 | -0.00587073 |
| 331 | -0.02590579 | -0.01703389 | -0.00784914 |
| 332 | -0.02643707 | -0.01673714 | -0.00865598 |
| 333 | -0.02707031 | -0.01623264 | -0.00946346 |
| 334 | -0.02785163 | -0.01541633 | -0.01028893 |
| 335 | 0.01089745  | 0.01562618  | 0.00002251  |
| 336 | 0.00987758  | 0.01510403  | 0.00046266  |
| 337 | 0.00866976  | 0.01398805  | 0.00140338  |
| 338 | 0.00615076  | 0.01488158  | 0.00081772  |
| 339 | 0.00427949  | 0.01479386  | 0.00132820  |
| 340 | 0.00236149  | 0.01497835  | 0.00183894  |
| 341 | 0.00016328  | 0.01509739  | 0.00270817  |
| 342 | -0.00223351 | 0.01497970  | 0.00399439  |
| 343 | -0.00478399 | 0.01458522  | 0.00555050  |
| 344 | -0.00742612 | 0.01432772  | 0.00720140  |
| 345 | -0.00905341 | 0.01414934  | 0.00796046  |
| 346 | -0.01073991 | 0.01400082  | 0.00871312  |
| 347 | -0.01245927 | 0.01381340  | 0.00944722  |
| 348 | -0.01420475 | 0.01347069  | 0.01020545  |
| 349 | -0.01599076 | 0.01309078  | 0.01093188  |

|     |             |             |             |
|-----|-------------|-------------|-------------|
| 350 | -0.01780415 | 0.01255071  | 0.01169396  |
| 351 | -0.01965002 | 0.01187184  | 0.01247362  |
| 352 | -0.02151018 | 0.01103545  | 0.01328089  |
| 353 | -0.02329753 | 0.00994064  | 0.01413172  |
| 354 | -0.02554348 | 0.00815345  | 0.01471392  |
| 355 | -0.02744617 | 0.00630501  | 0.01514523  |
| 356 | -0.02906193 | 0.00440778  | 0.01540646  |
| 357 | -0.03032391 | 0.00243893  | 0.01553632  |
| 358 | -0.03133198 | 0.00045044  | 0.01551037  |
| 359 | -0.03196536 | -0.00161379 | 0.01533971  |
| 360 | -0.03232028 | -0.00374616 | 0.01502392  |
| 361 | -0.03232262 | -0.00593305 | 0.01454751  |
| 362 | -0.03190322 | -0.00815323 | 0.01398195  |
| 363 | -0.03113142 | -0.00994663 | 0.01331202  |
| 364 | -0.03020501 | -0.01148327 | 0.01257712  |
| 365 | -0.02902820 | -0.01268020 | 0.01184901  |
| 366 | -0.02771627 | -0.01361317 | 0.01108108  |
| 367 | -0.02626607 | -0.01425034 | 0.01029463  |
| 368 | -0.02470464 | -0.01465647 | 0.00940888  |
| 369 | -0.02297823 | -0.01478400 | 0.00852834  |
| 370 | -0.02109855 | -0.01466163 | 0.00756725  |
| 371 | -0.01905815 | -0.01414517 | 0.00664583  |
| 372 | -0.01654279 | -0.01119928 | 0.00267189  |
| 373 | -0.01490568 | -0.00687847 | 0.00075732  |
| 374 | -0.01474011 | -0.00305048 | 0.00065790  |
| 375 | -0.01520245 | -0.00021637 | 0.00028526  |
| 376 | -0.01629742 | 0.00200875  | 0.00001296  |
| 377 | -0.01806483 | 0.00388964  | -0.00020214 |
| 378 | -0.02082390 | 0.00568052  | -0.00041236 |
| 379 | -0.02483937 | 0.00701940  | 0.00034389  |
| 380 | -0.02867011 | 0.00646808  | 0.00287533  |
| 381 | -0.03301212 | 0.00369418  | 0.00220887  |
| 382 | -0.03485261 | -0.00023748 | 0.00242615  |
| 383 | -0.03496258 | -0.00293567 | 0.00278655  |
| 384 | -0.03446122 | -0.00474479 | 0.00244525  |
| 385 | -0.03381460 | -0.00614589 | 0.00180018  |
| 386 | -0.03289367 | -0.00737739 | 0.00072789  |
| 387 | -0.03140909 | -0.00864348 | -0.00116508 |
| 388 | -0.02827581 | -0.00892783 | -0.00340193 |
| 389 | -0.02423295 | -0.00717718 | -0.00361257 |
| 390 | -0.02651617 | -0.00404540 | -0.00754754 |
| 391 | -0.02807495 | 0.00036931  | -0.00771058 |
| 392 | -0.02890535 | 0.00249682  | -0.00600247 |
| 393 | -0.02943823 | 0.00240445  | -0.00483191 |
| 394 | -0.03023342 | 0.00215741  | -0.00563568 |
| 395 | -0.03111167 | 0.00087709  | -0.00722849 |
| 396 | -0.03051256 | -0.00288989 | -0.00895570 |
| 397 | -0.03467356 | -0.00261489 | -0.01438243 |
| 398 | -0.00296958 | 0.02356477  | 0.01166397  |
| 399 | -0.00511391 | 0.02319427  | 0.01173842  |
| 400 | -0.00734091 | 0.02267752  | 0.01215986  |
| 401 | -0.00958180 | 0.02196469  | 0.01284322  |
| 402 | -0.01187719 | 0.02104553  | 0.01361253  |
| 403 | -0.01425643 | 0.01993155  | 0.01449671  |
| 404 | -0.01678894 | 0.01863586  | 0.01546511  |
| 405 | -0.01945450 | 0.01716271  | 0.01654057  |
| 406 | -0.02227819 | 0.01550737  | 0.01765222  |
| 407 | -0.02522368 | 0.01368986  | 0.01882638  |
| 408 | -0.02764296 | 0.01128795  | 0.01950705  |
| 409 | -0.02972809 | 0.00880949  | 0.01995443  |

|     |             |             |             |
|-----|-------------|-------------|-------------|
| 410 | -0.03149027 | 0.00627872  | 0.02015084  |
| 411 | -0.03288697 | 0.00365666  | 0.02016636  |
| 412 | -0.03397904 | 0.00099103  | 0.01989699  |
| 413 | -0.03471523 | -0.00175802 | 0.01941932  |
| 414 | -0.03508483 | -0.00459938 | 0.01875056  |
| 415 | -0.03508766 | -0.00752706 | 0.01790634  |
| 416 | -0.03467676 | -0.01055782 | 0.01700909  |
| 417 | -0.03330105 | -0.01294586 | 0.01590494  |
| 418 | -0.03175799 | -0.01497610 | 0.01488654  |
| 419 | -0.03006131 | -0.01663434 | 0.01389625  |
| 420 | -0.02823840 | -0.01792207 | 0.01286616  |
| 421 | -0.02628231 | -0.01882717 | 0.01179692  |
| 422 | -0.02418937 | -0.01935280 | 0.01070152  |
| 423 | -0.02194745 | -0.01951234 | 0.00957701  |
| 424 | -0.01961197 | -0.01925156 | 0.00834783  |
| 425 | -0.01723183 | -0.01856653 | 0.00698148  |
| 426 | -0.01404460 | -0.01592737 | 0.00518538  |
| 427 | -0.01179505 | -0.01310232 | 0.00350478  |
| 428 | -0.01037612 | -0.01018682 | 0.00207906  |
| 429 | -0.00977756 | -0.00720107 | 0.00091388  |
| 430 | -0.00990265 | -0.00411597 | 0.00008972  |
| 431 | -0.01080610 | -0.00091189 | -0.00042666 |
| 432 | -0.01249534 | 0.00240326  | -0.00066431 |
| 433 | -0.01498196 | 0.00582949  | -0.00061165 |
| 434 | -0.01821335 | 0.00938124  | -0.00021261 |
| 435 | -0.02163633 | 0.01018806  | 0.00111880  |
| 436 | -0.02475440 | 0.01056025  | 0.00229371  |
| 437 | -0.02754583 | 0.01051877  | 0.00330678  |
| 438 | -0.03000585 | 0.01005799  | 0.00416985  |
| 439 | -0.03212966 | 0.00919535  | 0.00489543  |
| 440 | -0.03394035 | 0.00790862  | 0.00545594  |
| 441 | -0.03542156 | 0.00621388  | 0.00592277  |
| 442 | -0.03657727 | 0.00411568  | 0.00628140  |
| 443 | -0.03739614 | 0.00159270  | 0.00639101  |
| 444 | -0.03750202 | -0.00052728 | 0.00621798  |
| 445 | -0.03745165 | -0.00252202 | 0.00587728  |
| 446 | -0.03714672 | -0.00429608 | 0.00546076  |
| 447 | -0.03665734 | -0.00591711 | 0.00504636  |
| 448 | -0.03602561 | -0.00734572 | 0.00452393  |
| 449 | -0.03515580 | -0.00866810 | 0.00396056  |
| 450 | -0.03406232 | -0.00982715 | 0.00340121  |
| 451 | -0.03289239 | -0.01085155 | 0.00268055  |
| 452 | -0.03148215 | -0.01166222 | 0.00192206  |
| 453 | -0.02988558 | -0.01219809 | 0.00084715  |
| 454 | -0.02841966 | -0.01239599 | -0.00020504 |
| 455 | -0.02686053 | -0.01231280 | -0.00099268 |
| 456 | -0.02567562 | -0.01193096 | -0.00186583 |
| 457 | -0.02451725 | -0.01126373 | -0.00264603 |
| 458 | -0.02345322 | -0.01027350 | -0.00335615 |
| 459 | -0.02254254 | -0.00896159 | -0.00405701 |
| 460 | -0.02180145 | -0.00731016 | -0.00474206 |
| 461 | -0.02129999 | -0.00537106 | -0.00549456 |
| 462 | -0.02439451 | -0.00221076 | -0.00644048 |
| 463 | -0.02620135 | 0.00018742  | -0.00724742 |
| 464 | -0.02680665 | 0.00237359  | -0.00571261 |
| 465 | -0.02767777 | 0.00377137  | -0.00500797 |
| 466 | -0.02871651 | 0.00438344  | -0.00495369 |
| 467 | -0.03007388 | 0.00399618  | -0.00605228 |
| 468 | -0.02921396 | 0.00258524  | -0.00574412 |
| 469 | -0.03361097 | -0.00122046 | -0.01423753 |



|     |             |             |             |
|-----|-------------|-------------|-------------|
| 470 | 0.01649718  | 0.01272030  | -0.00381789 |
| 471 | 0.01520587  | 0.01185858  | -0.00561068 |
| 472 | 0.01378345  | 0.01110665  | -0.00722193 |
| 473 | 0.01229920  | 0.01060893  | -0.00871207 |
| 474 | 0.01075369  | 0.01036643  | -0.01008259 |
| 475 | 0.00919258  | 0.01038728  | -0.01138733 |
| 476 | 0.00758724  | 0.01066275  | -0.01261533 |
| 477 | 0.00593199  | 0.01119037  | -0.01375033 |
| 478 | 0.00419298  | 0.01196739  | -0.01474950 |
| 479 | 0.00236806  | 0.01297310  | -0.01559663 |
| 480 | 0.00068609  | 0.01436225  | -0.01605954 |
| 481 | -0.00091567 | 0.01579185  | -0.01631715 |
| 482 | -0.00245189 | 0.01725782  | -0.01633632 |
| 483 | -0.00390737 | 0.01878252  | -0.01614196 |
| 484 | -0.00530911 | 0.02033707  | -0.01570509 |
| 485 | -0.00664416 | 0.02194415  | -0.01503246 |
| 486 | -0.00793382 | 0.02357246  | -0.01409563 |
| 487 | -0.00919633 | 0.02519459  | -0.01288375 |
| 488 | -0.01043922 | 0.02677614  | -0.01137584 |
| 489 | -0.01161014 | 0.02820087  | -0.00952394 |
| 490 | -0.01281859 | 0.02942940  | -0.00768423 |
| 491 | -0.01412120 | 0.03037834  | -0.00578031 |
| 492 | -0.01548705 | 0.03110733  | -0.00384012 |
| 493 | -0.01692592 | 0.03161796  | -0.00186189 |
| 494 | -0.01845682 | 0.03187387  | 0.00015588  |
| 495 | -0.02007367 | 0.03188491  | 0.00222759  |
| 496 | -0.02178101 | 0.03158752  | 0.00432515  |
| 497 | -0.02356588 | 0.03101271  | 0.00643712  |
| 498 | -0.02609403 | 0.02993539  | 0.00887471  |
| 499 | -0.02854229 | 0.02850887  | 0.01105028  |
| 500 | -0.03089795 | 0.02670245  | 0.01293424  |
| 501 | -0.03319280 | 0.02458155  | 0.01458026  |
| 502 | -0.03541054 | 0.02209356  | 0.01598071  |
| 503 | -0.03758984 | 0.01925854  | 0.01717160  |
| 504 | -0.03967600 | 0.01600440  | 0.01808662  |
| 505 | -0.04161858 | 0.01231087  | 0.01866961  |
| 506 | -0.04332890 | 0.00820962  | 0.01882785  |
| 507 | -0.04501146 | 0.00288233  | 0.01821682  |
| 508 | -0.04570401 | -0.00212384 | 0.01718502  |
| 509 | -0.04550780 | -0.00660843 | 0.01589138  |
| 510 | -0.04466353 | -0.01055318 | 0.01451030  |
| 511 | -0.04323464 | -0.01399910 | 0.01306999  |
| 512 | -0.04128966 | -0.01704752 | 0.01159197  |
| 513 | -0.03874631 | -0.01969557 | 0.01002749  |
| 514 | -0.03555170 | -0.02192338 | 0.00835254  |
| 515 | -0.03164707 | -0.02355594 | 0.00652654  |
| 516 | -0.02852601 | -0.02429606 | 0.00515011  |
| 517 | -0.02556409 | -0.02449928 | 0.00378322  |
| 518 | -0.02281191 | -0.02431234 | 0.00247724  |
| 519 | -0.02027555 | -0.02371550 | 0.00122737  |
| 520 | -0.01795932 | -0.02273501 | 0.00003236  |
| 521 | -0.01583118 | -0.02141817 | -0.00111750 |
| 522 | -0.01389163 | -0.01974071 | -0.00222284 |
| 523 | -0.01211873 | -0.01770825 | -0.00328664 |
| 524 | -0.01061250 | -0.01523465 | -0.00427473 |
| 525 | -0.00954624 | -0.01261140 | -0.00528564 |
| 526 | -0.00888862 | -0.00996854 | -0.00612137 |
| 527 | -0.00861026 | -0.00734335 | -0.00678590 |
| 528 | -0.00862875 | -0.00475448 | -0.00731457 |
| 529 | -0.00895103 | -0.00218835 | -0.00771166 |

|     |             |             |             |
|-----|-------------|-------------|-------------|
| 530 | -0.00959448 | 0.00037765  | -0.00795865 |
| 531 | -0.01056542 | 0.00294482  | -0.00804252 |
| 532 | -0.01191499 | 0.00548959  | -0.00794950 |
| 533 | -0.01369033 | 0.00793005  | -0.00766571 |
| 534 | -0.01575771 | 0.01040322  | -0.00709530 |
| 535 | -0.01796492 | 0.01239418  | -0.00640242 |
| 536 | -0.02027197 | 0.01389980  | -0.00561222 |
| 537 | -0.02263583 | 0.01498757  | -0.00474273 |
| 538 | -0.02506870 | 0.01565190  | -0.00379754 |
| 539 | -0.02758700 | 0.01592135  | -0.00276684 |
| 540 | -0.03020715 | 0.01574376  | -0.00165102 |
| 541 | -0.03291038 | 0.01508099  | -0.00044002 |
| 542 | -0.03563590 | 0.01383517  | 0.00084235  |
| 543 | -0.03832003 | 0.01198236  | 0.00178528  |
| 544 | -0.04048909 | 0.00982472  | 0.00251628  |
| 545 | -0.04218215 | 0.00750120  | 0.00305496  |
| 546 | -0.04345622 | 0.00506022  | 0.00341445  |
| 547 | -0.04432190 | 0.00249140  | 0.00360600  |
| 548 | -0.04481911 | -0.00021778 | 0.00363804  |
| 549 | -0.04493151 | -0.00310215 | 0.00349751  |
| 550 | -0.04454084 | -0.00615830 | 0.00315242  |
| 551 | -0.04351692 | -0.00926825 | 0.00255070  |
| 552 | -0.04228159 | -0.01168638 | 0.00160014  |
| 553 | -0.04077610 | -0.01366987 | 0.00057198  |
| 554 | -0.03907526 | -0.01523958 | -0.00048217 |
| 555 | -0.03723214 | -0.01645051 | -0.00156410 |
| 556 | -0.03524824 | -0.01730760 | -0.00267120 |
| 557 | -0.03310093 | -0.01782668 | -0.00380906 |
| 558 | -0.03078766 | -0.01802396 | -0.00498858 |
| 559 | -0.02828845 | -0.01783920 | -0.00620547 |
| 560 | -0.02566228 | -0.01710103 | -0.00742188 |
| 561 | -0.02106086 | -0.01313751 | -0.01091595 |
| 562 | -0.01869926 | -0.00795516 | -0.01298618 |
| 563 | -0.01826673 | -0.00367808 | -0.01381470 |
| 564 | -0.01885003 | -0.00041996 | -0.01422168 |
| 565 | -0.02024829 | 0.00233524  | -0.01453587 |
| 566 | -0.02278850 | 0.00497548  | -0.01471931 |
| 567 | -0.02724620 | 0.00745774  | -0.01420606 |
| 568 | -0.03388436 | 0.00879000  | -0.01197816 |
| 569 | -0.03989048 | 0.00722238  | -0.00806490 |
| 570 | -0.04186461 | 0.00067359  | -0.01023339 |
| 571 | -0.03998707 | -0.00813559 | -0.01187472 |
| 572 | -0.03740687 | -0.01243337 | -0.01165601 |
| 573 | -0.03592002 | -0.01363605 | -0.01157839 |
| 574 | -0.03525249 | -0.01388904 | -0.01211092 |
| 575 | -0.03510760 | -0.01344432 | -0.01316306 |
| 576 | -0.03530323 | -0.01172801 | -0.01470162 |
| 577 | -0.03518269 | -0.00739648 | -0.01623353 |
| 578 | 0.00622390  | -0.01436403 | -0.00679309 |
| 579 | 0.00400932  | -0.01338833 | -0.00605376 |
| 580 | 0.00190392  | -0.01225413 | -0.00566292 |
| 581 | 0.00007280  | -0.01088902 | -0.00548012 |
| 582 | -0.00138019 | -0.00923805 | -0.00544483 |
| 583 | -0.00240030 | -0.00727141 | -0.00551868 |
| 584 | -0.00296644 | -0.00491959 | -0.00567575 |
| 585 | -0.00310277 | -0.00211338 | -0.00588706 |
| 586 | -0.00313944 | 0.00093063  | -0.00642732 |
| 587 | -0.00336957 | 0.00340343  | -0.00787580 |
| 588 | -0.00410464 | 0.00534662  | -0.01054378 |
| 589 | -0.00515783 | 0.00717200  | -0.01295338 |

|     |             |             |             |
|-----|-------------|-------------|-------------|
| 590 | -0.00630383 | 0.00916041  | -0.01461741 |
| 591 | -0.00756947 | 0.01122482  | -0.01559693 |
| 592 | -0.00900390 | 0.01326427  | -0.01590766 |
| 593 | -0.01062789 | 0.01531805  | -0.01572664 |
| 594 | -0.01248650 | 0.01739672  | -0.01506352 |
| 595 | -0.01454201 | 0.01949844  | -0.01379671 |
| 596 | -0.01672138 | 0.02164170  | -0.01187750 |
| 597 | -0.01886383 | 0.02309860  | -0.00958891 |
| 598 | -0.02084406 | 0.02412994  | -0.00717595 |
| 599 | -0.02275496 | 0.02473471  | -0.00477526 |
| 600 | -0.02467894 | 0.02490953  | -0.00246857 |
| 601 | -0.02666394 | 0.02464541  | -0.00028898 |
| 602 | -0.02874209 | 0.02394906  | 0.00174815  |
| 603 | -0.03091209 | 0.02281087  | 0.00364620  |
| 604 | -0.03321768 | 0.02124597  | 0.00535197  |
| 605 | -0.03561519 | 0.01925866  | 0.00689645  |
| 606 | -0.03806169 | 0.01630833  | 0.00815888  |
| 607 | -0.04017155 | 0.01328482  | 0.00904451  |
| 608 | -0.04190955 | 0.01019071  | 0.00958085  |
| 609 | -0.04326412 | 0.00702502  | 0.00979325  |
| 610 | -0.04422169 | 0.00378214  | 0.00968997  |
| 611 | -0.04474054 | 0.00043562  | 0.00932839  |
| 612 | -0.04481806 | -0.00301251 | 0.00870821  |
| 613 | -0.04441074 | -0.00655668 | 0.00786672  |
| 614 | -0.04346848 | -0.01016838 | 0.00685525  |
| 615 | -0.04208213 | -0.01294265 | 0.00578559  |
| 616 | -0.04039062 | -0.01528718 | 0.00475898  |
| 617 | -0.03843674 | -0.01716334 | 0.00374411  |
| 618 | -0.03631180 | -0.01860099 | 0.00265215  |
| 619 | -0.03401165 | -0.01960039 | 0.00149958  |
| 620 | -0.03154428 | -0.02018082 | 0.00025183  |
| 621 | -0.02891136 | -0.02035467 | -0.00109193 |
| 622 | -0.02610131 | -0.02011348 | -0.00253953 |
| 623 | -0.02310589 | -0.01945014 | -0.00406618 |
| 624 | -0.02056488 | -0.01785194 | -0.00565778 |
| 625 | -0.01844006 | -0.01597740 | -0.00698984 |
| 626 | -0.01678023 | -0.01385321 | -0.00808713 |
| 627 | -0.01557325 | -0.01152228 | -0.00899667 |
| 628 | -0.01485901 | -0.00899199 | -0.00976327 |
| 629 | -0.01458412 | -0.00626911 | -0.01045717 |
| 630 | -0.01477794 | -0.00332283 | -0.01100156 |
| 631 | -0.01542989 | -0.00015037 | -0.01134959 |
| 632 | -0.01654830 | 0.00323288  | -0.01135724 |
| 633 | -0.01819678 | 0.00585976  | -0.01106901 |
| 634 | -0.01998149 | 0.00801694  | -0.01056478 |
| 635 | -0.02188730 | 0.00970444  | -0.00993137 |
| 636 | -0.02391600 | 0.01092896  | -0.00919508 |
| 637 | -0.02607127 | 0.01169464  | -0.00838755 |
| 638 | -0.02835314 | 0.01200054  | -0.00749308 |
| 639 | -0.03077762 | 0.01186785  | -0.00655880 |
| 640 | -0.03335406 | 0.01128928  | -0.00557514 |
| 641 | -0.03604767 | 0.01025175  | -0.00447112 |
| 642 | -0.03804322 | 0.00903302  | -0.00369766 |
| 643 | -0.03970652 | 0.00759609  | -0.00305756 |
| 644 | -0.04108715 | 0.00599286  | -0.00260042 |
| 645 | -0.04213935 | 0.00418435  | -0.00227659 |
| 646 | -0.04290598 | 0.00220335  | -0.00212878 |
| 647 | -0.04339822 | 0.00003657  | -0.00215462 |
| 648 | -0.04361999 | -0.00232296 | -0.00236488 |
| 649 | -0.04343251 | -0.00489297 | -0.00266033 |

|     |             |             |             |
|-----|-------------|-------------|-------------|
| 650 | -0.04284920 | -0.00762382 | -0.00304038 |
| 651 | -0.04180308 | -0.00973706 | -0.00364951 |
| 652 | -0.04056585 | -0.01149413 | -0.00426920 |
| 653 | -0.03916787 | -0.01287762 | -0.00493446 |
| 654 | -0.03769134 | -0.01393264 | -0.00571394 |
| 655 | -0.03610159 | -0.01464259 | -0.00657666 |
| 656 | -0.03441843 | -0.01502587 | -0.00754564 |
| 657 | -0.03265357 | -0.01511084 | -0.00864837 |
| 658 | -0.03077625 | -0.01485337 | -0.00985186 |
| 659 | -0.02877517 | -0.01422337 | -0.01110034 |
| 660 | -0.02566560 | -0.01097990 | -0.01387001 |
| 661 | -0.02345593 | -0.00745216 | -0.01534464 |
| 662 | -0.02248330 | -0.00429388 | -0.01572238 |
| 663 | -0.02256728 | -0.00171874 | -0.01592153 |
| 664 | -0.02363600 | 0.00041616  | -0.01600700 |
| 665 | -0.02572689 | 0.00229315  | -0.01639248 |
| 666 | -0.02911039 | 0.00416694  | -0.01670508 |
| 667 | -0.03363037 | 0.00526538  | -0.01465340 |
| 668 | -0.03833968 | 0.00509116  | -0.01192362 |
| 669 | -0.03895761 | 0.00031485  | -0.01408269 |
| 670 | -0.03873179 | -0.00464378 | -0.01545434 |
| 671 | -0.03745026 | -0.00807537 | -0.01528717 |
| 672 | -0.03660103 | -0.00982337 | -0.01508736 |
| 673 | -0.03602585 | -0.01041150 | -0.01516199 |
| 674 | -0.03568408 | -0.00993671 | -0.01549212 |
| 675 | -0.03539689 | -0.00840298 | -0.01596839 |
| 676 | -0.03525457 | -0.00562102 | -0.01691023 |
| 677 | 0.00896616  | -0.00298176 | 0.01823674  |
| 678 | 0.01261677  | -0.00482254 | 0.02068938  |
| 679 | 0.01656493  | -0.00637264 | 0.02248977  |
| 680 | 0.02043876  | -0.00769886 | 0.02385096  |
| 681 | 0.02413490  | -0.00881400 | 0.02528425  |
| 682 | 0.02779454  | -0.00975251 | 0.02623312  |
| 683 | 0.03136132  | -0.01043158 | 0.02703710  |
| 684 | 0.03490290  | -0.01103825 | 0.02748983  |
| 685 | 0.03838440  | -0.01134739 | 0.02763691  |
| 686 | 0.04175177  | -0.01150017 | 0.02745858  |

Procrustes sums of squares: 0.1731635305092391

Tangent sums of squares: 0.17190531554749228

Data matrices in this dataset:

- TragulidaeGM, raw data
- Tragulidae, centroid size
- Tragulidae, Procrustes coordinates

Principal Component Analysis: PCA: CovMatrix, Tragulidae, Procrustes coordinates

|    | Eigenvalues% | Variance | Cumulative % |
|----|--------------|----------|--------------|
| 1. | 0.00178417   | 24.909   | 24.909       |
| 2. | 0.00084187   | 11.754   | 36.663       |
| 3. | 0.00059519   | 8.310    | 44.972       |
| 4. | 0.00042005   | 5.864    | 50.837       |
| 5. | 0.00038996   | 5.444    | 56.281       |
| 6. | 0.00036225   | 5.057    | 61.338       |



-0.0060958751094603286 0.0026010141143502827 0.008062287339922506  
 -0.01822960206941421  
 Hyemoschus\_aquaticus\_NMB2985\_reflected 0.04339438983630804 -  
 0.023665153184974596 0.007867694527634713 -0.014192378625779885 -  
 0.009070071329838914 0.004127664266203017 -0.011479269379440741 -  
 0.007877907051587706 0.011402278490461937 0.008250969841067986 -  
 0.011900591559998492 -0.007983018122503892 -0.004088006988921389 -  
 0.008689233231129617 0.004872867486637163 -0.020929326105179998  
 0.011183463411943352 0.004524552866371584 -0.013226088387292407  
 0.009349461578668563 0.018611732625913757 -0.0038400134842774157  
 -0.016972037478503465 0.00533793692280304  
 Hyemoschus\_aquaticus\_NMB86990.024768795765449134 -0.028381437620908914  
 0.02479287380579199 -0.008373983045813478 0.011944797339451134  
 -0.011351742414059212 -0.024398024469065204 0.0028499329306016868  
 -0.0035470517976390163 0.006648120897494188 -0.025422037582441038  
 0.00942810788517758 0.02804985156451982 0.003523178825572873  
 0.014599987727376359 0.004563625822991577 0.013568560797013947  
 -0.00909712621163137 -0.0013203373615549966 -2.148652168184829E-4  
 -0.009877772826398137 -0.007166839026309556 0.012328953201613549  
 0.0068068929881167466  
 Hyemoschus\_aquaticus\_NMBL11945\_reflected 0.05493504607169158 -  
 0.03943219852895865 -0.02769741978803481 0.00646575729825078 -  
 0.002759028438809968 -0.008950820617472526 0.023183292945483106  
 0.03164039053744785 0.01563173820558327 -0.013724446954650532  
 0.019798717562947585 -0.0160086167018281 0.015131239899138678  
 0.008394513512415467 0.006774475955348468 -0.015024019756140075  
 -0.004270472678925446 -0.006914905628794563 0.015019003293558883  
 0.006678626395367075 0.0024237484724194056 -0.0032205189641025594  
 0.004636636339827728 -0.00170376375066606  
 Hyemoschus\_aquaticus\_NMBL12132\_reflected 0.04122590163105476 -  
 0.02575031902198404 0.032201861884496905 0.026395698190370485  
 0.004583910596453738 0.004038802899778598 0.0033219992891200525  
 0.010533348167381018 -0.015361082006591389 0.006844265369352647  
 -0.0011254738653300618 0.004735597102992154 -0.015872420891404414  
 0.03393821798071005 -0.009386214507178426 0.01264939415373886  
 0.00493255060799139 -0.006186826221578756 0.0017312068358417314  
 -0.007869682971844138 0.013377756952337224 0.008213963232777458  
 -0.0024062898661853377 0.002619597445677245  
 Hyemoschus\_aquaticus\_NMBLxx23 0.03693107680638722 -  
 0.01951938887570323 -0.002815670983721712 0.021818806712501297 -  
 2.5911207810157066E-4 0.005226236007670927 -0.009189517697159845 -  
 0.018746101493965172 0.014738029588660823 0.01814386814005594  
 3.944269986987888E-4 -0.006169149415677381 0.01782227772852786  
 0.004975338578613954 -0.009867757630862494 -0.0046796606386127065  
 -0.0243857572775458 0.007889901422268518 -0.014133980872447409  
 -0.017329935455360056 -0.006993261447668339 -0.004324064508141786  
 -0.0024908869747419394 -0.009207909326041278  
 Moschiola\_meminna\_NMB1429 0.010721272915908617 0.024692066484547224  
 -0.014521086764620779 -0.007936253945746354 -0.006064131962400903  
 -0.025912290425084427 0.02401683619434388 -0.015578339691530219  
 0.013565124076513559 -0.0052389742632005425 -0.035266864551611175  
 4.0190995746138904E-5 0.004999972561712038 0.0023406582079504904  
 0.009560266519335543 0.0049978939112492364 0.003124806201348784  
 0.010047373741944182 0.013017263732269291 -0.004575239812346474  
 0.004403930668226587 0.015281766337069024 -0.0026015331489799916  
 -0.0112640830040278  
 Tragulus\_kanchil\_NMB1891\_reflected -0.03623945768870097 -  
 0.03752614394165532 0.0535705711587164 0.019872319690399726  
 0.01873116015681446 -0.029551213803213284 0.026108090460331516  
 -0.0022850478588055684 -0.029765888306440617 -0.003259551960541442

|                                 |                        |                        |
|---------------------------------|------------------------|------------------------|
| 0.00325135387841783             | -0.005061416486650579  | -6.419029051693296E-4  |
| -0.020998246309009892           | 5.057948841346951E-7   | -0.0020547274618071413 |
| -0.005233119537941317           | 0.0035767607912860788  | 0.004650825313782549   |
| 0.0032256572483416166           | -0.006666558684888294  | -0.002299524802405931  |
| -0.009540398116352954           | -0.00225743828449952   |                        |
| Moschiola_meminna_NMB2319       | 0.020993730003973234   | 0.053513459668105424   |
| -6.631627946174197E-4           | -0.012673596142916296  | 0.022007493237860727   |
| -0.03892948637457043            | -0.026510420383657918  | 0.03043519207169044    |
| -0.009548363124974611           | 0.001032073563132961   | 0.02034409829179491    |
| 0.0036086145688307065           | 0.01018014557102439    | -0.0038129273258047216 |
| -0.0034834783099204165          | 0.006936731304345545   | -5.259777645402746E-4  |
| 0.010679030985790093            | -0.011722202443460903  | 0.002913548116856251   |
| 0.010110943824656994            | 0.004051169541851749   | 0.0017184936978633344  |
| -0.005762846315844898           |                        |                        |
| Moschiola_meminna_NMB2588       | 0.03178628268363042    | 0.03926879995836418    |
| 0.0121793537261325              | 0.003915363865335062   | -0.019109503816806397  |
| -0.0019542113236142877          | -0.0050841469982780265 | 0.004103331509198485   |
| -0.014111800552821251           | -0.0210980097113788    | -0.0210343049499675    |
| 0.010849262477203869            | -0.012990594693917482  | -1.6823453340883028E-4 |
| -0.019457292566390883           | -0.018043573138573417  | -0.011606325286689695  |
| 0.007113643988771347            | 0.00806345690473588    | 7.277956960083882E-4   |
| 0.001684626191059774            | -0.014364095260554053  | 0.01073307071412272    |
| 0.0032586354927487703           |                        |                        |
| Moschiola_meminna_NMB2589       | 0.032869849467583735   | 0.027373951733477685   |
| 0.006372628828599366            | -0.013417890311791343  | -0.011589139561100541  |
| -0.016910032045745274           | 0.02414258355702617    | -0.026931472246610577  |
| 0.0018930003119645368           | 0.01850931453007144    | 0.014660652418260764   |
| -0.022247226949677016           | -0.015619870320140852  | -0.00989487747793154   |
| 0.006841741241883903            | 0.008589634743896906   | 0.004714404284940624   |
| -0.01077455084692751            | -0.003589116880564068  | -0.00987626921976524   |
| 0.005823203772289869            | -0.008371842336650233  | 0.014387347938429301   |
| 0.00407071426631659             |                        |                        |
| Moschiola_meminna-NMB1366       | 0.025305067217995303   | 0.02824455875226159    |
| 0.002335521829514734            | -0.025818118276517584  | 0.009154222890327872   |
| -0.011979796836887425           | -1.5666298726218253E-4 | -0.010232620742927419  |
| 0.010399871981378121            | -0.020388359155525     | 0.01624002390025359    |
| 0.02019290485080139             | -0.007088685963557462  | 0.009260497615785615   |
| 0.007335771160675284            | -0.006649724246397321  | 6.660376564964924E-4   |
| -0.011664538441127716           | 0.0017608723202808673  | -0.014687980134751123  |
| -0.014369567571056754           | -0.0014136443983285517 | -0.01699163114102597   |
| 0.006460046473177124            |                        |                        |
| Moschiola_meminna-NMB2453       | 0.019420893503679246   | 0.060738903981187156   |
| -0.028599939573109946           | 0.03615988096586739    | 0.0042436569661193566  |
| 0.008926289820789843            | -0.007217046005436608  | -0.006252745369312002  |
| -0.021717750688238325           | 0.023276087494359856   | -0.004641340910608474  |
| -0.012314600224987095           | 8.098603252759861E-4   | 0.005148144472650761   |
| 0.004137003734177796            | -0.005894111639381891  | 0.001497162570437859   |
| -0.012582776793561989           | 0.004545036076646508   | 0.016786728216086826   |
| -0.011740318706476188           | 0.0023077462348193344  | -0.007766891009834148  |
| 2.3776468527819452E-4           |                        |                        |
| Tragulus_kanchil_NMB1532-foetus | -0.03389217561476492   |                        |
| 0.04697370488641263             | 0.05292401694928009    | -0.005532251032278996  |
| -0.0020297493720263862          | 0.04645768356122       | 0.004321217785837179   |
| 0.006816713112758391            | 0.010385546445358473   | -0.016422908494643673  |
| 0.0010656060833019866           | -0.014688974678418855  | 0.02270788954834761    |
| -0.006559820875333621           | -9.442994095959427E-4  | 0.0034864117728687118  |
| -0.004263905619533243           | -0.01150819795351749   | 0.0014089283882135573  |
| -0.002264001605049744           | 0.0074926363672323205  | 0.005527955175117542   |
| -0.001315032536921697           | -0.0010368505085691505 |                        |

|                           |                        |                        |
|---------------------------|------------------------|------------------------|
| Tragulus_kanchil_NMB2132  | -0.02285428639644255   | 0.014300211135167391   |
| 0.011104203264746763      | 0.003238755502661556   | 0.015363883679491139   |
| 0.019328762989270904      | 0.026508543807380477   | 0.03481038138339204    |
| 0.02373968798635281       | 0.027729538496294073   | -0.0010874942787521043 |
| 0.012570403662488851      | -0.012475738444622183  | -0.004903002718400305  |
| -0.0026544202899405843    | -0.012692968253651085  | 0.013372257085453323   |
| 0.013278016363775867      | -0.0033732024229498033 | -0.005175254840061396  |
| -0.010834429682780288     | 0.003248970710392372   | 0.005219913520330259   |
| 0.0016424642969947154     |                        |                        |
| Tragulus_kanchil_NMB3791  | -0.05477372221171944   | 0.008668126708296706   |
| -0.02062294350111558      | 0.04024294183977377    | -0.0015482936322623057 |
| -0.00244394063853429      | 0.020796214138251223   | -0.013836150526638637  |
| 0.008695820978535298      | -0.011114810282272175  | 0.004869695458398155   |
| 0.025426767169874836      | 0.008128272082658877   | 0.002375772996004316   |
| 0.016206306221595242      | 0.004660440598410104   | -0.009279340747325204  |
| 0.0046602115861207865     | -0.013502832317000496  | 0.007019676626769164   |
| 0.010062010662493976      | -0.001224974980827164  | 0.004013593434750495   |
| 0.012215965820356067      |                        |                        |
| Tragulus_kanchil_NMB3797  | -0.04507965199516663   | -0.016304323387698216  |
| -0.02488695301555427      | -0.034469248365698216  | -0.0351229075005697    |
| 0.012879194298436288      | 0.0010403490603158913  | 0.013355536400628545   |
| -0.0417355244373883       | 0.017937057006394797   | 0.002909697971856483   |
| 0.008083796699013943      | 0.007079547272313073   | -0.0014418490659697078 |
| 0.010317299803904261      | -0.007837351476682039  | -0.010425229668462276  |
| 4.4411180060669283E-4     | 0.0030888916021149996  | -0.011471778732432821  |
| 0.0036644979039572724     | 0.007332732216437564   | -3.2286359415222845E-4 |
| 0.0030344822010213257     |                        |                        |
| Tragulus_kanchil_NMB3802  | -0.06033205441395332   | -0.009577494602593243  |
| 0.022539817703972963      | -0.01269986163494576   | -0.011145602951780523  |
| -0.01008144062479366      | -0.029123902873885478  | 0.010885098060686422   |
| 0.025229410116820766      | 0.0073790255122925105  | -0.0034154565478768887 |
| -0.012452680643745105     | -0.023966808956603695  | 0.009976380730408296   |
| 0.01603718769860258       | 0.008268379697669474   | -0.021510319727491317  |
| 0.0025875942307425318     | 0.006059150332036693   | 0.011149113216133237   |
| -0.004804430153590904     | -0.001116602278915663  | 2.2826364287748067E-5  |
| 9.687527772861576E-4      |                        |                        |
| Tragulus_kanchil_NMB3806  | -0.05014281988188517   | -0.010885513572443332  |
| -0.010720293448698614     | -0.04139199863443972   | 0.01909326422314458    |
| -0.004742584733841472     | 0.017072489589055447   | -0.022864075448563444  |
| -1.6194350187523248E-4    | 0.002201480065092186   | 0.0019140606183208903  |
| -0.009636922069479756     | 0.010827595772779131   | 0.01844948032643475    |
| -0.02815704506892358      | -3.430584959997729E-4  | 1.0436474462672084E-4  |
| 0.004508466934324333      | -0.0035996931354975196 | 0.014379534387235627   |
| -0.004204042217474344     | 0.003272854187389784   | 0.002244002771097368   |
| 0.007360829583350445      |                        |                        |
| Tragulus_kanchil_NMBC3735 | -0.038440486061864336  | 0.0015186996678647363  |
| -0.0075368043425801685    | 0.014544263131360034   | -0.04838177519895052   |
| -3.0901315160658554E-4    | -0.004631244078658365  | 0.005840287382178362   |
| -0.0012545113877745443    | -0.011894008046990569  | 0.00828012477348129    |
| -0.012891686907330764     | 0.0067356798198272855  | 0.007093313298800653   |
| -0.004105083653666948     | 0.015192122519426726   | 0.023116826544404275   |
| 0.01640672371623862       | -0.0012054991119062476 | -0.0033347219907074    |
| -0.007929467025979554     | -0.011941451604748823  | -0.007059105140811247  |
| -0.0019543846180664166    |                        |                        |
| Tragulus_kanchil_NMBC3795 | -0.03742676704534454   | -0.02212481376588819   |
| -0.009944169777846266     | 0.013374019434100815   | -0.031026755251845565  |
| -0.02104168122913055      | -0.012943808359739845  | 0.003818192162372327   |
| 0.016765238986277367      | -9.716273029843291E-4  | -8.277975744297399E-4  |
| 0.012766504341594521      | -0.004478657286949881  | -0.01573899869243844   |
| -0.021698708546545015     | -0.002487372876875284  | 0.005155972580221204   |



```

-0.026427510462312582 -0.006123893677934499 0.0018373575541560533
-0.0014004203406969653 0.011317039675243772 0.0027819208744817646
-0.004611409431314429
Tragul_ napu_ NMB10085 -0.04832896472855574 -0.011302687268974206 -
0.0072830184297503885 0.017318472512620735 0.024822081272192376
0.008307912784967227 -0.03661047759215184 -0.030125440618681026
0.0017830777083971262 -0.0020325946727816667 0.01770422826775873
-0.0012266880664726072 -0.0025531525213993924 -0.0033257568835674688
0.0012241662315070228 -0.014545331641157002 0.011989254303839583
0.00871014235954954 0.02041256416096419 -0.008392040743877383
0.0066442208570611375 0.004606309870626506 0.00698554633444109
-8.149160588321175E-4
Hyemoschus_ aquaticus_ NMB26920.044597685082295176 -0.02077275013628025
-0.028258269575449444 0.004859617983269956 0.013928463392151997
0.01528449328966329 -0.00925266895332982 0.007899598552134776
-0.008810743113987562 -0.027048526645112043 -0.009129328993808422
-0.02224112274180848 -0.013986544244006464 -0.01414493439609987
8.646667028396621E-4 0.008498771314017535 -0.0022145703376469563
0.006897825859549566 -0.011609604484541515 -0.005095909037172399
-0.009461659609864084 0.014590371728060549 0.0038688326151882064
0.010288607736441182
Tragul_ kanchil_ NMB2988 -0.06180281901218965 -0.009291297173867013
-0.04100031446802128 -0.007566030671287667 0.0385841126487431
0.01284260556637272 0.004025627475546546 0.012489726100537021
-0.005790294482511385 -0.007088276225132258 -0.016166773597458526
-0.002470224194945054 -0.010872553423554296 3.587901811205574E-4
8.094360134406869E-4 0.006646338388144892 0.0018793694775130676
-0.012991710169378612 -0.005148259547983928 -0.006415225568944331
0.007223059246425338 -0.01775399943507147 -0.003272759530954182
-0.01146199088588141

```

'Coordinates for shape change graph for 'PC1' from 'PCA: CovMatrix, Tragulidae, Procrustes coordinates' in the MorphoJ project named 'new project...'

'The scale factor used for the shape change is 0.1

'Generated by MorphoJ, version 1.06d

1 2L 2058 1 9999 Dim=3

starting\_shape

PC1 hypothetical value 0.1

```

4.0608703E-002 -9.7871335E-003 2.3029292E-002
2.4114897E-002 -2.8573231E-002 -1.0973601E-002
2.5321920E-002 -2.9503887E-002 -1.2744875E-002
2.7011522E-002 -3.0666583E-002 -1.3812276E-002
2.8852052E-002 -3.1748846E-002 -1.4363195E-002
3.0810386E-002 -3.2755895E-002 -1.4528125E-002
3.2925174E-002 -3.3723074E-002 -1.4335492E-002
3.5241587E-002 -3.4672314E-002 -1.3777389E-002
3.7756438E-002 -3.5606888E-002 -1.2854293E-002
4.0454369E-002 -3.6498515E-002 -1.1482194E-002
4.3231319E-002 -3.7293054E-002 -9.5247877E-003
4.5801849E-002 -3.7987752E-002 -7.1808873E-003
4.7988393E-002 -3.8228121E-002 -4.6576194E-003
4.9720656E-002 -3.8131321E-002 -2.0133942E-003
5.1107868E-002 -3.7715626E-002 7.1402955E-004
5.2118292E-002 -3.7015534E-002 3.3512582E-003

```

5.2786404E-002 -3.5982675E-002 6.1266717E-003  
5.3210546E-002 -3.4612294E-002 9.0816613E-003  
5.3179410E-002 -3.2910324E-002 1.2050018E-002  
5.2695567E-002 -3.0880906E-002 1.5066584E-002  
5.1622200E-002 -2.7949433E-002 1.8004775E-002  
4.9971551E-002 -2.5144339E-002 2.0274598E-002  
4.7827436E-002 -2.2490358E-002 2.1898818E-002  
4.5233021E-002 -1.9951857E-002 2.2896139E-002  
4.2160571E-002 -1.7542229E-002 2.3242681E-002  
3.8569481E-002 -1.5304769E-002 2.2901458E-002  
3.4549415E-002 -1.3138546E-002 2.1927896E-002  
3.0103048E-002 -1.0862733E-002 2.0437527E-002  
2.5148579E-002 -8.8191935E-003 1.8249646E-002  
2.3144366E-002 -7.8409346E-003 1.6791539E-002  
2.1441702E-002 -7.2571906E-003 1.5280402E-002  
2.0106091E-002 -7.2326208E-003 1.3671190E-002  
1.9203879E-002 -7.7812080E-003 1.1990936E-002  
1.8665150E-002 -8.8043618E-003 1.0246202E-002  
1.8484485E-002 -1.0331841E-002 8.4276930E-003  
1.8540212E-002 -1.2296599E-002 6.4736948E-003  
1.8837079E-002 -1.4753106E-002 4.3271425E-003  
1.9760022E-002 -1.7756764E-002 2.3201477E-003  
2.0987196E-002 -1.9517981E-002 1.7621757E-003  
2.2257046E-002 -2.1187247E-002 1.2057654E-003  
2.3249589E-002 -2.2696151E-002 2.9337603E-004  
2.3963252E-002 -2.4044517E-002 -9.1885541E-004  
2.4434507E-002 -2.5236517E-002 -2.4030918E-003  
2.4664563E-002 -2.6293304E-002 -4.1531026E-003  
2.4580030E-002 -2.7144756E-002 -6.2400791E-003  
2.4222122E-002 -2.7740358E-002 -8.6554506E-003  
1.7969908E-002 -2.8019034E-002 -1.5356180E-002  
2.0014581E-002 -2.9296105E-002 -1.6830318E-002  
2.2282921E-002 -3.0487875E-002 -1.7799803E-002  
2.4644739E-002 -3.1588256E-002 -1.8340109E-002  
2.7045132E-002 -3.2708437E-002 -1.8624664E-002  
2.9501803E-002 -3.3748587E-002 -1.8562197E-002  
3.2033870E-002 -3.4770009E-002 -1.8188504E-002  
3.4640345E-002 -3.5740041E-002 -1.7468159E-002  
3.7330328E-002 -3.6700492E-002 -1.6427402E-002  
4.0091568E-002 -3.7589098E-002 -1.5010781E-002  
4.2021600E-002 -3.8224858E-002 -1.3782042E-002  
4.3843264E-002 -3.8720695E-002 -1.2419099E-002  
4.5557229E-002 -3.9127631E-002 -1.0956925E-002  
4.7178010E-002 -3.9443075E-002 -9.3913309E-003  
4.8700464E-002 -3.9660446E-002 -7.7067636E-003  
5.0130505E-002 -3.9777878E-002 -5.8914132E-003  
5.1435185E-002 -3.9747319E-002 -3.9275736E-003  
5.2635967E-002 -3.9608342E-002 -1.8333096E-003  
5.3641369E-002 -3.9233778E-002 4.0392323E-004  
5.4440963E-002 -3.8754274E-002 2.5707880E-003  
5.5045962E-002 -3.8101561E-002 4.6821648E-003  
5.5495398E-002 -3.7340561E-002 6.7234026E-003  
5.5811012E-002 -3.6477119E-002 8.7025246E-003  
5.5953064E-002 -3.5497184E-002 1.0609842E-002  
5.6001785E-002 -3.4438263E-002 1.2474337E-002  
5.5877844E-002 -3.3250041E-002 1.4270213E-002  
5.5616957E-002 -3.1949296E-002 1.6000999E-002  
5.5174978E-002 -3.0512364E-002 1.7641135E-002  
5.4529313E-002 -2.8543154E-002 1.9609758E-002  
5.3546221E-002 -2.6521139E-002 2.1329978E-002

5.2250887E-002 -2.4393782E-002 2.2879139E-002  
5.0561233E-002 -2.2155578E-002 2.4146766E-002  
4.8495049E-002 -1.9790331E-002 2.5118478E-002  
4.6025220E-002 -1.7301904E-002 2.5692058E-002  
4.3213911E-002 -1.4695145E-002 2.5966899E-002  
4.0100885E-002 -1.1917023E-002 2.6422887E-002  
3.6594325E-002 -9.1103374E-003 2.6376031E-002  
1.9356807E-002 2.4765107E-002 6.1950640E-003  
2.0305571E-002 2.5993149E-002 4.4721739E-003  
2.1851884E-002 2.7303785E-002 3.1276342E-003  
2.3721848E-002 2.8354086E-002 2.1362320E-003  
2.5700161E-002 2.9127446E-002 1.3332189E-003  
2.7759379E-002 2.9727923E-002 6.2817186E-004  
2.9945701E-002 3.0170701E-002 3.5932138E-005  
3.2284650E-002 3.0506406E-002 -4.9724910E-004  
3.4803868E-002 3.0670915E-002 -8.8636274E-004  
3.7494576E-002 3.0615454E-002 -1.0852455E-003  
4.0026087E-002 3.0072002E-002 -9.9585837E-004  
4.2550469E-002 2.9576649E-002 -9.3729335E-004  
4.4835615E-002 2.8731121E-002 -5.7232683E-004  
4.6920304E-002 2.7651385E-002 2.5528878E-005  
4.8872060E-002 2.6377664E-002 7.7476574E-004  
5.0700654E-002 2.4887122E-002 1.6827618E-003  
5.2362607E-002 2.3179036E-002 2.8033686E-003  
5.3873747E-002 2.1219088E-002 4.1037817E-003  
5.5107557E-002 1.9019741E-002 5.6518274E-003  
5.6354670E-002 1.5249092E-002 8.1271149E-003  
5.6686863E-002 1.1745166E-002 1.0572854E-002  
5.6263888E-002 8.6541368E-003 1.2871620E-002  
5.5233370E-002 5.9167501E-003 1.4963524E-002  
5.3654049E-002 3.4586062E-003 1.6857551E-002  
5.1546912E-002 1.1859374E-003 1.8574710E-002  
4.8733847E-002 -7.8278263E-004 2.0141291E-002  
4.5154637E-002 -2.2842375E-003 2.1554118E-002  
4.0914386E-002 -3.0702949E-003 2.2832292E-002  
3.5972312E-002 -3.1914287E-003 2.2270854E-002  
3.1590063E-002 -2.7425333E-003 2.1650006E-002  
2.7827716E-002 -1.8569454E-003 2.0990218E-002  
2.4623890E-002 -8.1027675E-004 2.0242906E-002  
2.1966506E-002 5.1537830E-004 1.9407850E-002  
1.9890226E-002 2.3098475E-003 1.8533815E-002  
1.8452094E-002 4.5644453E-003 1.7605542E-002  
1.7502223E-002 7.1510459E-003 1.6505577E-002  
1.7280327E-002 1.0085901E-002 1.5641726E-002  
1.8206500E-002 1.1947892E-002 1.5487361E-002  
1.9234613E-002 1.3784783E-002 1.5353621E-002  
1.9991477E-002 1.5558139E-002 1.4905683E-002  
2.0516198E-002 1.7257458E-002 1.4176697E-002  
2.0797577E-002 1.8895391E-002 1.3173241E-002  
2.0842204E-002 2.0488659E-002 1.1900275E-002  
2.0492066E-002 2.1948201E-002 1.0202855E-002  
1.9777636E-002 2.3267028E-002 8.1392709E-003  
1.2137528E-002 2.6255787E-002 4.6683279E-003  
1.3576774E-002 2.7799233E-002 3.5122662E-003  
1.5341149E-002 2.9080029E-002 2.4511919E-003  
1.7300965E-002 3.0140391E-002 1.4822245E-003  
1.9392238E-002 3.1051946E-002 5.9048138E-004  
2.1618856E-002 3.1808472E-002 -2.2455537E-004  
2.3973898E-002 3.2469333E-002 -9.6368114E-004  
2.6474596E-002 3.3014446E-002 -1.6395860E-003

2.9120669E-002 3.3451651E-002 -2.2465994E-003  
3.1918664E-002 3.3728916E-002 -2.7642755E-003  
3.4198262E-002 3.3814823E-002 -3.0921664E-003  
3.6441019E-002 3.3648544E-002 -3.2707861E-003  
3.8610125E-002 3.3333993E-002 -3.2692791E-003  
4.0737854E-002 3.2891820E-002 -3.1692096E-003  
4.2821917E-002 3.2266912E-002 -2.9557314E-003  
4.4848869E-002 3.1527368E-002 -2.6020090E-003  
4.6822079E-002 3.0632641E-002 -2.1029154E-003  
4.8775202E-002 2.9595645E-002 -1.5093497E-003  
5.0635944E-002 2.8355515E-002 -7.5616279E-004  
5.2599616E-002 2.6794396E-002 2.2815072E-004  
5.4318030E-002 2.5109307E-002 1.3025973E-003  
5.5805453E-002 2.3330705E-002 2.4736262E-003  
5.7045199E-002 2.1447211E-002 3.7259761E-003  
5.8018612E-002 1.9477471E-002 5.0848119E-003  
5.8793731E-002 1.7395178E-002 6.5264566E-003  
5.9373373E-002 1.5177305E-002 8.0483614E-003  
5.9667721E-002 1.2875043E-002 9.6845305E-003  
5.9596918E-002 1.0441223E-002 1.1370401E-002  
5.8911437E-002 7.2643065E-003 1.3720746E-002  
5.7787658E-002 4.3220764E-003 1.5917967E-002  
5.6153170E-002 1.6477450E-003 1.7925604E-002  
5.4081884E-002 -7.7686089E-004 1.9778198E-002  
5.1555932E-002 -2.9754703E-003 2.1462653E-002  
4.8489890E-002 -4.8693647E-003 2.2903723E-002  
4.4925880E-002 -6.4890093E-003 2.4113485E-002  
4.1041543E-002 -7.9449613E-003 2.5405348E-002  
3.6594325E-002 -9.1103374E-003 2.6376031E-002  
2.4779385E-002 -7.6774117E-003 -1.7548036E-002  
2.5398601E-002 -7.0550645E-003 -1.8651195E-002  
2.6159505E-002 -6.1310566E-003 -1.9551326E-002  
2.6979573E-002 -4.9870639E-003 -2.0267586E-002  
2.7831094E-002 -3.6558015E-003 -2.0820781E-002  
2.8711355E-002 -2.1453690E-003 -2.1234238E-002  
2.9596618E-002 -4.4666496E-004 -2.1592325E-002  
3.0497908E-002 1.4522744E-003 -2.1888549E-002  
3.1415544E-002 3.5572768E-003 -2.2127234E-002  
3.2384155E-002 5.8488292E-003 -2.2155422E-002  
3.3229461E-002 7.4912311E-003 -2.2130070E-002  
3.4064030E-002 9.0622700E-003 -2.1888877E-002  
3.4844979E-002 1.0581069E-002 -2.1560971E-002  
3.5606539E-002 1.2032689E-002 -2.1078794E-002  
3.6324056E-002 1.3487541E-002 -2.0473043E-002  
3.7010263E-002 1.4813154E-002 -1.9721955E-002  
3.7669994E-002 1.6058280E-002 -1.8849586E-002  
3.8302692E-002 1.7368030E-002 -1.7828428E-002  
3.8869539E-002 1.8479121E-002 -1.6687860E-002  
3.9421225E-002 1.9846818E-002 -1.5288169E-002  
3.9829943E-002 2.0984725E-002 -1.3805730E-002  
4.0101389E-002 2.1930184E-002 -1.2234022E-002  
4.0224974E-002 2.2680110E-002 -1.0605474E-002  
4.0231371E-002 2.3232965E-002 -8.8997343E-003  
4.0100521E-002 2.3589038E-002 -7.1250224E-003  
3.9851955E-002 2.3807030E-002 -5.2676504E-003  
3.9477516E-002 2.3811039E-002 -3.3128742E-003  
3.8959868E-002 2.3576783E-002 -1.2818769E-003  
3.7714838E-002 2.2741721E-002 2.0346168E-003  
3.6255645E-002 2.1484742E-002 4.7569438E-003  
3.4677586E-002 2.0043080E-002 6.9850885E-003

3.2939117E-002 1.8372100E-002 8.6661834E-003  
3.1051157E-002 1.6595525E-002 9.9289351E-003  
2.8987778E-002 1.4598698E-002 1.0719098E-002  
2.6772627E-002 1.2377913E-002 1.1011181E-002  
2.4404371E-002 9.9365168E-003 1.0732204E-002  
2.1961766E-002 7.2793024E-003 9.7655853E-003  
2.1086612E-002 5.2310811E-003 8.9570027E-003  
2.0378775E-002 3.2952673E-003 7.9644227E-003  
2.0006865E-002 1.4453501E-003 6.7858921E-003  
1.9754439E-002 -2.7387242E-004 5.5738066E-003  
1.9506432E-002 -1.8400868E-003 4.2657055E-003  
1.9350804E-002 -3.2907558E-003 2.8362697E-003  
1.9247973E-002 -4.6944352E-003 1.2302977E-003  
1.9530484E-002 -6.0252777E-003 -4.4830437E-004  
2.0554787E-002 -6.9208873E-003 -1.9716761E-003  
2.1271092E-002 -6.5181639E-003 -3.3565927E-003  
2.2134831E-002 -6.0704558E-003 -4.7426302E-003  
2.2964669E-002 -5.6970278E-003 -6.2232181E-003  
2.3605766E-002 -5.5514112E-003 -7.8288064E-003  
2.4039962E-002 -5.6633944E-003 -9.5582893E-003  
2.4243903E-002 -6.0623931E-003 -1.1433180E-002  
2.4195452E-002 -6.7537554E-003 -1.3494119E-002  
2.4143126E-002 -7.4967810E-003 -1.5710491E-002  
2.3171219E-002 -1.3046298E-002 -2.0781587E-002  
2.4253466E-002 -1.1843884E-002 -2.1770399E-002  
2.5286527E-002 -1.0496226E-002 -2.2627419E-002  
2.6260441E-002 -9.0056843E-003 -2.3338537E-002  
2.7179044E-002 -7.4095011E-003 -2.3944837E-002  
2.8063316E-002 -5.7069878E-003 -2.4399208E-002  
2.8911318E-002 -3.8962713E-003 -2.4725623E-002  
2.9722098E-002 -1.9930376E-003 -2.4950106E-002  
3.0500587E-002 1.5733905E-005 -2.5162327E-002  
3.1276339E-002 2.1078534E-003 -2.5353605E-002  
3.2067086E-002 4.0849791E-003 -2.5418188E-002  
3.2891497E-002 5.9831493E-003 -2.5416085E-002  
3.3689314E-002 7.8170648E-003 -2.5252651E-002  
3.4512483E-002 9.5827332E-003 -2.4965196E-002  
3.5334567E-002 1.1284841E-002 -2.4576062E-002  
3.6146198E-002 1.2928310E-002 -2.4015316E-002  
3.6941479E-002 1.4504162E-002 -2.3288350E-002  
3.7789066E-002 1.6013069E-002 -2.2458865E-002  
3.8558546E-002 1.7456610E-002 -2.1457432E-002  
3.8884753E-002 1.9819457E-002 -1.9400419E-002  
4.0106671E-002 2.1835818E-002 -1.7664434E-002  
4.0924293E-002 2.3464245E-002 -1.5755318E-002  
4.1461438E-002 2.4778456E-002 -1.3658366E-002  
4.1860626E-002 2.5704154E-002 -1.1478334E-002  
4.1941165E-002 2.6432383E-002 -8.9890025E-003  
4.1828655E-002 2.6848285E-002 -6.3149706E-003  
4.1662706E-002 2.7083688E-002 -3.4411546E-003  
4.1008440E-002 2.6720199E-002 -4.9133271E-004  
4.0040199E-002 2.6008279E-002 3.2484902E-003  
3.8479107E-002 2.4630868E-002 6.3724641E-003  
3.6854595E-002 2.3080287E-002 9.0533287E-003  
3.5011081E-002 2.1259618E-002 1.1235843E-002  
3.2979904E-002 1.9170578E-002 1.2976202E-002  
3.0704001E-002 1.6784639E-002 1.4227585E-002  
2.8187246E-002 1.4097599E-002 1.4982068E-002  
2.5423644E-002 1.1112461E-002 1.5223828E-002  
2.2450606E-002 7.8718217E-003 1.4897519E-002

1.3119738E-002 8.1011753E-004 -5.9902751E-003  
1.2119881E-002 1.3327859E-003 -6.1510246E-003  
1.1101526E-002 1.7410568E-003 -6.3538222E-003  
1.0086893E-002 1.9958072E-003 -6.5182121E-003  
9.0972417E-003 2.1208677E-003 -6.6882065E-003  
8.1622276E-003 2.1774881E-003 -6.7869308E-003  
7.2017974E-003 2.2208606E-003 -7.0672344E-003  
6.2707961E-003 1.8361653E-003 -7.0189178E-003  
5.3340420E-003 1.4761929E-003 -7.0916276E-003  
4.3751473E-003 1.0006431E-003 -7.2239416E-003  
3.1888405E-003 4.9737364E-004 -7.2653919E-003  
2.1722350E-003 -9.0214737E-005 -7.3236642E-003  
1.3396076E-003 -7.5967493E-004 -7.4224875E-003  
6.7824556E-004 -1.5259792E-003 -7.5917624E-003  
1.8559405E-004 -2.3830097E-003 -7.7895516E-003  
-1.2641041E-004 -3.3707062E-003 -8.0226371E-003  
-2.3340308E-004 -4.4770578E-003 -8.2751204E-003  
-1.2205196E-004 -5.7094139E-003 -8.5267871E-003  
2.5350168E-004 -7.0066539E-003 -8.7412176E-003  
1.2659621E-003 -7.8160882E-003 -9.2468785E-003  
2.3152754E-003 -8.4027375E-003 -9.6615561E-003  
3.3606385E-003 -8.7519359E-003 -9.9701273E-003  
4.3850902E-003 -8.8916481E-003 -1.0149262E-002  
5.3677288E-003 -8.8546087E-003 -1.0295850E-002  
6.3441421E-003 -8.6126460E-003 -1.0335604E-002  
7.3150620E-003 -8.1996432E-003 -1.0308275E-002  
8.2833572E-003 -7.5433538E-003 -1.0212246E-002  
9.2261781E-003 -6.7127890E-003 -9.9616028E-003  
1.0111897E-002 -6.0319331E-003 -9.6555447E-003  
1.0886535E-002 -5.3100779E-003 -9.2915859E-003  
1.1529310E-002 -4.5543951E-003 -8.8766141E-003  
1.2087707E-002 -3.7642497E-003 -8.4683445E-003  
1.2543804E-002 -2.9375359E-003 -8.0633098E-003  
1.2880607E-002 -2.0594353E-003 -7.6049478E-003  
1.3095995E-002 -1.1331966E-003 -7.1003908E-003  
1.3197680E-002 -1.5255094E-004 -6.6050173E-003  
-2.7683078E-002 1.7182696E-002 1.9410468E-002  
-3.0228873E-002 1.9845864E-002 1.8117246E-002  
-3.2201997E-002 2.1779862E-002 1.7114244E-002  
-3.4783765E-002 2.3531171E-002 1.4591000E-002  
-3.5548425E-002 2.3485468E-002 1.3068783E-002  
-3.6182808E-002 2.2981341E-002 1.1257246E-002  
-3.6390737E-002 2.1612325E-002 8.9539941E-003  
-3.7549336E-002 -1.1488581E-002 1.7153890E-002  
-4.0125930E-002 -1.1959336E-002 1.6254021E-002  
-4.2132130E-002 -1.2304301E-002 1.5422944E-002  
-4.3532784E-002 -1.2378171E-002 1.4373832E-002  
-4.4781772E-002 -1.1973248E-002 1.1885515E-002  
-4.4882344E-002 -1.1595358E-002 1.0412001E-002  
-4.4586981E-002 -1.1021636E-002 8.6448682E-003  
-1.7373731E-002 -2.0399894E-002 5.5009745E-003  
-1.7830018E-002 -2.1651171E-002 3.9064901E-003  
-1.8247212E-002 -2.2632934E-002 2.5217158E-003  
-1.8782521E-002 -2.3164146E-002 1.2345732E-003  
-2.0202560E-002 -2.2884781E-002 -1.1069141E-003  
-2.1082580E-002 -2.2165391E-002 -2.2241291E-003  
-2.2108583E-002 -2.1018110E-002 -3.3092306E-003  
-3.2445548E-002 1.1453935E-002 4.1860369E-003  
-3.3685633E-002 1.2804319E-002 3.3735492E-003  
-3.4668381E-002 1.3577179E-002 2.3677816E-003

-3.5372082E-002 1.3838133E-002 1.3439191E-003  
-3.6172618E-002 1.3406023E-002 -7.1322251E-004  
-3.6352025E-002 1.2770025E-002 -1.8843472E-003  
-3.6375146E-002 1.1776921E-002 -3.2226084E-003  
-3.8493393E-002 -8.7977185E-003 6.2964295E-003  
-4.1105439E-002 -9.0602568E-003 5.2289212E-003  
-4.2390538E-002 -9.1552141E-003 3.9910594E-003  
-4.3691662E-002 -9.2253885E-003 2.0644556E-003  
-4.3863291E-002 -9.0609495E-003 1.0502744E-003  
-4.3849586E-002 -8.7819353E-003 -1.0548108E-004  
-4.3561127E-002 -8.3206225E-003 -1.4831023E-003  
-2.3248996E-002 -1.4801159E-002 -1.9340083E-003  
-2.3624777E-002 -1.6911009E-002 -3.9228625E-003  
-2.4992124E-002 -1.6726967E-002 -5.8707290E-003  
-2.5905792E-002 -1.7033890E-002 -7.8491392E-003  
-2.6437071E-002 -1.6737142E-002 -8.6559787E-003  
-2.7070305E-002 -1.6232639E-002 -9.4634560E-003  
-2.7851627E-002 -1.5416334E-002 -1.0288931E-002  
1.0897451E-002 1.5626175E-002 2.2511334E-005  
9.8775794E-003 1.5104033E-002 4.6265832E-004  
8.6697572E-003 1.3988047E-002 1.4033813E-003  
6.1507575E-003 1.4881583E-002 8.1772218E-004  
4.2794931E-003 1.4793861E-002 1.3282020E-003  
2.3614897E-003 1.4978350E-002 1.8389422E-003  
1.6327756E-004 1.5097386E-002 2.7081661E-003  
-2.2335062E-003 1.4979701E-002 3.9943866E-003  
-4.7839861E-003 1.4585216E-002 5.5505021E-003  
-7.4261218E-003 1.4327716E-002 7.2014024E-003  
-9.0534143E-003 1.4149340E-002 7.9604636E-003  
-1.0739908E-002 1.4000824E-002 8.7131240E-003  
-1.2459266E-002 1.3813399E-002 9.4472228E-003  
-1.4204749E-002 1.3470690E-002 1.0205448E-002  
-1.5990758E-002 1.3090784E-002 1.0931881E-002  
-1.7804152E-002 1.2550707E-002 1.1693964E-002  
-1.9650017E-002 1.1871844E-002 1.2473617E-002  
-2.1510184E-002 1.1035451E-002 1.3280888E-002  
-2.3297528E-002 9.9406388E-003 1.4131722E-002  
-2.5543477E-002 8.1534496E-003 1.4713921E-002  
-2.7446171E-002 6.3050138E-003 1.5145231E-002  
-2.9061930E-002 4.4077809E-003 1.5406458E-002  
-3.0323908E-002 2.4389309E-003 1.5536324E-002  
-3.1331976E-002 4.5044154E-004 1.5510369E-002  
-3.1965363E-002 -1.6137939E-003 1.5339714E-002  
-3.2320277E-002 -3.7461558E-003 1.5023915E-002  
-3.2322625E-002 -5.9330476E-003 1.4547505E-002  
-3.1903219E-002 -8.1532314E-003 1.3981946E-002  
-3.1131418E-002 -9.9466275E-003 1.3312022E-002  
-3.0205011E-002 -1.1483269E-002 1.2577118E-002  
-2.9028197E-002 -1.2680200E-002 1.1849007E-002  
-2.7716275E-002 -1.3613172E-002 1.1081082E-002  
-2.6266066E-002 -1.4250344E-002 1.0294633E-002  
-2.4704640E-002 -1.4656472E-002 9.4088781E-003  
-2.2978232E-002 -1.4783998E-002 8.5283388E-003  
-2.1098547E-002 -1.4661628E-002 7.5672489E-003  
-1.9058148E-002 -1.4145168E-002 6.6458340E-003  
-1.6542792E-002 -1.1199275E-002 2.6718885E-003  
-1.4905681E-002 -6.8784677E-003 7.5732010E-004  
-1.4740106E-002 -3.0504783E-003 6.5789577E-004  
-1.5202450E-002 -2.1637094E-004 2.8525548E-004  
-1.6297424E-002 2.0087466E-003 1.2956150E-005

-1.8064830E-002 3.8896395E-003 -2.0214454E-004  
-2.0823902E-002 5.6805211E-003 -4.1236396E-004  
-2.4839368E-002 7.0193968E-003 3.4388854E-004  
-2.8670106E-002 6.4680847E-003 2.8753324E-003  
-3.3012124E-002 3.6941834E-003 2.2088704E-003  
-3.4852613E-002 -2.3748365E-004 2.4261538E-003  
-3.4962579E-002 -2.9356743E-003 2.7865500E-003  
-3.4461217E-002 -4.7447869E-003 2.4452504E-003  
-3.3814600E-002 -6.1458940E-003 1.8001790E-003  
-3.2893666E-002 -7.3773904E-003 7.2788689E-004  
-3.1409094E-002 -8.6434772E-003 -1.1650760E-003  
-2.8275812E-002 -8.9278350E-003 -3.4019314E-003  
-2.4232950E-002 -7.1771788E-003 -3.6125687E-003  
-2.6516168E-002 -4.0453976E-003 -7.5475450E-003  
-2.8074945E-002 3.6931206E-004 -7.7105844E-003  
-2.8905355E-002 2.4968211E-003 -6.0024735E-003  
-2.9438231E-002 2.4044452E-003 -4.8319074E-003  
-3.0233418E-002 2.1574059E-003 -5.6356765E-003  
-3.1111665E-002 8.7708583E-004 -7.2284881E-003  
-3.0512562E-002 -2.8898936E-003 -8.9557046E-003  
-3.4673559E-002 -2.6148947E-003 -1.4382432E-002  
-2.9695803E-003 2.3564773E-002 1.1663972E-002  
-5.1139059E-003 2.3194274E-002 1.1738421E-002  
-7.3409119E-003 2.2677515E-002 1.2159865E-002  
-9.5818026E-003 2.1964691E-002 1.2843219E-002  
-1.1877189E-002 2.1045531E-002 1.3612530E-002  
-1.4256434E-002 1.9931550E-002 1.4496710E-002  
-1.6788939E-002 1.8635855E-002 1.5465111E-002  
-1.9454498E-002 1.7162709E-002 1.6540572E-002  
-2.2278192E-002 1.5507373E-002 1.7652218E-002  
-2.5223677E-002 1.3689861E-002 1.8826376E-002  
-2.7642963E-002 1.1287954E-002 1.9507047E-002  
-2.9728086E-002 8.8094876E-003 1.9954433E-002  
-3.1490270E-002 6.2787203E-003 2.0150844E-002  
-3.2886970E-002 3.6566571E-003 2.0166358E-002  
-3.3979039E-002 9.9103309E-004 1.9896992E-002  
-3.4715231E-002 -1.7580204E-003 1.9419320E-002  
-3.5084828E-002 -4.5993846E-003 1.8750561E-002  
-3.5087655E-002 -7.5270620E-003 1.7906336E-002  
-3.4676762E-002 -1.0557823E-002 1.7009088E-002  
-3.3301050E-002 -1.2945860E-002 1.5904941E-002  
-3.1757993E-002 -1.4976096E-002 1.4886544E-002  
-3.0061314E-002 -1.6634338E-002 1.3896248E-002  
-2.8238399E-002 -1.7922070E-002 1.2866163E-002  
-2.6282311E-002 -1.8827171E-002 1.1796921E-002  
-2.4189366E-002 -1.9352798E-002 1.0701525E-002  
-2.1947454E-002 -1.9512337E-002 9.5770121E-003  
-1.9611974E-002 -1.9251560E-002 8.3478301E-003  
-1.7231833E-002 -1.8566527E-002 6.9814849E-003  
-1.4044597E-002 -1.5927367E-002 5.1853771E-003  
-1.1795052E-002 -1.3102319E-002 3.5047798E-003  
-1.0376122E-002 -1.0186821E-002 2.0790633E-003  
-9.7775623E-003 -7.2010712E-003 9.1387892E-004  
-9.9026516E-003 -4.1159703E-003 8.9719694E-005  
-1.0806100E-002 -9.1189075E-004 -4.2665543E-004  
-1.2495344E-002 2.4032571E-003 -6.6430609E-004  
-1.4981961E-002 5.8294898E-003 -6.1164600E-004  
-1.8213348E-002 9.3812432E-003 -2.1260533E-004  
-2.1636334E-002 1.0188062E-002 1.1187999E-003  
-2.4754401E-002 1.0560245E-002 2.2937121E-003



-2.7545829E-002 1.0518769E-002 3.3067828E-003  
-3.0005847E-002 1.0057987E-002 4.1698523E-003  
-3.2129662E-002 9.1953461E-003 4.8954293E-003  
-3.3940346E-002 7.9086154E-003 5.4559424E-003  
-3.5421557E-002 6.2138831E-003 5.9227682E-003  
-3.6577273E-002 4.1156760E-003 6.2814031E-003  
-3.7396142E-002 1.5927030E-003 6.3910090E-003  
-3.7502022E-002 -5.2727648E-004 6.2179829E-003  
-3.7451651E-002 -2.5220212E-003 5.8772827E-003  
-3.7146720E-002 -4.2960821E-003 5.4607593E-003  
-3.6657344E-002 -5.9171099E-003 5.0463630E-003  
-3.6025612E-002 -7.3457187E-003 4.5239285E-003  
-3.5155797E-002 -8.6681012E-003 3.9605618E-003  
-3.4062321E-002 -9.8271509E-003 3.4012092E-003  
-3.2892385E-002 -1.0851553E-002 2.6805509E-003  
-3.1482146E-002 -1.1662217E-002 1.9220631E-003  
-2.9885583E-002 -1.2198086E-002 8.4715287E-004  
-2.8419661E-002 -1.2395987E-002 -2.0503583E-004  
-2.6860530E-002 -1.2312804E-002 -9.9267875E-004  
-2.5675620E-002 -1.1930961E-002 -1.8658284E-003  
-2.4517248E-002 -1.1263734E-002 -2.6460330E-003  
-2.3453215E-002 -1.0273495E-002 -3.3561478E-003  
-2.2542541E-002 -8.9615925E-003 -4.0570148E-003  
-2.1801445E-002 -7.3101558E-003 -4.7420627E-003  
-2.1299990E-002 -5.3710568E-003 -5.4945592E-003  
-2.4394508E-002 -2.2107613E-003 -6.4404791E-003  
-2.6201352E-002 1.8742030E-004 -7.2474206E-003  
-2.6806652E-002 2.3735911E-003 -5.7126142E-003  
-2.7677772E-002 3.7713652E-003 -5.0079694E-003  
-2.8716510E-002 4.3834427E-003 -4.9536875E-003  
-3.0073885E-002 3.9961816E-003 -6.0522790E-003  
-2.9213957E-002 2.5852444E-003 -5.7441213E-003  
-3.3610975E-002 -1.2204560E-003 -1.4237527E-002  
1.6497179E-002 1.2720297E-002 -3.8178918E-003  
1.5205868E-002 1.1858583E-002 -5.6106831E-003  
1.3783446E-002 1.1106649E-002 -7.2219295E-003  
1.2299201E-002 1.0608928E-002 -8.7120682E-003  
1.0753687E-002 1.0366428E-002 -1.0082588E-002  
9.1925792E-003 1.0387279E-002 -1.1387332E-002  
7.5872413E-003 1.0662752E-002 -1.2615328E-002  
5.9319919E-003 1.1190372E-002 -1.3750334E-002  
4.1929829E-003 1.1967393E-002 -1.4749499E-002  
2.3680598E-003 1.2973096E-002 -1.5596634E-002  
6.8609384E-004 1.4362247E-002 -1.6059545E-002  
-9.1567338E-004 1.5791846E-002 -1.6317153E-002  
-2.4518869E-003 1.7257824E-002 -1.6336320E-002  
-3.9073673E-003 1.8782518E-002 -1.6141957E-002  
-5.3091131E-003 2.0337067E-002 -1.5705092E-002  
-6.6441645E-003 2.1944154E-002 -1.5032462E-002  
-7.9338216E-003 2.3572455E-002 -1.4095631E-002  
-9.1963312E-003 2.5194594E-002 -1.2883750E-002  
-1.0439215E-002 2.6776136E-002 -1.1375842E-002  
-1.1610137E-002 2.8200865E-002 -9.5239395E-003  
-1.2818592E-002 2.9429405E-002 -7.6842287E-003  
-1.4121199E-002 3.0378336E-002 -5.7803139E-003  
-1.5487052E-002 3.1107334E-002 -3.8401170E-003  
-1.6925921E-002 3.1617961E-002 -1.8618931E-003  
-1.8456818E-002 3.1873867E-002 1.5588088E-004  
-2.0073670E-002 3.1884909E-002 2.2275941E-003  
-2.1781015E-002 3.1587523E-002 4.3251492E-003

-2.3565879E-002 3.1012711E-002 6.4371238E-003  
-2.6094034E-002 2.9935388E-002 8.8747054E-003  
-2.8542285E-002 2.8508866E-002 1.1050280E-002  
-3.0897949E-002 2.6702448E-002 1.2934243E-002  
-3.3192805E-002 2.4581553E-002 1.4580264E-002  
-3.5410538E-002 2.2093561E-002 1.5980707E-002  
-3.7589840E-002 1.9258545E-002 1.7171600E-002  
-3.9676005E-002 1.6004400E-002 1.8086617E-002  
-4.1618582E-002 1.2310874E-002 1.8669606E-002  
-4.3328903E-002 8.2096213E-003 1.8827846E-002  
-4.5011462E-002 2.8823254E-003 1.8216821E-002  
-4.5704011E-002 -2.1238431E-003 1.7185022E-002  
-4.5507801E-002 -6.6084260E-003 1.5891383E-002  
-4.4663534E-002 -1.0553182E-002 1.4510295E-002  
-4.3234644E-002 -1.3999104E-002 1.3069988E-002  
-4.1289663E-002 -1.7047519E-002 1.1591965E-002  
-3.8746315E-002 -1.9695566E-002 1.0027495E-002  
-3.5551703E-002 -2.1923377E-002 8.3525402E-003  
-3.1647066E-002 -2.3555942E-002 6.5265398E-003  
-2.8526011E-002 -2.4296064E-002 5.1501101E-003  
-2.5564085E-002 -2.4499285E-002 3.7832233E-003  
-2.2811912E-002 -2.4312343E-002 2.4772429E-003  
-2.0275550E-002 -2.3715498E-002 1.2273748E-003  
-1.7959320E-002 -2.2735007E-002 3.2361694E-005  
-1.5831181E-002 -2.1418167E-002 -1.1175030E-003  
-1.3891632E-002 -1.9740708E-002 -2.2228401E-003  
-1.2118726E-002 -1.7708246E-002 -3.2866401E-003  
-1.0612505E-002 -1.5234647E-002 -4.2747259E-003  
-9.5462352E-003 -1.2611400E-002 -5.2856372E-003  
-8.8886211E-003 -9.9685400E-003 -6.1213738E-003  
-8.6102637E-003 -7.3433484E-003 -6.7858978E-003  
-8.6287487E-003 -4.7544825E-003 -7.3145718E-003  
-8.9510316E-003 -2.1883533E-003 -7.7116608E-003  
-9.5944823E-003 3.7765470E-004 -7.9586491E-003  
-1.0565417E-002 2.9448181E-003 -8.0425158E-003  
-1.1914989E-002 5.4895941E-003 -7.9494998E-003  
-1.3690331E-002 7.9300543E-003 -7.6657142E-003  
-1.5757715E-002 1.0403223E-002 -7.0953017E-003  
-1.7964915E-002 1.2394182E-002 -6.4024184E-003  
-2.0271971E-002 1.3899799E-002 -5.6122211E-003  
-2.2635830E-002 1.4987569E-002 -4.7427253E-003  
-2.5068701E-002 1.5651904E-002 -3.7975354E-003  
-2.7587000E-002 1.5921353E-002 -2.7668449E-003  
-3.0207153E-002 1.5743760E-002 -1.6510249E-003  
-3.2910382E-002 1.5080990E-002 -4.4001830E-004  
-3.5635898E-002 1.3835173E-002 8.4234836E-004  
-3.8320030E-002 1.1982356E-002 1.7852835E-003  
-4.0489091E-002 9.8247182E-003 2.5162784E-003  
-4.2182148E-002 7.5011964E-003 3.0549639E-003  
-4.3456222E-002 5.0602155E-003 3.4144452E-003  
-4.4321904E-002 2.4914002E-003 3.6059962E-003  
-4.4819106E-002 -2.1778422E-004 3.6380358E-003  
-4.4931506E-002 -3.1021523E-003 3.4975075E-003  
-4.4540843E-002 -6.1582982E-003 3.1524243E-003  
-4.3516925E-002 -9.2682473E-003 2.5506952E-003  
-4.2281588E-002 -1.1686382E-002 1.6001432E-003  
-4.0776099E-002 -1.3669874E-002 5.7198377E-004  
-3.9075260E-002 -1.5239580E-002 -4.8217438E-004  
-3.7232142E-002 -1.6450506E-002 -1.5641022E-003  
-3.5248237E-002 -1.7307595E-002 -2.6712031E-003

-3.3100931E-002 -1.7826683E-002 -3.8090571E-003  
-3.0787661E-002 -1.8023961E-002 -4.9885802E-003  
-2.8288454E-002 -1.7839198E-002 -6.2054719E-003  
-2.5662277E-002 -1.7101032E-002 -7.4218834E-003  
-2.1060862E-002 -1.3137510E-002 -1.0915949E-002  
-1.8699265E-002 -7.9551609E-003 -1.2986181E-002  
-1.8266734E-002 -3.6780850E-003 -1.3814697E-002  
-1.8850034E-002 -4.1995579E-004 -1.4221684E-002  
-2.0248288E-002 2.3352448E-003 -1.4535873E-002  
-2.2788500E-002 4.9754796E-003 -1.4719305E-002  
-2.7246201E-002 7.4577431E-003 -1.4206059E-002  
-3.3884363E-002 8.7900025E-003 -1.1978160E-002  
-3.9890484E-002 7.2223796E-003 -8.0649005E-003  
-4.1864606E-002 6.7358992E-004 -1.0233387E-002  
-3.9987067E-002 -8.1355875E-003 -1.1874717E-002  
-3.7406867E-002 -1.2433369E-002 -1.1656010E-002  
-3.5920025E-002 -1.3636045E-002 -1.1578390E-002  
-3.5252487E-002 -1.3889042E-002 -1.2110917E-002  
-3.5107595E-002 -1.3444316E-002 -1.3163055E-002  
-3.5303228E-002 -1.1728011E-002 -1.4701623E-002  
-3.5182693E-002 -7.3964797E-003 -1.6233535E-002  
6.2238999E-003 -1.4364031E-002 -6.7930923E-003  
4.0093189E-003 -1.3388330E-002 -6.0537554E-003  
1.9039162E-003 -1.2254128E-002 -5.6629210E-003  
7.2803331E-005 -1.0889017E-002 -5.4801159E-003  
-1.3801859E-003 -9.2380503E-003 -5.4448264E-003  
-2.4003019E-003 -7.2714095E-003 -5.5186837E-003  
-2.9664429E-003 -4.9195868E-003 -5.6757461E-003  
-3.1027723E-003 -2.1133818E-003 -5.8870599E-003  
-3.1394357E-003 9.3063400E-004 -6.4273167E-003  
-3.3695721E-003 3.4034321E-003 -7.8757952E-003  
-4.1046396E-003 5.3466242E-003 -1.0543779E-002  
-5.1578297E-003 7.1720019E-003 -1.2953382E-002  
-6.3038324E-003 9.1604121E-003 -1.4617405E-002  
-7.5694692E-003 1.1224819E-002 -1.5596930E-002  
-9.0038961E-003 1.3264271E-002 -1.5907661E-002  
-1.0627886E-002 1.5318050E-002 -1.5726642E-002  
-1.2486497E-002 1.7396715E-002 -1.5063520E-002  
-1.4542011E-002 1.9498442E-002 -1.3796709E-002  
-1.6721384E-002 2.1641704E-002 -1.1877498E-002  
-1.8863826E-002 2.3098601E-002 -9.5889123E-003  
-2.0844056E-002 2.4129937E-002 -7.1759476E-003  
-2.2754961E-002 2.4734713E-002 -4.7752646E-003  
-2.4678938E-002 2.4909533E-002 -2.4685656E-003  
-2.6663940E-002 2.4645408E-002 -2.8897629E-004  
-2.8742094E-002 2.3949060E-002 1.7481543E-003  
-3.0912090E-002 2.2810865E-002 3.6462004E-003  
-3.3217680E-002 2.1245967E-002 5.3519724E-003  
-3.5615186E-002 1.9258657E-002 6.8964508E-003  
-3.8061694E-002 1.6308335E-002 8.1588840E-003  
-4.0171551E-002 1.3284816E-002 9.0445081E-003  
-4.1909553E-002 1.0190714E-002 9.5808506E-003  
-4.3264115E-002 7.0250187E-003 9.7932509E-003  
-4.4221693E-002 3.7821363E-003 9.6899743E-003  
-4.4740536E-002 4.3562175E-004 9.3283893E-003  
-4.4818063E-002 -3.0125081E-003 8.7082076E-003  
-4.4410739E-002 -6.5566762E-003 7.8667241E-003  
-4.3468485E-002 -1.0168381E-002 6.8552466E-003  
-4.2082133E-002 -1.2942653E-002 5.7855938E-003  
-4.0390619E-002 -1.5287184E-002 4.7589773E-003

-3.8436742E-002 -1.7163337E-002 3.7441067E-003  
-3.6311802E-002 -1.8600992E-002 2.6521478E-003  
-3.4011645E-002 -1.9600389E-002 1.4995838E-003  
-3.1544279E-002 -2.0180821E-002 2.5183182E-004  
-2.8911357E-002 -2.0354673E-002 -1.0919250E-003  
-2.6101308E-002 -2.0113480E-002 -2.5395261E-003  
-2.3105893E-002 -1.9450145E-002 -4.0661773E-003  
-2.0564884E-002 -1.7851943E-002 -5.6577760E-003  
-1.8440062E-002 -1.5977400E-002 -6.9898406E-003  
-1.6780226E-002 -1.3853209E-002 -8.0871293E-003  
-1.5573249E-002 -1.1522276E-002 -8.9966722E-003  
-1.4859005E-002 -8.9919877E-003 -9.7632685E-003  
-1.4584117E-002 -6.2691112E-003 -1.0457167E-002  
-1.4777938E-002 -3.3228316E-003 -1.1001562E-002  
-1.5429889E-002 -1.5036909E-004 -1.1349589E-002  
-1.6548295E-002 3.2328841E-003 -1.1357245E-002  
-1.8196782E-002 5.8597595E-003 -1.1069008E-002  
-1.9981486E-002 8.0169439E-003 -1.0564784E-002  
-2.1887300E-002 9.7044411E-003 -9.9313713E-003  
-2.3916003E-002 1.0928960E-002 -9.1950753E-003  
-2.6071265E-002 1.1694644E-002 -8.3875549E-003  
-2.8353142E-002 1.2000540E-002 -7.4930834E-003  
-3.0777615E-002 1.1867852E-002 -6.5588028E-003  
-3.3354059E-002 1.1289277E-002 -5.5751379E-003  
-3.6047675E-002 1.0251747E-002 -4.4711204E-003  
-3.8043223E-002 9.0330178E-003 -3.6976629E-003  
-3.9706516E-002 7.5960920E-003 -3.0575587E-003  
-4.1087150E-002 5.9928632E-003 -2.6004197E-003  
-4.2139353E-002 4.1843473E-003 -2.2765922E-003  
-4.2905979E-002 2.2033481E-003 -2.1287840E-003  
-4.3398219E-002 3.6569616E-005 -2.1546165E-003  
-4.3619987E-002 -2.3229635E-003 -2.3648801E-003  
-4.3432513E-002 -4.8929724E-003 -2.6603310E-003  
-4.2849202E-002 -7.6238170E-003 -3.0403784E-003  
-4.1803077E-002 -9.7370599E-003 -3.6495055E-003  
-4.0565851E-002 -1.1494134E-002 -4.2691953E-003  
-3.9167866E-002 -1.2877617E-002 -4.9344568E-003  
-3.7691343E-002 -1.3932639E-002 -5.7139384E-003  
-3.6101591E-002 -1.4642594E-002 -6.5766635E-003  
-3.4418429E-002 -1.5025869E-002 -7.5456448E-003  
-3.2653568E-002 -1.5110841E-002 -8.6483674E-003  
-3.0776251E-002 -1.4853366E-002 -9.8518576E-003  
-2.8775170E-002 -1.4223368E-002 -1.1100344E-002  
-2.5665595E-002 -1.0979905E-002 -1.3870010E-002  
-2.3455933E-002 -7.4521609E-003 -1.5344635E-002  
-2.2483303E-002 -4.2938780E-003 -1.5722384E-002  
-2.2567282E-002 -1.7187432E-003 -1.5921533E-002  
-2.3635998E-002 4.1616089E-004 -1.6007002E-002  
-2.5726889E-002 2.2931543E-003 -1.6392483E-002  
-2.9110393E-002 4.1669386E-003 -1.6705085E-002  
-3.3630366E-002 5.2653835E-003 -1.4653404E-002  
-3.8339682E-002 5.0911570E-003 -1.1923620E-002  
-3.8957610E-002 3.1484777E-004 -1.4082690E-002  
-3.8731787E-002 -4.6437795E-003 -1.5454345E-002  
-3.7450260E-002 -8.0753688E-003 -1.5287173E-002  
-3.6601032E-002 -9.8233718E-003 -1.5087355E-002  
-3.6025854E-002 -1.0411501E-002 -1.5161992E-002  
-3.5684078E-002 -9.9367095E-003 -1.5492116E-002  
-3.5396894E-002 -8.4029778E-003 -1.5968392E-002  
-3.5254572E-002 -5.6210249E-003 -1.6910229E-002

8.9661641E-003 -2.9817631E-003 1.8236741E-002  
1.2616769E-002 -4.8225367E-003 2.0689376E-002  
1.6564926E-002 -6.3726392E-003 2.2489770E-002  
2.0438761E-002 -7.6988645E-003 2.3850965E-002  
2.4134897E-002 -8.8139975E-003 2.5284245E-002  
2.7794540E-002 -9.7525121E-003 2.6233116E-002  
3.1361324E-002 -1.0431585E-002 2.7037102E-002  
3.4902899E-002 -1.1038246E-002 2.7489835E-002  
3.8384402E-002 -1.1347387E-002 2.7636914E-002  
4.1751768E-002 -1.1500167E-002 2.7458581E-002

4.7309246E-002 -1.3578474E-002 2.5229984E-002  
2.1007630E-002 -2.9231659E-002 -1.2296304E-002  
2.2458458E-002 -3.0362089E-002 -1.4353877E-002  
2.4626515E-002 -3.1700811E-002 -1.5560864E-002  
2.6978779E-002 -3.2941664E-002 -1.6080365E-002  
2.9396657E-002 -3.4113481E-002 -1.6279407E-002  
3.1976702E-002 -3.5291285E-002 -1.6093940E-002  
3.4783282E-002 -3.6521186E-002 -1.5547088E-002  
3.7813615E-002 -3.7766671E-002 -1.4529786E-002  
4.1028103E-002 -3.8997415E-002 -1.2927157E-002  
4.4309812E-002 -4.0120860E-002 -1.0658763E-002  
4.7503847E-002 -4.1121977E-002 -7.5734139E-003  
5.0137488E-002 -4.1647137E-002 -4.2896394E-003  
5.2215359E-002 -4.1661218E-002 -9.6892184E-004  
5.3915874E-002 -4.1292359E-002 2.2116716E-003  
5.5289267E-002 -4.0515078E-002 5.4635383E-003  
5.6285960E-002 -3.9347720E-002 8.6104906E-003  
5.6947283E-002 -3.7821704E-002 1.1644683E-002  
5.7061762E-002 -3.5835497E-002 1.4722183E-002  
5.6555984E-002 -3.3434858E-002 1.7716386E-002  
5.5203927E-002 -2.9885161E-002 2.0469195E-002  
5.2987304E-002 -2.6622326E-002 2.2453226E-002  
5.0268498E-002 -2.3652093E-002 2.3769870E-002  
4.7283639E-002 -2.0740251E-002 2.4554863E-002  
4.3858478E-002 -1.7889553E-002 2.4755829E-002  
3.9555816E-002 -1.5700626E-002 2.4038171E-002  
3.4810801E-002 -1.3804567E-002 2.2611183E-002  
2.9799502E-002 -1.1500406E-002 2.0860446E-002  
2.4247657E-002 -9.2729181E-003 1.8578595E-002  
2.2221877E-002 -8.2353275E-003 1.7216842E-002  
2.0491401E-002 -7.8110940E-003 1.5590405E-002  
1.9170381E-002 -8.0343567E-003 1.3816173E-002  
1.8330201E-002 -8.8001222E-003 1.1969794E-002  
1.7881269E-002 -1.0028174E-002 1.0042716E-002  
1.7762368E-002 -1.1708175E-002 8.0138748E-003  
1.7844479E-002 -1.3853548E-002 5.8161651E-003  
1.7869866E-002 -1.6360624E-002 3.2014447E-003  
1.8689808E-002 -1.9465375E-002 7.6716468E-004  
1.9451940E-002 -2.0532326E-002 -2.9551540E-004  
2.0405544E-002 -2.1612860E-002 -1.2241754E-003  
2.1362820E-002 -2.2796578E-002 -2.1093509E-003  
2.1953678E-002 -2.3950304E-002 -3.2831522E-003  
2.2220829E-002 -2.5040302E-002 -4.7084927E-003  
2.2081929E-002 -2.5995510E-002 -6.4613565E-003  
2.1559723E-002 -2.6878351E-002 -8.4584843E-003  
2.1030426E-002 -2.7962587E-002 -1.0456728E-002  
1.6739657E-002 -2.9210280E-002 -1.6384946E-002  
1.9340578E-002 -3.0593662E-002 -1.7856233E-002  
2.2131523E-002 -3.1852005E-002 -1.8766312E-002

2.4911748E-002 -3.3080970E-002 -1.9242729E-002  
2.7624273E-002 -3.4340049E-002 -1.9478051E-002  
3.0355436E-002 -3.5578462E-002 -1.9430086E-002  
3.3099862E-002 -3.6746576E-002 -1.9025166E-002  
3.5855518E-002 -3.7894781E-002 -1.8269365E-002  
3.8610186E-002 -3.9067519E-002 -1.7235971E-002  
4.1362591E-002 -4.0115559E-002 -1.5767119E-002  
4.3649750E-002 -4.1052264E-002 -1.4227380E-002  
4.5744667E-002 -4.1694035E-002 -1.2465834E-002  
4.7695091E-002 -4.2260364E-002 -1.0682886E-002  
4.9468737E-002 -4.2659303E-002 -8.7833957E-003  
5.1106686E-002 -4.2971606E-002 -6.8422536E-003  
5.2589986E-002 -4.3141338E-002 -4.7762747E-003  
5.3913689E-002 -4.3127551E-002 -2.6201929E-003  
5.5152565E-002 -4.3040685E-002 -4.0751213E-004  
5.6188465E-002 -4.2733267E-002 1.9103615E-003  
5.7172612E-002 -4.2273798E-002 3.9969919E-003  
5.8021632E-002 -4.1686271E-002 6.0275919E-003  
5.8738134E-002 -4.0985941E-002 8.0067283E-003  
5.9225094E-002 -4.0119408E-002 9.9205940E-003  
5.9628541E-002 -3.9176188E-002 1.1805523E-002  
5.9866744E-002 -3.8086068E-002 1.3638294E-002  
5.9904941E-002 -3.6839682E-002 1.5406622E-002  
5.9784272E-002 -3.5458304E-002 1.7121661E-002  
5.9480071E-002 -3.3937746E-002 1.8758282E-002  
5.8802482E-002 -3.2006799E-002 2.0631500E-002  
5.7842305E-002 -3.0007993E-002 2.2313158E-002  
5.6639227E-002 -2.7864547E-002 2.3694513E-002  
5.5160228E-002 -2.5620940E-002 2.4747593E-002  
5.3527998E-002 -2.3221414E-002 2.5587155E-002  
5.1712930E-002 -2.0701757E-002 2.6232911E-002  
4.9760358E-002 -1.8078829E-002 2.7006943E-002  
4.7698913E-002 -1.5207148E-002 2.7941336E-002  
4.5135803E-002 -1.2325680E-002 2.6946128E-002  
1.7801437E-002 2.4680392E-002 8.1643102E-003  
1.7945714E-002 2.6241595E-002 6.2279900E-003  
1.9107405E-002 2.7977044E-002 4.6604979E-003  
2.0901033E-002 2.9334471E-002 3.4703547E-003  
2.2859309E-002 3.0345938E-002 2.3329131E-003  
2.5044050E-002 3.1183784E-002 1.2386398E-003  
2.7478218E-002 3.1848434E-002 2.0853690E-004  
3.0171061E-002 3.2368353E-002 -7.3987969E-004  
3.3176784E-002 3.2709125E-002 -1.6046425E-003  
3.6527442E-002 3.2760201E-002 -2.2857604E-003  
3.9469793E-002 3.2837627E-002 -2.8575805E-003  
4.2039331E-002 3.2033688E-002 -2.7045243E-003  
4.4653688E-002 3.1154917E-002 -2.4532727E-003  
4.7172309E-002 2.9936029E-002 -1.9505739E-003  
4.9617175E-002 2.8488150E-002 -1.1959431E-003  
5.2000243E-002 2.6704893E-002 -1.8379765E-004  
5.4329390E-002 2.4599109E-002 1.1007479E-003  
5.6572794E-002 2.2170965E-002 2.6512955E-003  
5.8494817E-002 1.9332432E-002 4.5884718E-003  
6.0900806E-002 1.4381346E-002 7.7893099E-003  
6.1915987E-002 9.8543968E-003 1.1024103E-002  
6.2023411E-002 5.8478026E-003 1.3950961E-002  
6.1387836E-002 2.3765156E-003 1.6540765E-002  
6.0119715E-002 -6.2615448E-004 1.8821973E-002  
5.8285179E-002 -3.3203014E-003 2.0820667E-002  
5.5607746E-002 -5.7332140E-003 2.2539631E-002

5.1886407E-002 -7.4528068E-003 2.4003001E-002  
4.7361961E-002 -7.8573255E-003 2.5266688E-002  
4.0904535E-002 -6.9773666E-003 2.4625782E-002  
3.5288347E-002 -5.7775156E-003 2.3908934E-002  
3.0474091E-002 -4.3381255E-003 2.3117453E-002  
2.6405270E-002 -2.8837857E-003 2.2152899E-002  
2.3065139E-002 -1.2029195E-003 2.1047298E-002  
2.0666286E-002 1.3132984E-003 2.0000480E-002  
1.9494461E-002 4.5769800E-003 1.9096592E-002  
1.8717835E-002 7.7002536E-003 1.7826773E-002  
1.8203403E-002 1.1026717E-002 1.6236368E-002  
1.8624437E-002 1.2578420E-002 1.5386319E-002  
1.9516233E-002 1.4213073E-002 1.4927435E-002  
2.0167284E-002 1.5786042E-002 1.4381592E-002  
2.0593421E-002 1.7360974E-002 1.3750774E-002  
2.0584713E-002 1.8871963E-002 1.2883633E-002  
2.0107206E-002 2.0300190E-002 1.1770845E-002  
1.9398284E-002 2.1669330E-002 1.0569794E-002  
1.8565448E-002 2.3122706E-002 9.4059741E-003  
1.1763876E-002 2.4909624E-002 7.0261401E-003  
1.2630619E-002 2.7108721E-002 5.7550897E-003  
1.4008577E-002 2.8961370E-002 4.5152733E-003  
1.5689183E-002 3.0564251E-002 3.3196596E-003  
1.7671894E-002 3.1778308E-002 2.1931831E-003  
1.9808573E-002 3.2859199E-002 1.0790320E-003  
2.2201808E-002 3.3632631E-002 8.4034201E-006  
2.4800392E-002 3.4301789E-002 -1.0405651E-003  
2.7616227E-002 3.4868678E-002 -2.0828989E-003  
3.0677311E-002 3.5267864E-002 -3.0878107E-003  
3.2773979E-002 3.5379860E-002 -3.7664596E-003  
3.4875522E-002 3.5352926E-002 -4.2763723E-003  
3.7017529E-002 3.5269521E-002 -4.6982956E-003  
3.9183107E-002 3.5017064E-002 -4.8992186E-003  
4.1330967E-002 3.4495247E-002 -4.8684697E-003  
4.3520481E-002 3.3910012E-002 -4.7078581E-003  
4.5750037E-002 3.3184251E-002 -4.3681463E-003  
4.7972810E-002 3.2260877E-002 -3.8572201E-003  
5.0168124E-002 3.1095032E-002 -3.1379638E-003  
5.2604581E-002 2.9558345E-002 -2.3334212E-003  
5.4769345E-002 2.7755733E-002 -1.3114193E-003  
5.6806503E-002 2.5836236E-002 -1.0740464E-004  
5.8659734E-002 2.3692997E-002 1.2295893E-003  
6.0345830E-002 2.1349756E-002 2.7658067E-003  
6.1865359E-002 1.8822639E-002 4.5030727E-003  
6.3009132E-002 1.6060140E-002 6.4023624E-003  
6.4066490E-002 1.3099881E-002 8.5064621E-003  
6.4665699E-002 9.8276066E-003 1.0682557E-002  
6.4769698E-002 5.8980440E-003 1.3610678E-002  
6.4163953E-002 2.3450495E-003 1.6214597E-002  
6.3080101E-002 -8.4145586E-004 1.8548731E-002  
6.1558750E-002 -3.7032722E-003 2.0687547E-002  
5.9456355E-002 -6.2226104E-003 2.2515217E-002  
5.6652888E-002 -8.2887271E-003 2.3953143E-002  
5.3278766E-002 -9.9817635E-003 2.5157914E-002  
4.9575335E-002 -1.1330305E-002 2.6411356E-002  
4.5135803E-002 -1.2325680E-002 2.6946128E-002  
2.1826305E-002 -5.9500830E-003 -1.6089706E-002  
2.2632542E-002 -5.1130211E-003 -1.7246238E-002  
2.3630147E-002 -3.9603954E-003 -1.8102534E-002  
2.4685412E-002 -2.6884548E-003 -1.8706118E-002

2.5698451E-002 -1.3233856E-003 -1.9145955E-002  
2.6686880E-002 9.8215561E-005 -1.9482977E-002  
2.7645077E-002 1.6074289E-003 -1.9841975E-002  
2.8643362E-002 3.2093566E-003 -2.0057324E-002  
2.9638765E-002 4.9224737E-003 -2.0271338E-002  
3.0639751E-002 6.7220439E-003 -2.0183769E-002  
3.1450215E-002 8.1083920E-003 -2.0104204E-002  
3.2248486E-002 9.4415351E-003 -1.9854599E-002  
3.2979001E-002 1.0813112E-002 -1.9634395E-002  
3.3687703E-002 1.2176350E-002 -1.9292631E-002  
3.4400582E-002 1.3399983E-002 -1.8738936E-002  
3.5050440E-002 1.4749740E-002 -1.8152809E-002  
3.5714672E-002 1.6058491E-002 -1.7417232E-002  
3.6325625E-002 1.7240797E-002 -1.6568857E-002  
3.6939116E-002 1.8493491E-002 -1.5507839E-002  
3.7501645E-002 1.9676154E-002 -1.3974391E-002  
3.7926720E-002 2.0691315E-002 -1.2306086E-002  
3.8143840E-002 2.1472074E-002 -1.0563837E-002  
3.8168678E-002 2.2030490E-002 -8.7307544E-003  
3.8059425E-002 2.2441645E-002 -6.8539505E-003  
3.7809608E-002 2.2710630E-002 -4.9172268E-003  
3.7403950E-002 2.2877995E-002 -2.8898118E-003  
3.6862114E-002 2.2865426E-002 -7.6831604E-004  
3.6153049E-002 2.2595311E-002 1.4136345E-003  
3.4915389E-002 2.1464200E-002 5.2175119E-003  
3.3465567E-002 1.9765066E-002 8.2346144E-003  
3.1933426E-002 1.7930015E-002 1.0586796E-002  
3.0292253E-002 1.5968937E-002 1.2187345E-002  
2.8566322E-002 1.4009594E-002 1.3279571E-002  
2.6763459E-002 1.1959691E-002 1.3720654E-002  
2.4873036E-002 9.7198285E-003 1.3452022E-002  
2.2874766E-002 7.3850699E-003 1.2306666E-002  
2.0702803E-002 4.9880914E-003 1.0934338E-002  
1.9632587E-002 2.6396153E-003 9.7557021E-003  
1.8728038E-002 4.8719268E-004 8.6645349E-003  
1.7938615E-002 -1.3974268E-003 7.4733677E-003  
1.7227523E-002 -3.0368894E-003 6.1841306E-003  
1.6917631E-002 -4.4650251E-003 4.7787511E-003  
1.6828188E-002 -5.6889871E-003 3.2881245E-003  
1.6921106E-002 -6.7057363E-003 1.7166405E-003  
1.7119234E-002 -7.5331994E-003 -7.8623306E-005  
1.7785551E-002 -7.9902972E-003 -1.9734066E-003  
1.8353510E-002 -7.6842589E-003 -3.2960966E-003  
1.9187044E-002 -7.1837648E-003 -4.5748910E-003  
2.0000084E-002 -6.6607526E-003 -5.9114457E-003  
2.0652732E-002 -6.2296344E-003 -7.3620854E-003  
2.1092549E-002 -6.0181834E-003 -8.9426958E-003  
2.1248674E-002 -6.0885265E-003 -1.0687562E-002  
2.1286519E-002 -6.3134099E-003 -1.2600044E-002  
2.1331584E-002 -6.4747205E-003 -1.4568591E-002  
2.1095203E-002 -1.0063583E-002 -1.8772614E-002  
2.2388145E-002 -8.5087418E-003 -1.9651659E-002  
2.3600627E-002 -7.0479113E-003 -2.0507158E-002  
2.4702274E-002 -5.5151803E-003 -2.1154449E-002  
2.5728028E-002 -4.0219332E-003 -2.1751542E-002  
2.6663152E-002 -2.5386634E-003 -2.2231758E-002  
2.7475983E-002 -1.0101564E-003 -2.2507289E-002  
2.8207033E-002 4.8816542E-004 -2.2727327E-002  
2.8861776E-002 1.9733546E-003 -2.2883123E-002  
2.9505864E-002 3.4044364E-003 -2.3073582E-002



3.0423153E-002 5.1605144E-003 -2.3126139E-002  
3.1324760E-002 6.8422522E-003 -2.3138594E-002  
3.2167720E-002 8.4888118E-003 -2.2979240E-002  
3.3022628E-002 1.0065367E-002 -2.2754358E-002  
3.3832741E-002 1.1612283E-002 -2.2403536E-002  
3.4571624E-002 1.3091641E-002 -2.1875962E-002  
3.5304589E-002 1.4531842E-002 -2.1249626E-002  
3.5975374E-002 1.5934613E-002 -2.0505463E-002  
3.6629246E-002 1.7272379E-002 -1.9604974E-002  
3.8344229E-002 1.9190416E-002 -1.8473878E-002  
3.8800745E-002 2.0838745E-002 -1.6597384E-002  
3.9213804E-002 2.2313139E-002 -1.4529477E-002  
3.9478683E-002 2.3469782E-002 -1.2254347E-002  
3.9436503E-002 2.4436691E-002 -9.7354596E-003  
3.9239332E-002 2.5033676E-002 -7.1473810E-003  
3.9003145E-002 2.5450289E-002 -4.3829912E-003  
3.8418053E-002 2.5552164E-002 -1.4526917E-003  
3.7800101E-002 2.5570213E-002 1.7597062E-003  
3.6580956E-002 2.4140146E-002 5.8457228E-003  
3.5626542E-002 2.2742817E-002 9.4280578E-003  
3.4233598E-002 2.0964654E-002 1.2208537E-002  
3.2801928E-002 1.9087274E-002 1.4481389E-002  
3.1284755E-002 1.7064470E-002 1.6238330E-002  
2.9632273E-002 1.4835924E-002 1.7456983E-002  
2.7756756E-002 1.2411832E-002 1.8073211E-002  
2.5535290E-002 9.7226876E-003 1.7437523E-002  
2.3227134E-002 6.9944625E-003 1.5967724E-002  
1.0026077E-002 2.7681165E-003 -8.0348624E-003  
9.0713484E-003 3.5703288E-003 -8.4650363E-003  
8.1105370E-003 4.1011981E-003 -8.6786281E-003  
7.1470289E-003 4.4821455E-003 -8.9115037E-003  
6.1705536E-003 4.7137796E-003 -9.0974647E-003  
5.2818860E-003 4.8885849E-003 -9.0751456E-003  
4.3350533E-003 5.2774450E-003 -9.5689761E-003  
3.4590533E-003 4.7417737E-003 -9.2464416E-003  
2.5838454E-003 4.2860403E-003 -9.1701322E-003  
1.6423814E-003 3.7107638E-003 -9.2508820E-003  
7.7071138E-004 3.3545743E-003 -9.1897432E-003  
2.5762412E-005 2.8915147E-003 -9.1210537E-003  
-5.6326256E-004 2.3170749E-003 -9.1275563E-003  
-1.0553701E-003 1.6006148E-003 -9.1975042E-003  
-1.4090371E-003 7.0509574E-004 -9.2707922E-003  
-1.6859735E-003 -2.8965193E-004 -9.4614096E-003  
-1.7537140E-003 -1.5021069E-003 -9.6568061E-003  
-1.5356496E-003 -2.9166218E-003 -9.6803330E-003  
-1.0692306E-003 -4.3892023E-003 -9.5821992E-003  
-1.8211958E-004 -5.2404875E-003 -1.0029274E-002  
7.1570308E-004 -5.9232179E-003 -1.0368928E-002  
1.6258410E-003 -6.3867514E-003 -1.0581960E-002  
2.4786410E-003 -6.6757315E-003 -1.0848104E-002  
3.2883441E-003 -6.7793899E-003 -1.1040651E-002  
4.0816438E-003 -6.7462764E-003 -1.1227542E-002  
4.8812405E-003 -6.5591021E-003 -1.1495614E-002  
5.6895961E-003 -6.1182270E-003 -1.1637690E-002  
6.4149434E-003 -5.4822852E-003 -1.1624595E-002  
7.3285357E-003 -4.8779511E-003 -1.1490773E-002  
8.0520611E-003 -4.1886476E-003 -1.1100100E-002  
8.6808932E-003 -3.4220795E-003 -1.0754195E-002  
9.1686821E-003 -2.6028319E-003 -1.0308043E-002  
9.6185168E-003 -1.6907942E-003 -9.9676687E-003

9.9743811E-003 -6.8402104E-004 -9.6050134E-003  
1.0151547E-002 4.1275769E-004 -9.2010742E-003  
1.0134701E-002 1.5798946E-003 -8.7239099E-003  
-2.6981054E-002 1.8986671E-002 1.6937320E-002  
-2.9846027E-002 2.1472085E-002 1.4900830E-002  
-3.2062968E-002 2.3159170E-002 1.3370106E-002  
-3.4903012E-002 2.4582324E-002 1.0416143E-002  
-3.5666256E-002 2.4269176E-002 8.9104195E-003  
-3.6195839E-002 2.3458738E-002 7.3183004E-003  
-3.6254208E-002 2.1829736E-002 5.4913316E-003  
-3.4328949E-002 -8.4849121E-003 1.7759214E-002  
-3.7064107E-002 -9.2128735E-003 1.6827217E-002  
-3.9175583E-002 -9.8332486E-003 1.6031927E-002  
-4.0545479E-002 -1.0091556E-002 1.4888216E-002  
-4.1886079E-002 -1.0208560E-002 1.2378291E-002  
-4.2077230E-002 -1.0157955E-002 1.0848299E-002  
-4.1855478E-002 -9.9282049E-003 8.9620860E-003  
-1.7353999E-002 -1.7754303E-002 5.4286809E-003  
-1.7821853E-002 -1.9237031E-002 3.8526896E-003  
-1.8261756E-002 -2.0341406E-002 2.5169572E-003  
-1.8801742E-002 -2.1002186E-002 1.2707337E-003  
-2.0216762E-002 -2.0988575E-002 -1.1050536E-003  
-2.1132441E-002 -2.0263112E-002 -2.2015873E-003  
-2.2204403E-002 -1.9105303E-002 -3.2829360E-003  
-3.0151265E-002 9.5101911E-003 1.9712012E-003  
-3.1667992E-002 1.0930330E-002 7.7667287E-004  
-3.2899697E-002 1.1617202E-002 -5.3174386E-004  
-3.3765599E-002 1.1633776E-002 -1.7122639E-003  
-3.4720691E-002 1.0884784E-002 -3.5791573E-003  
-3.4942835E-002 1.0211521E-002 -4.4568053E-003  
-3.5058140E-002 9.3057580E-003 -5.4297092E-003  
-3.6692015E-002 -5.7517336E-003 6.3683019E-003  
-3.8710306E-002 -7.0231451E-003 4.8777318E-003  
-4.0010217E-002 -8.1120961E-003 3.7864817E-003  
-4.0989494E-002 -8.5883549E-003 1.7870131E-003  
-4.1189059E-002 -8.6026022E-003 8.4796396E-004  
-4.1314997E-002 -8.4570555E-003 -2.3050264E-004  
-4.1288363E-002 -8.1137484E-003 -1.5548850E-003  
-2.3149405E-002 -1.3405166E-002 -4.9566938E-004  
-2.2269338E-002 -1.7983047E-002 -2.7716068E-003  
-2.5365956E-002 -1.6295394E-002 -5.7528767E-003  
-2.6381163E-002 -1.6436198E-002 -7.7727614E-003  
-2.6787116E-002 -1.6203413E-002 -8.4802481E-003  
-2.7269901E-002 -1.5950160E-002 -9.1973947E-003  
-2.7902484E-002 -1.5459957E-002 -9.9611262E-003  
1.1625521E-002 1.6018515E-002 6.6175263E-004  
1.1070327E-002 1.5036513E-002 2.8159929E-003  
1.0673412E-002 1.0943614E-002 6.0586947E-003  
5.8942757E-003 1.5159790E-002 2.2269148E-003  
3.7612172E-003 1.5102311E-002 2.7533530E-003  
1.5414398E-003 1.4953435E-002 3.6575372E-003  
-5.6250835E-004 1.4934451E-002 4.3238933E-003  
-2.6966882E-003 1.4510334E-002 5.0524383E-003  
-4.8308292E-003 1.3628460E-002 6.0060329E-003  
-6.9568273E-003 1.2707294E-002 7.0449862E-003  
-8.8024923E-003 1.2050332E-002 7.7700883E-003  
-1.0691776E-002 1.1657782E-002 8.3967072E-003  
-1.2424480E-002 1.1187875E-002 9.0041315E-003  
-1.4096096E-002 1.0760532E-002 9.5868626E-003  
-1.5680174E-002 1.0549864E-002 1.0062764E-002

-1.7194910E-002 1.0257117E-002 1.0532816E-002  
-1.8596630E-002 9.8620272E-003 1.0973601E-002  
-1.9922060E-002 9.5222877E-003 1.1361290E-002  
-2.1015303E-002 8.9677684E-003 1.1800981E-002  
-2.3176554E-002 7.6992457E-003 1.2513707E-002  
-2.4963368E-002 6.2727191E-003 1.3105065E-002  
-2.6461715E-002 4.8272621E-003 1.3523930E-002  
-2.7587199E-002 3.3016119E-003 1.3826781E-002  
-2.8542024E-002 1.8374801E-003 1.4006107E-002  
-2.9014553E-002 1.4654965E-004 1.4062230E-002  
-2.9197929E-002 -1.6095601E-003 1.3948975E-002  
-2.9050162E-002 -3.4221899E-003 1.3723590E-002  
-2.8436649E-002 -5.2887668E-003 1.3490402E-002  
-2.7692033E-002 -6.4551084E-003 1.2915974E-002  
-2.7147164E-002 -7.5676195E-003 1.2264136E-002  
-2.6436719E-002 -8.5199773E-003 1.1544375E-002  
-2.5579155E-002 -9.3566144E-003 1.0779563E-002  
-2.4518442E-002 -9.9659307E-003 9.9636073E-003  
-2.3399878E-002 -1.0458819E-002 8.9998670E-003  
-2.2107626E-002 -1.0770705E-002 8.0321655E-003  
-2.0696017E-002 -1.0901196E-002 6.9647159E-003  
-1.9093374E-002 -1.0719728E-002 5.9572660E-003  
-1.8094274E-002 -8.8979511E-003 1.7088729E-003  
-1.7157194E-002 -5.3126469E-003 -2.4219721E-004  
-1.7571614E-002 -2.1468739E-003 -1.9365627E-004  
-1.8329144E-002 1.4293885E-006 -6.4937425E-004  
-1.9558679E-002 1.6088469E-003 -7.5913141E-004  
-2.1108649E-002 2.9212881E-003 -1.0272390E-003  
-2.3403668E-002 4.2359115E-003 -1.7731097E-003  
-2.6546680E-002 4.6905262E-003 -4.7895839E-004  
-2.8947845E-002 4.0387665E-003 1.7516790E-003  
-3.2171026E-002 1.5257068E-003 1.6908563E-003  
-3.3357548E-002 -1.4267840E-003 2.2055325E-003  
-3.3057732E-002 -3.7428388E-003 1.7408067E-003  
-3.2348208E-002 -4.7716338E-003 1.1597935E-003  
-3.1680260E-002 -5.6988056E-003 4.4506668E-004  
-3.1353210E-002 -6.8042700E-003 -9.0353722E-004  
-3.0710583E-002 -8.3003329E-003 -3.0740171E-003  
-2.7816072E-002 -8.3362381E-003 -5.8553987E-003  
-2.4594469E-002 -5.7320686E-003 -5.3228220E-003  
-2.9320339E-002 -4.2257911E-003 -9.4259612E-003  
-3.2992469E-002 -8.4042495E-004 -9.0720469E-003  
-3.3902892E-002 4.5853051E-004 -7.7020018E-003  
-3.3096185E-002 -9.1124851E-005 -6.0840087E-003  
-3.2522605E-002 -4.7132781E-004 -5.7414399E-003  
-3.1763166E-002 -4.9196212E-004 -6.6522962E-003  
-2.5962757E-002 -1.0630509E-003 -7.9094088E-003  
-3.3113022E-002 3.4176566E-003 -1.0484055E-002  
-6.3038119E-003 2.9074466E-002 1.7295933E-002  
-7.7577826E-003 2.7690564E-002 1.6702250E-002  
-9.4664823E-003 2.6261854E-002 1.6006631E-002  
-1.1313058E-002 2.4841855E-002 1.5492176E-002  
-1.3223321E-002 2.3371074E-002 1.5034157E-002  
-1.5222952E-002 2.1879171E-002 1.4820622E-002  
-1.7281178E-002 2.0316448E-002 1.5018342E-002  
-1.9434900E-002 1.8698649E-002 1.5471791E-002  
-2.1770311E-002 1.7031076E-002 1.5988099E-002  
-2.4169133E-002 1.5294660E-002 1.6750865E-002  
-2.6422935E-002 1.3032437E-002 1.7600618E-002  
-2.8340865E-002 1.0713591E-002 1.8189711E-002

-2.9923092E-002 8.3521266E-003 1.8553236E-002  
-3.1153923E-002 5.9426580E-003 1.8735674E-002  
-3.2026024E-002 3.4601185E-003 1.8688732E-002  
-3.2504784E-002 8.8939251E-004 1.8509837E-002  
-3.2623960E-002 -1.7531453E-003 1.8127956E-002  
-3.2315795E-002 -4.4871158E-003 1.7664885E-002  
-3.1553615E-002 -7.2664853E-003 1.7111514E-002  
-3.0370374E-002 -9.4742230E-003 1.6320971E-002  
-2.9097603E-002 -1.1337630E-002 1.5373086E-002  
-2.7669283E-002 -1.2909808E-002 1.4460135E-002  
-2.6185635E-002 -1.4146376E-002 1.3361463E-002  
-2.4570548E-002 -1.5091969E-002 1.2259500E-002  
-2.2860839E-002 -1.5721665E-002 1.1050618E-002  
-2.1058768E-002 -1.6031958E-002 9.7458175E-003  
-1.9196812E-002 -1.6025345E-002 8.3071381E-003  
-1.7246299E-002 -1.5763104E-002 6.8038185E-003  
-1.4788566E-002 -1.3379661E-002 4.8389264E-003  
-1.3128594E-002 -1.0922070E-002 3.0254797E-003  
-1.2036189E-002 -8.4657542E-003 1.5214721E-003  
-1.1643805E-002 -6.0353439E-003 2.2798152E-004  
-1.1806171E-002 -3.6094293E-003 -7.3032203E-004  
-1.2597072E-002 -1.1488298E-003 -1.3693027E-003  
-1.3938075E-002 1.3717950E-003 -1.6644214E-003  
-1.5892943E-002 3.9383107E-003 -1.5836089E-003  
-1.8587167E-002 6.4247657E-003 -1.3846358E-003  
-2.1243620E-002 7.1774905E-003 -6.3930500E-004  
-2.3647954E-002 7.6575076E-003 1.6751673E-004  
-2.5786975E-002 7.8690332E-003 1.0620212E-003  
-2.7743494E-002 7.7422588E-003 1.8720648E-003  
-2.9473866E-002 7.3322416E-003 2.7042327E-003  
-3.1058422E-002 6.5660888E-003 3.4053593E-003  
-3.2441930E-002 5.5272198E-003 4.1280438E-003  
-3.3590533E-002 4.2122008E-003 4.7501495E-003  
-3.4487836E-002 2.5766277E-003 5.1827935E-003  
-3.4912206E-002 8.0350230E-004 4.9948198E-003  
-3.5220849E-002 -8.9575421E-004 4.7275231E-003  
-3.5033750E-002 -2.4694651E-003 4.4197332E-003  
-3.4753468E-002 -3.9118237E-003 4.1906464E-003  
-3.4336928E-002 -5.2720070E-003 3.8185267E-003  
-3.3779608E-002 -6.4898274E-003 3.3955233E-003  
-3.2693654E-002 -7.4414248E-003 3.2457956E-003  
-3.1992491E-002 -8.4410698E-003 2.0733901E-003  
-3.1114882E-002 -9.3498224E-003 9.7594008E-004  
-2.9756091E-002 -9.8957631E-003 2.9316574E-004  
-2.8509023E-002 -1.0189373E-002 -3.3961925E-004  
-2.7576703E-002 -1.0218914E-002 -1.1116873E-003  
-2.6323738E-002 -9.9722691E-003 -1.7706840E-003  
-2.5439866E-002 -9.4126186E-003 -2.5455855E-003  
-2.4670038E-002 -8.5893418E-003 -3.3362713E-003  
-2.4061619E-002 -7.4994716E-003 -4.1584347E-003  
-2.3526904E-002 -6.1999880E-003 -5.0097933E-003  
-2.3196251E-002 -4.6652744E-003 -6.0156430E-003  
-2.6187364E-002 -3.2912984E-003 -7.5835970E-003  
-2.9237448E-002 -1.9974342E-003 -1.0164485E-002  
-2.9699929E-002 3.2814746E-005 -7.1146589E-003  
-3.0263267E-002 1.2294559E-003 -5.9118066E-003  
-3.1071304E-002 1.9816182E-003 -6.1342510E-003  
-3.1519148E-002 3.2485580E-003 -5.1816204E-003  
-3.0721992E-002 5.2116892E-003 -4.3910384E-003  
-3.3414128E-002 5.7654074E-003 -1.0952989E-002

1.3555846E-002 1.5589336E-002 -2.1537917E-003  
1.2513546E-002 1.5168603E-002 -4.1177818E-003  
1.1265562E-002 1.4623337E-002 -5.7869800E-003  
9.9565595E-003 1.4279916E-002 -7.2662793E-003  
8.3964721E-003 1.4133777E-002 -8.3827457E-003  
6.8370646E-003 1.4308928E-002 -9.4381838E-003  
5.2765340E-003 1.4746188E-002 -1.0437409E-002  
3.6636927E-003 1.5421954E-002 -1.1317711E-002  
2.0438359E-003 1.6355315E-002 -1.2134761E-002  
3.1315117E-004 1.7487726E-002 -1.2760288E-002  
-1.3697397E-003 1.9033122E-002 -1.2944303E-002  
-3.0413019E-003 2.0469930E-002 -1.2974424E-002  
-4.7057665E-003 2.1769409E-002 -1.2856465E-002  
-6.3269083E-003 2.2974869E-002 -1.2649543E-002  
-7.9485926E-003 2.4022667E-002 -1.2269856E-002  
-9.5424803E-003 2.4973375E-002 -1.1789195E-002  
-1.1143063E-002 2.5744359E-002 -1.1180179E-002  
-1.2701249E-002 2.6431375E-002 -1.0484345E-002  
-1.4227624E-002 2.7015404E-002 -9.7031750E-003  
-1.6212970E-002 2.7826240E-002 -8.6672207E-003  
-1.8118525E-002 2.8500267E-002 -7.5322570E-003  
-1.9880517E-002 2.9081123E-002 -6.3753729E-003  
-2.1540366E-002 2.9506709E-002 -5.1662280E-003  
-2.3091913E-002 2.9804479E-002 -3.9223756E-003  
-2.4531537E-002 2.9973895E-002 -2.6519073E-003  
-2.5841663E-002 3.0068324E-002 -1.3188316E-003  
-2.7020750E-002 3.0006783E-002 4.6916895E-005  
-2.8079172E-002 2.9867611E-002 1.4625360E-003  
-2.9362018E-002 2.9301432E-002 3.8533810E-003  
-3.0703669E-002 2.8418485E-002 6.0911852E-003  
-3.2083445E-002 2.7148623E-002 8.2059721E-003  
-3.3606152E-002 2.5553810E-002 1.0237837E-002  
-3.5261125E-002 2.3540183E-002 1.2191483E-002  
-3.6982110E-002 2.0952622E-002 1.4007380E-002  
-3.8712981E-002 1.7762072E-002 1.5604137E-002  
-4.0382901E-002 1.3952132E-002 1.6921205E-002  
-4.1769941E-002 9.5613347E-003 1.7706522E-002  
-4.3007518E-002 4.3988700E-003 1.7628910E-002  
-4.3338111E-002 -4.3522677E-004 1.7055621E-002  
-4.2789232E-002 -4.7202680E-003 1.6053648E-002  
-4.1789862E-002 -8.4918035E-003 1.4940313E-002  
-4.0209773E-002 -1.1753692E-002 1.3669006E-002  
-3.8148560E-002 -1.4608579E-002 1.2265567E-002  
-3.5544356E-002 -1.7048278E-002 1.0706122E-002  
-3.2370487E-002 -1.9073979E-002 8.9900711E-003  
-2.8636472E-002 -2.0661916E-002 7.0460054E-003  
-2.6265913E-002 -2.1429497E-002 5.5678785E-003  
-2.4045474E-002 -2.1757299E-002 4.1125349E-003  
-2.1975263E-002 -2.1752056E-002 2.6988954E-003  
-2.0032609E-002 -2.1462340E-002 1.3289279E-003  
-1.8216182E-002 -2.0813631E-002 3.6183408E-006  
-1.6536372E-002 -1.9788151E-002 -1.3129607E-003  
-1.5030694E-002 -1.8351822E-002 -2.5690471E-003  
-1.3638656E-002 -1.6599179E-002 -3.8072673E-003  
-1.2465160E-002 -1.4441885E-002 -4.9745378E-003  
-1.1657797E-002 -1.2038481E-002 -6.0382768E-003  
-1.1202801E-002 -9.6292229E-003 -6.9143216E-003  
-1.1103036E-002 -7.2168018E-003 -7.5866170E-003  
-1.1230972E-002 -4.8184613E-003 -8.1281944E-003  
-1.1563396E-002 -2.4219202E-003 -8.5640789E-003

-1.2207556E-002 2.9138479E-005 -8.8214676E-003  
-1.3207347E-002 2.5074777E-003 -8.8688713E-003  
-1.4639782E-002 4.9456144E-003 -8.6754432E-003  
-1.6498871E-002 7.2339799E-003 -8.2696304E-003  
-1.8258818E-002 8.7968451E-003 -8.0048912E-003  
-2.0079099E-002 1.0046057E-002 -7.6430452E-003  
-2.1916215E-002 1.1067503E-002 -7.1784032E-003  
-2.3803317E-002 1.1844277E-002 -6.6189394E-003  
-2.5711236E-002 1.2494930E-002 -5.9657991E-003  
-2.7727620E-002 1.2798095E-002 -5.1994256E-003  
-2.9827834E-002 1.2759141E-002 -4.3086271E-003  
-3.1961828E-002 1.2347583E-002 -3.3210033E-003  
-3.4080059E-002 1.1521483E-002 -2.2201500E-003  
-3.6349850E-002 1.0166538E-002 -8.5025745E-004  
-3.8145714E-002 8.3968833E-003 2.7843959E-004  
-3.9539261E-002 6.4419167E-003 1.1774011E-003  
-4.0632707E-002 4.3769177E-003 1.8758939E-003  
-4.1390895E-002 2.1510985E-003 2.3771443E-003  
-4.1892532E-002 -2.3763568E-004 2.7226814E-003  
-4.1985363E-002 -2.8418103E-003 2.8246530E-003  
-4.1689216E-002 -5.6376106E-003 2.6874585E-003  
-4.0833613E-002 -8.5254634E-003 2.2397078E-003  
-3.9793619E-002 -1.0715930E-002 1.7503502E-003  
-3.8497663E-002 -1.2521986E-002 1.0702768E-003  
-3.7086718E-002 -1.4022985E-002 2.5634329E-004  
-3.5558740E-002 -1.5192033E-002 -6.7675694E-004  
-3.3966451E-002 -1.6116520E-002 -1.7630383E-003  
-3.2239411E-002 -1.6811264E-002 -2.9875575E-003  
-3.0338704E-002 -1.7159856E-002 -4.3332134E-003  
-2.8293769E-002 -1.7077106E-002 -5.7942297E-003  
-2.6169904E-002 -1.6501646E-002 -7.3772509E-003  
-2.2428144E-002 -1.3811146E-002 -1.0722612E-002  
-2.0572209E-002 -9.9840510E-003 -1.2879280E-002  
-2.0060466E-002 -6.7351111E-003 -1.4120432E-002  
-2.0367074E-002 -4.1275253E-003 -1.4972298E-002  
-2.1408648E-002 -1.8080389E-003 -1.5683034E-002  
-2.3459237E-002 5.8751574E-004 -1.6323916E-002  
-2.7259821E-002 3.0129552E-003 -1.6221280E-002  
-3.2891950E-002 4.8225907E-003 -1.4270734E-002  
-3.7928754E-002 4.3325712E-003 -1.0073300E-002  
-3.9750853E-002 -3.1585408E-003 -1.0769689E-002  
-3.9939559E-002 -9.8776235E-003 -9.3667716E-003  
-3.8603368E-002 -1.2714142E-002 -8.4372595E-003  
-3.7562841E-002 -1.3999450E-002 -8.2911403E-003  
-3.6678746E-002 -1.4394043E-002 -8.7893013E-003  
-3.5822257E-002 -1.4170452E-002 -1.0175288E-002  
-3.4622705E-002 -1.1815175E-002 -1.2492963E-002  
-3.1975205E-002 -4.6540449E-003 -1.4514266E-002  
2.8124186E-003 -1.1727229E-002 -3.0381147E-003  
9.7659849E-004 -1.0558790E-002 -3.0622482E-003  
-6.2510679E-004 -9.2123085E-003 -3.2051600E-003  
-2.0810009E-003 -7.6881164E-003 -3.5378454E-003  
-3.2858811E-003 -5.9069011E-003 -3.9527488E-003  
-4.2184205E-003 -3.8661454E-003 -4.4674254E-003  
-4.9139688E-003 -1.5436130E-003 -5.1111790E-003  
-5.4963757E-003 1.0174224E-003 -5.9185285E-003  
-6.2065072E-003 3.5216019E-003 -7.1238277E-003  
-7.0063414E-003 5.9168360E-003 -8.8796309E-003  
-7.2866017E-003 7.7589263E-003 -1.0321394E-002  
-8.0296973E-003 9.3802057E-003 -1.1649587E-002

-9.0096510E-003 1.0954275E-002 -1.2654973E-002  
-1.0260159E-002 1.2509521E-002 -1.3432185E-002  
-1.1715545E-002 1.4017013E-002 -1.3644309E-002  
-1.3442326E-002 1.5528305E-002 -1.3659244E-002  
-1.5385621E-002 1.7047383E-002 -1.3343944E-002  
-1.7577798E-002 1.8481032E-002 -1.2655964E-002  
-2.0013509E-002 1.9880986E-002 -1.1617985E-002  
-2.2345310E-002 2.0705594E-002 -1.0294449E-002  
-2.4457552E-002 2.1356332E-002 -8.7712484E-003  
-2.6403535E-002 2.1810861E-002 -7.1489549E-003  
-2.8106249E-002 2.2043725E-002 -5.3756587E-003  
-2.9689465E-002 2.2024966E-002 -3.5519636E-003  
-3.1150604E-002 2.1726700E-002 -1.6747933E-003  
-3.2576822E-002 2.1172082E-002 1.9354768E-004  
-3.3984213E-002 2.0362288E-002 2.0392030E-003  
-3.5390627E-002 1.9325596E-002 3.8086177E-003  
-3.7488995E-002 1.6369456E-002 5.7342297E-003  
-3.9317844E-002 1.3354837E-002 7.1536397E-003  
-4.0878482E-002 1.0328910E-002 8.0458710E-003  
-4.2037741E-002 7.2415080E-003 8.5929643E-003  
-4.2767457E-002 4.0769763E-003 8.8101761E-003  
-4.3067395E-002 8.3047005E-004 8.7025329E-003  
-4.2853845E-002 -2.5204808E-003 8.3525884E-003  
-4.2094629E-002 -5.9475202E-003 7.7882023E-003  
-4.0766175E-002 -9.3773656E-003 7.0446807E-003  
-3.9239979E-002 -1.1751753E-002 6.3115507E-003  
-3.7488744E-002 -1.3746167E-002 5.5580433E-003  
-3.5595173E-002 -1.5346495E-002 4.6953624E-003  
-3.3673460E-002 -1.6610098E-002 3.6324093E-003  
-3.1703073E-002 -1.7560807E-002 2.3835534E-003  
-2.9645849E-002 -1.8157982E-002 9.9846966E-004  
-2.7533061E-002 -1.8436109E-002 -5.6837777E-004  
-2.5310620E-002 -1.8359344E-002 -2.2247915E-003  
-2.3004384E-002 -1.7942954E-002 -4.0234999E-003  
-2.0875035E-002 -1.6818362E-002 -5.7373520E-003  
-1.9007538E-002 -1.5295303E-002 -7.0011314E-003  
-1.7534447E-002 -1.3453146E-002 -7.8437841E-003  
-1.6506536E-002 -1.1458951E-002 -8.6699506E-003  
-1.5976739E-002 -9.2915537E-003 -9.3603623E-003  
-1.5814902E-002 -6.9669883E-003 -1.0127260E-002  
-1.6109995E-002 -4.4661056E-003 -1.0874219E-002  
-1.6833543E-002 -1.7582577E-003 -1.1555756E-002  
-1.8000962E-002 1.1585564E-003 -1.1888561E-002  
-1.9430341E-002 3.2934882E-003 -1.1950477E-002  
-2.0978219E-002 5.0639163E-003 -1.1727900E-002  
-2.2647406E-002 6.5208295E-003 -1.1471259E-002  
-2.4423413E-002 7.6273447E-003 -1.1017808E-002  
-2.6308971E-002 8.3900061E-003 -1.0407738E-002  
-2.8277646E-002 8.7775603E-003 -9.5728243E-003  
-3.0397951E-002 8.8774735E-003 -8.7112861E-003  
-3.2650246E-002 8.6454155E-003 -7.7099766E-003  
-3.4947484E-002 8.0229805E-003 -6.4241706E-003  
-3.6633877E-002 7.0101229E-003 -5.4710389E-003  
-3.8102125E-002 5.8128410E-003 -4.7343894E-003  
-3.9260966E-002 4.4226309E-003 -4.0795009E-003  
-4.0167887E-002 2.8802926E-003 -3.5717224E-003  
-4.0820765E-002 1.1640075E-003 -3.1954073E-003  
-4.1286516E-002 -7.1164441E-004 -2.9901529E-003  
-4.1565363E-002 -2.7697681E-003 -2.9949606E-003  
-4.1238286E-002 -5.0525254E-003 -2.8959554E-003

-4.0804842E-002 -7.4630566E-003 -3.0477685E-003  
-3.9836044E-002 -9.6695876E-003 -3.3329215E-003  
-3.8695536E-002 -1.1487984E-002 -3.6788649E-003  
-3.7426388E-002 -1.2915830E-002 -4.1571254E-003  
-3.6158249E-002 -1.4037940E-002 -4.8674351E-003  
-3.4813236E-002 -1.4819524E-002 -5.7334444E-003  
-3.3359998E-002 -1.5221650E-002 -6.7063343E-003  
-3.1910386E-002 -1.5369918E-002 -7.9210445E-003  
-3.0358743E-002 -1.5128809E-002 -9.2649700E-003  
-2.8724504E-002 -1.4526007E-002 -1.0744043E-002  
-2.6688984E-002 -1.2651439E-002 -1.2980325E-002  
-2.5166044E-002 -1.0572410E-002 -1.4312385E-002  
-2.4390641E-002 -8.5844921E-003 -1.5466988E-002  
-2.4349330E-002 -6.7277151E-003 -1.6208114E-002  
-2.5034595E-002 -5.0329839E-003 -1.6695315E-002  
-2.6551343E-002 -3.6338914E-003 -1.7280383E-002  
-2.8706129E-002 -2.5248606E-003 -1.7062381E-002  
-3.0898819E-002 -1.3138729E-003 -1.3946080E-002  
-3.5118697E-002 8.4069347E-004 -1.3550527E-002  
-3.4668022E-002 -4.5677243E-003 -1.1785077E-002  
-3.4575124E-002 -7.4329243E-003 -1.0188181E-002  
-3.6229359E-002 -9.3867069E-003 -1.1138043E-002  
-3.6283763E-002 -1.0661875E-002 -1.1475198E-002  
-3.5878623E-002 -1.0822779E-002 -1.1945373E-002  
-3.5100072E-002 -9.7417800E-003 -1.2733879E-002  
-3.3788927E-002 -7.1177712E-003 -1.3710197E-002  
-3.1442174E-002 -2.2034289E-003 -1.4616924E-002  
1.2019423E-002 -3.5285757E-003 1.8578664E-002  
1.5276403E-002 -5.4860538E-003 2.0376799E-002  
1.8677523E-002 -7.3129997E-003 2.1808787E-002  
2.2116658E-002 -8.9829024E-003 2.3120402E-002  
2.5688486E-002 -1.0412720E-002 2.4648798E-002  
2.9345441E-002 -1.1736492E-002 2.5791974E-002  
3.3275708E-002 -1.2661780E-002 2.6454271E-002  
3.7293254E-002 -1.3825911E-002 2.7506155E-002  
4.1365886E-002 -1.4663095E-002 2.8366489E-002  
4.5590310E-002 -1.5472066E-002 2.9171535E-002

'Coordinates for shape change graph for 'PC1' from 'PCA: CovMatrix,  
Tragulidae, Procrustes coordinates' in the MorphoJ project named 'new  
project...'

'The scale factor used for the shape change is -0.1

'Generated by MorphoJ, version 1.06d

1 2L 2058 1 9999 Dim=3

starting\_shape

PC1 hypothetical value -0.1

4.0608703E-002 -9.7871335E-003 2.3029292E-002  
2.4114897E-002 -2.8573231E-002 -1.0973601E-002  
2.5321920E-002 -2.9503887E-002 -1.2744875E-002  
2.7011522E-002 -3.0666583E-002 -1.3812276E-002  
2.8852052E-002 -3.1748846E-002 -1.4363195E-002  
3.0810386E-002 -3.2755895E-002 -1.4528125E-002  
3.2925174E-002 -3.3723074E-002 -1.4335492E-002  
3.5241587E-002 -3.4672314E-002 -1.3777389E-002  
3.7756438E-002 -3.5606888E-002 -1.2854293E-002  
4.0454369E-002 -3.6498515E-002 -1.1482194E-002



4.3231319E-002 -3.7293054E-002 -9.5247877E-003  
4.5801849E-002 -3.7987752E-002 -7.1808873E-003  
4.7988393E-002 -3.8228121E-002 -4.6576194E-003  
4.9720656E-002 -3.8131321E-002 -2.0133942E-003  
5.1107868E-002 -3.7715626E-002 7.1402955E-004  
5.2118292E-002 -3.7015534E-002 3.3512582E-003  
5.2786404E-002 -3.5982675E-002 6.1266717E-003  
5.3210546E-002 -3.4612294E-002 9.0816613E-003  
5.3179410E-002 -3.2910324E-002 1.2050018E-002  
5.2695567E-002 -3.0880906E-002 1.5066584E-002  
5.1622200E-002 -2.7949433E-002 1.8004775E-002  
4.9971551E-002 -2.5144339E-002 2.0274598E-002  
4.7827436E-002 -2.2490358E-002 2.1898818E-002  
4.5233021E-002 -1.9951857E-002 2.2896139E-002  
4.2160571E-002 -1.7542229E-002 2.3242681E-002  
3.8569481E-002 -1.5304769E-002 2.2901458E-002  
3.4549415E-002 -1.3138546E-002 2.1927896E-002  
3.0103048E-002 -1.0862733E-002 2.0437527E-002  
2.5148579E-002 -8.8191935E-003 1.8249646E-002  
2.3144366E-002 -7.8409346E-003 1.6791539E-002  
2.1441702E-002 -7.2571906E-003 1.5280402E-002  
2.0106091E-002 -7.2326208E-003 1.3671190E-002  
1.9203879E-002 -7.7812080E-003 1.1990936E-002  
1.8665150E-002 -8.8043618E-003 1.0246202E-002  
1.8484485E-002 -1.0331841E-002 8.4276930E-003  
1.8540212E-002 -1.2296599E-002 6.4736948E-003  
1.8837079E-002 -1.4753106E-002 4.3271425E-003  
1.9760022E-002 -1.7756764E-002 2.3201477E-003  
2.0987196E-002 -1.9517981E-002 1.7621757E-003  
2.2257046E-002 -2.1187247E-002 1.2057654E-003  
2.3249589E-002 -2.2696151E-002 2.9337603E-004  
2.3963252E-002 -2.4044517E-002 -9.1885541E-004  
2.4434507E-002 -2.5236517E-002 -2.4030918E-003  
2.4664563E-002 -2.6293304E-002 -4.1531026E-003  
2.4580030E-002 -2.7144756E-002 -6.2400791E-003  
2.4222122E-002 -2.7740358E-002 -8.6554506E-003  
1.7969908E-002 -2.8019034E-002 -1.5356180E-002  
2.0014581E-002 -2.9296105E-002 -1.6830318E-002  
2.2282921E-002 -3.0487875E-002 -1.7799803E-002  
2.4644739E-002 -3.1588256E-002 -1.8340109E-002  
2.7045132E-002 -3.2708437E-002 -1.8624664E-002  
2.9501803E-002 -3.3748587E-002 -1.8562197E-002  
3.2033870E-002 -3.4770009E-002 -1.8188504E-002  
3.4640345E-002 -3.5740041E-002 -1.7468159E-002  
3.7330328E-002 -3.6700492E-002 -1.6427402E-002  
4.0091568E-002 -3.7589098E-002 -1.5010781E-002  
4.2021600E-002 -3.8224858E-002 -1.3782042E-002  
4.3843264E-002 -3.8720695E-002 -1.2419099E-002  
4.5557229E-002 -3.9127631E-002 -1.0956925E-002  
4.7178010E-002 -3.9443075E-002 -9.3913309E-003  
4.8700464E-002 -3.9660446E-002 -7.7067636E-003  
5.0130505E-002 -3.9777878E-002 -5.8914132E-003  
5.1435185E-002 -3.9747319E-002 -3.9275736E-003  
5.2635967E-002 -3.9608342E-002 -1.8333096E-003  
5.3641369E-002 -3.9233778E-002 4.0392323E-004  
5.4440963E-002 -3.8754274E-002 2.5707880E-003  
5.5045962E-002 -3.8101561E-002 4.6821648E-003  
5.5495398E-002 -3.7340561E-002 6.7234026E-003  
5.5811012E-002 -3.6477119E-002 8.7025246E-003  
5.5953064E-002 -3.5497184E-002 1.0609842E-002

5.6001785E-002 -3.4438263E-002 1.2474337E-002  
5.5877844E-002 -3.3250041E-002 1.4270213E-002  
5.5616957E-002 -3.1949296E-002 1.6000999E-002  
5.5174978E-002 -3.0512364E-002 1.7641135E-002  
5.4529313E-002 -2.8543154E-002 1.9609758E-002  
5.3546221E-002 -2.6521139E-002 2.1329978E-002  
5.2250887E-002 -2.4393782E-002 2.2879139E-002  
5.0561233E-002 -2.2155578E-002 2.4146766E-002  
4.8495049E-002 -1.9790331E-002 2.5118478E-002  
4.6025220E-002 -1.7301904E-002 2.5692058E-002  
4.3213911E-002 -1.4695145E-002 2.5966899E-002  
4.0100885E-002 -1.1917023E-002 2.6422887E-002  
3.6594325E-002 -9.1103374E-003 2.6376031E-002  
1.9356807E-002 2.4765107E-002 6.1950640E-003  
2.0305571E-002 2.5993149E-002 4.4721739E-003  
2.1851884E-002 2.7303785E-002 3.1276342E-003  
2.3721848E-002 2.8354086E-002 2.1362320E-003  
2.5700161E-002 2.9127446E-002 1.3332189E-003  
2.7759379E-002 2.9727923E-002 6.2817186E-004  
2.9945701E-002 3.0170701E-002 3.5932138E-005  
3.2284650E-002 3.0506406E-002 -4.9724910E-004  
3.4803868E-002 3.0670915E-002 -8.8636274E-004  
3.7494576E-002 3.0615454E-002 -1.0852455E-003  
4.0026087E-002 3.0072002E-002 -9.9585837E-004  
4.2550469E-002 2.9576649E-002 -9.3729335E-004  
4.4835615E-002 2.8731121E-002 -5.7232683E-004  
4.6920304E-002 2.7651385E-002 2.5528878E-005  
4.8872060E-002 2.6377664E-002 7.7476574E-004  
5.0700654E-002 2.4887122E-002 1.6827618E-003  
5.2362607E-002 2.3179036E-002 2.8033686E-003  
5.3873747E-002 2.1219088E-002 4.1037817E-003  
5.5107557E-002 1.9019741E-002 5.6518274E-003  
5.6354670E-002 1.5249092E-002 8.1271149E-003  
5.6686863E-002 1.1745166E-002 1.0572854E-002  
5.6263888E-002 8.6541368E-003 1.2871620E-002  
5.5233370E-002 5.9167501E-003 1.4963524E-002  
5.3654049E-002 3.4586062E-003 1.6857551E-002  
5.1546912E-002 1.1859374E-003 1.8574710E-002  
4.8733847E-002 -7.8278263E-004 2.0141291E-002  
4.5154637E-002 -2.2842375E-003 2.1554118E-002  
4.0914386E-002 -3.0702949E-003 2.2832292E-002  
3.5972312E-002 -3.1914287E-003 2.2270854E-002  
3.1590063E-002 -2.7425333E-003 2.1650006E-002  
2.7827716E-002 -1.8569454E-003 2.0990218E-002  
2.4623890E-002 -8.1027675E-004 2.0242906E-002  
2.1966506E-002 5.1537830E-004 1.9407850E-002  
1.9890226E-002 2.3098475E-003 1.8533815E-002  
1.8452094E-002 4.5644453E-003 1.7605542E-002  
1.7502223E-002 7.1510459E-003 1.6505577E-002  
1.7280327E-002 1.0085901E-002 1.5641726E-002  
1.8206500E-002 1.1947892E-002 1.5487361E-002  
1.9234613E-002 1.3784783E-002 1.5353621E-002  
1.9991477E-002 1.5558139E-002 1.4905683E-002  
2.0516198E-002 1.7257458E-002 1.4176697E-002  
2.0797577E-002 1.8895391E-002 1.3173241E-002  
2.0842204E-002 2.0488659E-002 1.1900275E-002  
2.0492066E-002 2.1948201E-002 1.0202855E-002  
1.9777636E-002 2.3267028E-002 8.1392709E-003  
1.2137528E-002 2.6255787E-002 4.6683279E-003  
1.3576774E-002 2.7799233E-002 3.5122662E-003

1.5341149E-002 2.9080029E-002 2.4511919E-003  
1.7300965E-002 3.0140391E-002 1.4822245E-003  
1.9392238E-002 3.1051946E-002 5.9048138E-004  
2.1618856E-002 3.1808472E-002 -2.2455537E-004  
2.3973898E-002 3.2469333E-002 -9.6368114E-004  
2.6474596E-002 3.3014446E-002 -1.6395860E-003  
2.9120669E-002 3.3451651E-002 -2.2465994E-003  
3.1918664E-002 3.3728916E-002 -2.7642755E-003  
3.4198262E-002 3.3814823E-002 -3.0921664E-003  
3.6441019E-002 3.3648544E-002 -3.2707861E-003  
3.8610125E-002 3.3333993E-002 -3.2692791E-003  
4.0737854E-002 3.2891820E-002 -3.1692096E-003  
4.2821917E-002 3.2266912E-002 -2.9557314E-003  
4.4848869E-002 3.1527368E-002 -2.6020090E-003  
4.6822079E-002 3.0632641E-002 -2.1029154E-003  
4.8775202E-002 2.9595645E-002 -1.5093497E-003  
5.0635944E-002 2.8355515E-002 -7.5616279E-004  
5.2599616E-002 2.6794396E-002 2.2815072E-004  
5.4318030E-002 2.5109307E-002 1.3025973E-003  
5.5805453E-002 2.3330705E-002 2.4736262E-003  
5.7045199E-002 2.1447211E-002 3.7259761E-003  
5.8018612E-002 1.9477471E-002 5.0848119E-003  
5.8793731E-002 1.7395178E-002 6.5264566E-003  
5.9373373E-002 1.5177305E-002 8.0483614E-003  
5.9667721E-002 1.2875043E-002 9.6845305E-003  
5.9596918E-002 1.0441223E-002 1.1370401E-002  
5.8911437E-002 7.2643065E-003 1.3720746E-002  
5.7787658E-002 4.3220764E-003 1.5917967E-002  
5.6153170E-002 1.6477450E-003 1.7925604E-002  
5.4081884E-002 -7.7686089E-004 1.9778198E-002  
5.1555932E-002 -2.9754703E-003 2.1462653E-002  
4.8489890E-002 -4.8693647E-003 2.2903723E-002  
4.4925880E-002 -6.4890093E-003 2.4113485E-002  
4.1041543E-002 -7.9449613E-003 2.5405348E-002  
3.6594325E-002 -9.1103374E-003 2.6376031E-002  
2.4779385E-002 -7.6774117E-003 -1.7548036E-002  
2.5398601E-002 -7.0550645E-003 -1.8651195E-002  
2.6159505E-002 -6.1310566E-003 -1.9551326E-002  
2.6979573E-002 -4.9870639E-003 -2.0267586E-002  
2.7831094E-002 -3.6558015E-003 -2.0820781E-002  
2.8711355E-002 -2.1453690E-003 -2.1234238E-002  
2.9596618E-002 -4.4666496E-004 -2.1592325E-002  
3.0497908E-002 1.4522744E-003 -2.1888549E-002  
3.1415544E-002 3.5572768E-003 -2.2127234E-002  
3.2384155E-002 5.8488292E-003 -2.2155422E-002  
3.3229461E-002 7.4912311E-003 -2.2130070E-002  
3.4064030E-002 9.0622700E-003 -2.1888877E-002  
3.4844979E-002 1.0581069E-002 -2.1560971E-002  
3.5606539E-002 1.2032689E-002 -2.1078794E-002  
3.6324056E-002 1.3487541E-002 -2.0473043E-002  
3.7010263E-002 1.4813154E-002 -1.9721955E-002  
3.7669994E-002 1.6058280E-002 -1.8849586E-002  
3.8302692E-002 1.7368030E-002 -1.7828428E-002  
3.8869539E-002 1.8479121E-002 -1.6687860E-002  
3.9421225E-002 1.9846818E-002 -1.5288169E-002  
3.9829943E-002 2.0984725E-002 -1.3805730E-002  
4.0101389E-002 2.1930184E-002 -1.2234022E-002  
4.0224974E-002 2.2680110E-002 -1.0605474E-002  
4.0231371E-002 2.3232965E-002 -8.8997343E-003  
4.0100521E-002 2.3589038E-002 -7.1250224E-003

3.9851955E-002 2.3807030E-002 -5.2676504E-003  
3.9477516E-002 2.3811039E-002 -3.3128742E-003  
3.8959868E-002 2.3576783E-002 -1.2818769E-003  
3.7714838E-002 2.2741721E-002 2.0346168E-003  
3.6255645E-002 2.1484742E-002 4.7569438E-003  
3.4677586E-002 2.0043080E-002 6.9850885E-003  
3.2939117E-002 1.8372100E-002 8.6661834E-003  
3.1051157E-002 1.6595525E-002 9.9289351E-003  
2.8987778E-002 1.4598698E-002 1.0719098E-002  
2.6772627E-002 1.2377913E-002 1.1011181E-002  
2.4404371E-002 9.9365168E-003 1.0732204E-002  
2.1961766E-002 7.2793024E-003 9.7655853E-003  
2.1086612E-002 5.2310811E-003 8.9570027E-003  
2.0378775E-002 3.2952673E-003 7.9644227E-003  
2.0006865E-002 1.4453501E-003 6.7858921E-003  
1.9754439E-002 -2.7387242E-004 5.5738066E-003  
1.9506432E-002 -1.8400868E-003 4.2657055E-003  
1.9350804E-002 -3.2907558E-003 2.8362697E-003  
1.9247973E-002 -4.6944352E-003 1.2302977E-003  
1.9530484E-002 -6.0252777E-003 -4.4830437E-004  
2.0554787E-002 -6.9208873E-003 -1.9716761E-003  
2.1271092E-002 -6.5181639E-003 -3.3565927E-003  
2.2134831E-002 -6.0704558E-003 -4.7426302E-003  
2.2964669E-002 -5.6970278E-003 -6.2232181E-003  
2.3605766E-002 -5.5514112E-003 -7.8288064E-003  
2.4039962E-002 -5.6633944E-003 -9.5582893E-003  
2.4243903E-002 -6.0623931E-003 -1.1433180E-002  
2.4195452E-002 -6.7537554E-003 -1.3494119E-002  
2.4143126E-002 -7.4967810E-003 -1.5710491E-002  
2.3171219E-002 -1.3046298E-002 -2.0781587E-002  
2.4253466E-002 -1.1843884E-002 -2.1770399E-002  
2.5286527E-002 -1.0496226E-002 -2.2627419E-002  
2.6260441E-002 -9.0056843E-003 -2.3338537E-002  
2.7179044E-002 -7.4095011E-003 -2.3944837E-002  
2.8063316E-002 -5.7069878E-003 -2.4399208E-002  
2.8911318E-002 -3.8962713E-003 -2.4725623E-002  
2.9722098E-002 -1.9930376E-003 -2.4950106E-002  
3.0500587E-002 1.5733905E-005 -2.5162327E-002  
3.1276339E-002 2.1078534E-003 -2.5353605E-002  
3.2067086E-002 4.0849791E-003 -2.5418188E-002  
3.2891497E-002 5.9831493E-003 -2.5416085E-002  
3.3689314E-002 7.8170648E-003 -2.5252651E-002  
3.4512483E-002 9.5827332E-003 -2.4965196E-002  
3.5334567E-002 1.1284841E-002 -2.4576062E-002  
3.6146198E-002 1.2928310E-002 -2.4015316E-002  
3.6941479E-002 1.4504162E-002 -2.3288350E-002  
3.7789066E-002 1.6013069E-002 -2.2458865E-002  
3.8558546E-002 1.7456610E-002 -2.1457432E-002  
3.8884753E-002 1.9819457E-002 -1.9400419E-002  
4.0106671E-002 2.1835818E-002 -1.7664434E-002  
4.0924293E-002 2.3464245E-002 -1.5755318E-002  
4.1461438E-002 2.4778456E-002 -1.3658366E-002  
4.1860626E-002 2.5704154E-002 -1.1478334E-002  
4.1941165E-002 2.6432383E-002 -8.9890025E-003  
4.1828655E-002 2.6848285E-002 -6.3149706E-003  
4.1662706E-002 2.7083688E-002 -3.4411546E-003  
4.1008440E-002 2.6720199E-002 -4.9133271E-004  
4.0040199E-002 2.6008279E-002 3.2484902E-003  
3.8479107E-002 2.4630868E-002 6.3724641E-003  
3.6854595E-002 2.3080287E-002 9.0533287E-003

3.5011081E-002 2.1259618E-002 1.1235843E-002  
3.2979904E-002 1.9170578E-002 1.2976202E-002  
3.0704001E-002 1.6784639E-002 1.4227585E-002  
2.8187246E-002 1.4097599E-002 1.4982068E-002  
2.5423644E-002 1.1112461E-002 1.5223828E-002  
2.2450606E-002 7.8718217E-003 1.4897519E-002  
1.3119738E-002 8.1011753E-004 -5.9902751E-003  
1.2119881E-002 1.3327859E-003 -6.1510246E-003  
1.1101526E-002 1.7410568E-003 -6.3538222E-003  
1.0086893E-002 1.9958072E-003 -6.5182121E-003  
9.0972417E-003 2.1208677E-003 -6.6882065E-003  
8.1622276E-003 2.1774881E-003 -6.7869308E-003  
7.2017974E-003 2.2208606E-003 -7.0672344E-003  
6.2707961E-003 1.8361653E-003 -7.0189178E-003  
5.3340420E-003 1.4761929E-003 -7.0916276E-003  
4.3751473E-003 1.0006431E-003 -7.2239416E-003  
3.1888405E-003 4.9737364E-004 -7.2653919E-003  
2.1722350E-003 -9.0214737E-005 -7.3236642E-003  
1.3396076E-003 -7.5967493E-004 -7.4224875E-003  
6.7824556E-004 -1.5259792E-003 -7.5917624E-003  
1.8559405E-004 -2.3830097E-003 -7.7895516E-003  
-1.2641041E-004 -3.3707062E-003 -8.0226371E-003  
-2.3340308E-004 -4.4770578E-003 -8.2751204E-003  
-1.2205196E-004 -5.7094139E-003 -8.5267871E-003  
2.5350168E-004 -7.0066539E-003 -8.7412176E-003  
1.2659621E-003 -7.8160882E-003 -9.2468785E-003  
2.3152754E-003 -8.4027375E-003 -9.6615561E-003  
3.3606385E-003 -8.7519359E-003 -9.9701273E-003  
4.3850902E-003 -8.8916481E-003 -1.0149262E-002  
5.3677288E-003 -8.8546087E-003 -1.0295850E-002  
6.3441421E-003 -8.6126460E-003 -1.0335604E-002  
7.3150620E-003 -8.1996432E-003 -1.0308275E-002  
8.2833572E-003 -7.5433538E-003 -1.0212246E-002  
9.2261781E-003 -6.7127890E-003 -9.9616028E-003  
1.0111897E-002 -6.0319331E-003 -9.6555447E-003  
1.0886535E-002 -5.3100779E-003 -9.2915859E-003  
1.1529310E-002 -4.5543951E-003 -8.8766141E-003  
1.2087707E-002 -3.7642497E-003 -8.4683445E-003  
1.2543804E-002 -2.9375359E-003 -8.0633098E-003  
1.2880607E-002 -2.0594353E-003 -7.6049478E-003  
1.3095995E-002 -1.1331966E-003 -7.1003908E-003  
1.3197680E-002 -1.5255094E-004 -6.6050173E-003  
-2.7683078E-002 1.7182696E-002 1.9410468E-002  
-3.0228873E-002 1.9845864E-002 1.8117246E-002  
-3.2201997E-002 2.1779862E-002 1.7114244E-002  
-3.4783765E-002 2.3531171E-002 1.4591000E-002  
-3.5548425E-002 2.3485468E-002 1.3068783E-002  
-3.6182808E-002 2.2981341E-002 1.1257246E-002  
-3.6390737E-002 2.1612325E-002 8.9539941E-003  
-3.7549336E-002 -1.1488581E-002 1.7153890E-002  
-4.0125930E-002 -1.1959336E-002 1.6254021E-002  
-4.2132130E-002 -1.2304301E-002 1.5422944E-002  
-4.3532784E-002 -1.2378171E-002 1.4373832E-002  
-4.4781772E-002 -1.1973248E-002 1.1885515E-002  
-4.4882344E-002 -1.1595358E-002 1.0412001E-002  
-4.4586981E-002 -1.1021636E-002 8.6448682E-003  
-1.7373731E-002 -2.0399894E-002 5.5009745E-003  
-1.7830018E-002 -2.1651171E-002 3.9064901E-003  
-1.8247212E-002 -2.2632934E-002 2.5217158E-003  
-1.8782521E-002 -2.3164146E-002 1.2345732E-003

-2.0202560E-002 -2.2884781E-002 -1.1069141E-003  
-2.1082580E-002 -2.2165391E-002 -2.2241291E-003  
-2.2108583E-002 -2.1018110E-002 -3.3092306E-003  
-3.2445548E-002 1.1453935E-002 4.1860369E-003  
-3.3685633E-002 1.2804319E-002 3.3735492E-003  
-3.4668381E-002 1.3577179E-002 2.3677816E-003  
-3.5372082E-002 1.3838133E-002 1.3439191E-003  
-3.6172618E-002 1.3406023E-002 -7.1322251E-004  
-3.6352025E-002 1.2770025E-002 -1.8843472E-003  
-3.6375146E-002 1.1776921E-002 -3.2226084E-003  
-3.8493393E-002 -8.7977185E-003 6.2964295E-003  
-4.1105439E-002 -9.0602568E-003 5.2289212E-003  
-4.2390538E-002 -9.1552141E-003 3.9910594E-003  
-4.3691662E-002 -9.2253885E-003 2.0644556E-003  
-4.3863291E-002 -9.0609495E-003 1.0502744E-003  
-4.3849586E-002 -8.7819353E-003 -1.0548108E-004  
-4.3561127E-002 -8.3206225E-003 -1.4831023E-003  
-2.3248996E-002 -1.4801159E-002 -1.9340083E-003  
-2.3624777E-002 -1.6911009E-002 -3.9228625E-003  
-2.4992124E-002 -1.6726967E-002 -5.8707290E-003  
-2.5905792E-002 -1.7033890E-002 -7.8491392E-003  
-2.6437071E-002 -1.6737142E-002 -8.6559787E-003  
-2.7070305E-002 -1.6232639E-002 -9.4634560E-003  
-2.7851627E-002 -1.5416334E-002 -1.0288931E-002  
1.0897451E-002 1.5626175E-002 2.2511334E-005  
9.8775794E-003 1.5104033E-002 4.6265832E-004  
8.6697572E-003 1.3988047E-002 1.4033813E-003  
6.1507575E-003 1.4881583E-002 8.1772218E-004  
4.2794931E-003 1.4793861E-002 1.3282020E-003  
2.3614897E-003 1.4978350E-002 1.8389422E-003  
1.6327756E-004 1.5097386E-002 2.7081661E-003  
-2.2335062E-003 1.4979701E-002 3.9943866E-003  
-4.7839861E-003 1.4585216E-002 5.5505021E-003  
-7.4261218E-003 1.4327716E-002 7.2014024E-003  
-9.0534143E-003 1.4149340E-002 7.9604636E-003  
-1.0739908E-002 1.4000824E-002 8.7131240E-003  
-1.2459266E-002 1.3813399E-002 9.4472228E-003  
-1.4204749E-002 1.3470690E-002 1.0205448E-002  
-1.5990758E-002 1.3090784E-002 1.0931881E-002  
-1.7804152E-002 1.2550707E-002 1.1693964E-002  
-1.9650017E-002 1.1871844E-002 1.2473617E-002  
-2.1510184E-002 1.1035451E-002 1.3280888E-002  
-2.3297528E-002 9.9406388E-003 1.4131722E-002  
-2.5543477E-002 8.1534496E-003 1.4713921E-002  
-2.7446171E-002 6.3050138E-003 1.5145231E-002  
-2.9061930E-002 4.4077809E-003 1.5406458E-002  
-3.0323908E-002 2.4389309E-003 1.5536324E-002  
-3.1331976E-002 4.5044154E-004 1.5510369E-002  
-3.1965363E-002 -1.6137939E-003 1.5339714E-002  
-3.2320277E-002 -3.7461558E-003 1.5023915E-002  
-3.2322625E-002 -5.9330476E-003 1.4547505E-002  
-3.1903219E-002 -8.1532314E-003 1.3981946E-002  
-3.1131418E-002 -9.9466275E-003 1.3312022E-002  
-3.0205011E-002 -1.1483269E-002 1.2577118E-002  
-2.9028197E-002 -1.2680200E-002 1.1849007E-002  
-2.7716275E-002 -1.3613172E-002 1.1081082E-002  
-2.6266066E-002 -1.4250344E-002 1.0294633E-002  
-2.4704640E-002 -1.4656472E-002 9.4088781E-003  
-2.2978232E-002 -1.4783998E-002 8.5283388E-003  
-2.1098547E-002 -1.4661628E-002 7.5672489E-003

-1.9058148E-002 -1.4145168E-002 6.6458340E-003  
-1.6542792E-002 -1.1199275E-002 2.6718885E-003  
-1.4905681E-002 -6.8784677E-003 7.5732010E-004  
-1.4740106E-002 -3.0504783E-003 6.5789577E-004  
-1.5202450E-002 -2.1637094E-004 2.8525548E-004  
-1.6297424E-002 2.0087466E-003 1.2956150E-005  
-1.8064830E-002 3.8896395E-003 -2.0214454E-004  
-2.0823902E-002 5.6805211E-003 -4.1236396E-004  
-2.4839368E-002 7.0193968E-003 3.4388854E-004  
-2.8670106E-002 6.4680847E-003 2.8753324E-003  
-3.3012124E-002 3.6941834E-003 2.2088704E-003  
-3.4852613E-002 -2.3748365E-004 2.4261538E-003  
-3.4962579E-002 -2.9356743E-003 2.7865500E-003  
-3.4461217E-002 -4.7447869E-003 2.4452504E-003  
-3.3814600E-002 -6.1458940E-003 1.8001790E-003  
-3.2893666E-002 -7.3773904E-003 7.2788689E-004  
-3.1409094E-002 -8.6434772E-003 -1.1650760E-003  
-2.8275812E-002 -8.9278350E-003 -3.4019314E-003  
-2.4232950E-002 -7.1771788E-003 -3.6125687E-003  
-2.6516168E-002 -4.0453976E-003 -7.5475450E-003  
-2.8074945E-002 3.6931206E-004 -7.7105844E-003  
-2.8905355E-002 2.4968211E-003 -6.0024735E-003  
-2.9438231E-002 2.4044452E-003 -4.8319074E-003  
-3.0233418E-002 2.1574059E-003 -5.6356765E-003  
-3.1111665E-002 8.7708583E-004 -7.2284881E-003  
-3.0512562E-002 -2.8898936E-003 -8.9557046E-003  
-3.4673559E-002 -2.6148947E-003 -1.4382432E-002  
-2.9695803E-003 2.3564773E-002 1.1663972E-002  
-5.1139059E-003 2.3194274E-002 1.1738421E-002  
-7.3409119E-003 2.2677515E-002 1.2159865E-002  
-9.5818026E-003 2.1964691E-002 1.2843219E-002  
-1.1877189E-002 2.1045531E-002 1.3612530E-002  
-1.4256434E-002 1.9931550E-002 1.4496710E-002  
-1.6788939E-002 1.8635855E-002 1.5465111E-002  
-1.9454498E-002 1.7162709E-002 1.6540572E-002  
-2.2278192E-002 1.5507373E-002 1.7652218E-002  
-2.5223677E-002 1.3689861E-002 1.8826376E-002  
-2.7642963E-002 1.1287954E-002 1.9507047E-002  
-2.9728086E-002 8.8094876E-003 1.9954433E-002  
-3.1490270E-002 6.2787203E-003 2.0150844E-002  
-3.2886970E-002 3.6566571E-003 2.0166358E-002  
-3.3979039E-002 9.9103309E-004 1.9896992E-002  
-3.4715231E-002 -1.7580204E-003 1.9419320E-002  
-3.5084828E-002 -4.5993846E-003 1.8750561E-002  
-3.5087655E-002 -7.5270620E-003 1.7906336E-002  
-3.4676762E-002 -1.0557823E-002 1.7009088E-002  
-3.3301050E-002 -1.2945860E-002 1.5904941E-002  
-3.1757993E-002 -1.4976096E-002 1.4886544E-002  
-3.0061314E-002 -1.6634338E-002 1.3896248E-002  
-2.8238399E-002 -1.7922070E-002 1.2866163E-002  
-2.6282311E-002 -1.8827171E-002 1.1796921E-002  
-2.4189366E-002 -1.9352798E-002 1.0701525E-002  
-2.1947454E-002 -1.9512337E-002 9.5770121E-003  
-1.9611974E-002 -1.9251560E-002 8.3478301E-003  
-1.7231833E-002 -1.8566527E-002 6.9814849E-003  
-1.4044597E-002 -1.5927367E-002 5.1853771E-003  
-1.1795052E-002 -1.3102319E-002 3.5047798E-003  
-1.0376122E-002 -1.0186821E-002 2.0790633E-003  
-9.7775623E-003 -7.2010712E-003 9.1387892E-004  
-9.9026516E-003 -4.1159703E-003 8.9719694E-005

-1.0806100E-002 -9.1189075E-004 -4.2665543E-004  
-1.2495344E-002 2.4032571E-003 -6.6430609E-004  
-1.4981961E-002 5.8294898E-003 -6.1164600E-004  
-1.8213348E-002 9.3812432E-003 -2.1260533E-004  
-2.1636334E-002 1.0188062E-002 1.1187999E-003  
-2.4754401E-002 1.0560245E-002 2.2937121E-003  
-2.7545829E-002 1.0518769E-002 3.3067828E-003  
-3.0005847E-002 1.0057987E-002 4.1698523E-003  
-3.2129662E-002 9.1953461E-003 4.8954293E-003  
-3.3940346E-002 7.9086154E-003 5.4559424E-003  
-3.5421557E-002 6.2138831E-003 5.9227682E-003  
-3.6577273E-002 4.1156760E-003 6.2814031E-003  
-3.7396142E-002 1.5927030E-003 6.3910090E-003  
-3.7502022E-002 -5.2727648E-004 6.2179829E-003  
-3.7451651E-002 -2.5220212E-003 5.8772827E-003  
-3.7146720E-002 -4.2960821E-003 5.4607593E-003  
-3.6657344E-002 -5.9171099E-003 5.0463630E-003  
-3.6025612E-002 -7.3457187E-003 4.5239285E-003  
-3.5155797E-002 -8.6681012E-003 3.9605618E-003  
-3.4062321E-002 -9.8271509E-003 3.4012092E-003  
-3.2892385E-002 -1.0851553E-002 2.6805509E-003  
-3.1482146E-002 -1.1662217E-002 1.9220631E-003  
-2.9885583E-002 -1.2198086E-002 8.4715287E-004  
-2.8419661E-002 -1.2395987E-002 -2.0503583E-004  
-2.6860530E-002 -1.2312804E-002 -9.9267875E-004  
-2.5675620E-002 -1.1930961E-002 -1.8658284E-003  
-2.4517248E-002 -1.1263734E-002 -2.6460330E-003  
-2.3453215E-002 -1.0273495E-002 -3.3561478E-003  
-2.2542541E-002 -8.9615925E-003 -4.0570148E-003  
-2.1801445E-002 -7.3101558E-003 -4.7420627E-003  
-2.1299990E-002 -5.3710568E-003 -5.4945592E-003  
-2.4394508E-002 -2.2107613E-003 -6.4404791E-003  
-2.6201352E-002 1.8742030E-004 -7.2474206E-003  
-2.6806652E-002 2.3735911E-003 -5.7126142E-003  
-2.7677772E-002 3.7713652E-003 -5.0079694E-003  
-2.8716510E-002 4.3834427E-003 -4.9536875E-003  
-3.0073885E-002 3.9961816E-003 -6.0522790E-003  
-2.9213957E-002 2.5852444E-003 -5.7441213E-003  
-3.3610975E-002 -1.2204560E-003 -1.4237527E-002  
1.6497179E-002 1.2720297E-002 -3.8178918E-003  
1.5205868E-002 1.1858583E-002 -5.6106831E-003  
1.3783446E-002 1.1106649E-002 -7.2219295E-003  
1.2299201E-002 1.0608928E-002 -8.7120682E-003  
1.0753687E-002 1.0366428E-002 -1.0082588E-002  
9.1925792E-003 1.0387279E-002 -1.1387332E-002  
7.5872413E-003 1.0662752E-002 -1.2615328E-002  
5.9319919E-003 1.1190372E-002 -1.3750334E-002  
4.1929829E-003 1.1967393E-002 -1.4749499E-002  
2.3680598E-003 1.2973096E-002 -1.5596634E-002  
6.8609384E-004 1.4362247E-002 -1.6059545E-002  
-9.1567338E-004 1.5791846E-002 -1.6317153E-002  
-2.4518869E-003 1.7257824E-002 -1.6336320E-002  
-3.9073673E-003 1.8782518E-002 -1.6141957E-002  
-5.3091131E-003 2.0337067E-002 -1.5705092E-002  
-6.6441645E-003 2.1944154E-002 -1.5032462E-002  
-7.9338216E-003 2.3572455E-002 -1.4095631E-002  
-9.1963312E-003 2.5194594E-002 -1.2883750E-002  
-1.0439215E-002 2.6776136E-002 -1.1375842E-002  
-1.1610137E-002 2.8200865E-002 -9.5239395E-003  
-1.2818592E-002 2.9429405E-002 -7.6842287E-003



-1.4121199E-002 3.0378336E-002 -5.7803139E-003  
-1.5487052E-002 3.1107334E-002 -3.8401170E-003  
-1.6925921E-002 3.1617961E-002 -1.8618931E-003  
-1.8456818E-002 3.1873867E-002 1.5588088E-004  
-2.0073670E-002 3.1884909E-002 2.2275941E-003  
-2.1781015E-002 3.1587523E-002 4.3251492E-003  
-2.3565879E-002 3.1012711E-002 6.4371238E-003  
-2.6094034E-002 2.9935388E-002 8.8747054E-003  
-2.8542285E-002 2.8508866E-002 1.1050280E-002  
-3.0897949E-002 2.6702448E-002 1.2934243E-002  
-3.3192805E-002 2.4581553E-002 1.4580264E-002  
-3.5410538E-002 2.2093561E-002 1.5980707E-002  
-3.7589840E-002 1.9258545E-002 1.7171600E-002  
-3.9676005E-002 1.6004400E-002 1.8086617E-002  
-4.1618582E-002 1.2310874E-002 1.8669606E-002  
-4.3328903E-002 8.2096213E-003 1.8827846E-002  
-4.5011462E-002 2.8823254E-003 1.8216821E-002  
-4.5704011E-002 -2.1238431E-003 1.7185022E-002  
-4.5507801E-002 -6.6084260E-003 1.5891383E-002  
-4.4663534E-002 -1.0553182E-002 1.4510295E-002  
-4.3234644E-002 -1.3999104E-002 1.3069988E-002  
-4.1289663E-002 -1.7047519E-002 1.1591965E-002  
-3.8746315E-002 -1.9695566E-002 1.0027495E-002  
-3.5551703E-002 -2.1923377E-002 8.3525402E-003  
-3.1647066E-002 -2.3555942E-002 6.5265398E-003  
-2.8526011E-002 -2.4296064E-002 5.1501101E-003  
-2.5564085E-002 -2.4499285E-002 3.7832233E-003  
-2.2811912E-002 -2.4312343E-002 2.4772429E-003  
-2.0275550E-002 -2.3715498E-002 1.2273748E-003  
-1.7959320E-002 -2.2735007E-002 3.2361694E-005  
-1.5831181E-002 -2.1418167E-002 -1.1175030E-003  
-1.3891632E-002 -1.9740708E-002 -2.2228401E-003  
-1.2118726E-002 -1.7708246E-002 -3.2866401E-003  
-1.0612505E-002 -1.5234647E-002 -4.2747259E-003  
-9.5462352E-003 -1.2611400E-002 -5.2856372E-003  
-8.8886211E-003 -9.9685400E-003 -6.1213738E-003  
-8.6102637E-003 -7.3433484E-003 -6.7858978E-003  
-8.6287487E-003 -4.7544825E-003 -7.3145718E-003  
-8.9510316E-003 -2.1883533E-003 -7.7116608E-003  
-9.5944823E-003 3.7765470E-004 -7.9586491E-003  
-1.0565417E-002 2.9448181E-003 -8.0425158E-003  
-1.1914989E-002 5.4895941E-003 -7.9494998E-003  
-1.3690331E-002 7.9300543E-003 -7.6657142E-003  
-1.5757715E-002 1.0403223E-002 -7.0953017E-003  
-1.7964915E-002 1.2394182E-002 -6.4024184E-003  
-2.0271971E-002 1.3899799E-002 -5.6122211E-003  
-2.2635830E-002 1.4987569E-002 -4.7427253E-003  
-2.5068701E-002 1.5651904E-002 -3.7975354E-003  
-2.7587000E-002 1.5921353E-002 -2.7668449E-003  
-3.0207153E-002 1.5743760E-002 -1.6510249E-003  
-3.2910382E-002 1.5080990E-002 -4.4001830E-004  
-3.5635898E-002 1.3835173E-002 8.4234836E-004  
-3.8320030E-002 1.1982356E-002 1.7852835E-003  
-4.0489091E-002 9.8247182E-003 2.5162784E-003  
-4.2182148E-002 7.5011964E-003 3.0549639E-003  
-4.3456222E-002 5.0602155E-003 3.4144452E-003  
-4.4321904E-002 2.4914002E-003 3.6059962E-003  
-4.4819106E-002 -2.1778422E-004 3.6380358E-003  
-4.4931506E-002 -3.1021523E-003 3.4975075E-003  
-4.4540843E-002 -6.1582982E-003 3.1524243E-003

-4.3516925E-002 -9.2682473E-003 2.5506952E-003  
-4.2281588E-002 -1.1686382E-002 1.6001432E-003  
-4.0776099E-002 -1.3669874E-002 5.7198377E-004  
-3.9075260E-002 -1.5239580E-002 -4.8217438E-004  
-3.7232142E-002 -1.6450506E-002 -1.5641022E-003  
-3.5248237E-002 -1.7307595E-002 -2.6712031E-003  
-3.3100931E-002 -1.7826683E-002 -3.8090571E-003  
-3.0787661E-002 -1.8023961E-002 -4.9885802E-003  
-2.8288454E-002 -1.7839198E-002 -6.2054719E-003  
-2.5662277E-002 -1.7101032E-002 -7.4218834E-003  
-2.1060862E-002 -1.3137510E-002 -1.0915949E-002  
-1.8699265E-002 -7.9551609E-003 -1.2986181E-002  
-1.8266734E-002 -3.6780850E-003 -1.3814697E-002  
-1.8850034E-002 -4.1995579E-004 -1.4221684E-002  
-2.0248288E-002 2.3352448E-003 -1.4535873E-002  
-2.2788500E-002 4.9754796E-003 -1.4719305E-002  
-2.7246201E-002 7.4577431E-003 -1.4206059E-002  
-3.3884363E-002 8.7900025E-003 -1.1978160E-002  
-3.9890484E-002 7.2223796E-003 -8.0649005E-003  
-4.1864606E-002 6.7358992E-004 -1.0233387E-002  
-3.9987067E-002 -8.1355875E-003 -1.1874717E-002  
-3.7406867E-002 -1.2433369E-002 -1.1656010E-002  
-3.5920025E-002 -1.3636045E-002 -1.1578390E-002  
-3.5252487E-002 -1.3889042E-002 -1.2110917E-002  
-3.5107595E-002 -1.3444316E-002 -1.3163055E-002  
-3.5303228E-002 -1.1728011E-002 -1.4701623E-002  
-3.5182693E-002 -7.3964797E-003 -1.6233535E-002  
6.2238999E-003 -1.4364031E-002 -6.7930923E-003  
4.0093189E-003 -1.3388330E-002 -6.0537554E-003  
1.9039162E-003 -1.2254128E-002 -5.6629210E-003  
7.2803331E-005 -1.0889017E-002 -5.4801159E-003  
-1.3801859E-003 -9.2380503E-003 -5.4448264E-003  
-2.4003019E-003 -7.2714095E-003 -5.5186837E-003  
-2.9664429E-003 -4.9195868E-003 -5.6757461E-003  
-3.1027723E-003 -2.1133818E-003 -5.8870599E-003  
-3.1394357E-003 9.3063400E-004 -6.4273167E-003  
-3.3695721E-003 3.4034321E-003 -7.8757952E-003  
-4.1046396E-003 5.3466242E-003 -1.0543779E-002  
-5.1578297E-003 7.1720019E-003 -1.2953382E-002  
-6.3038324E-003 9.1604121E-003 -1.4617405E-002  
-7.5694692E-003 1.1224819E-002 -1.5596930E-002  
-9.0038961E-003 1.3264271E-002 -1.5907661E-002  
-1.0627886E-002 1.5318050E-002 -1.5726642E-002  
-1.2486497E-002 1.7396715E-002 -1.5063520E-002  
-1.4542011E-002 1.9498442E-002 -1.3796709E-002  
-1.6721384E-002 2.1641704E-002 -1.1877498E-002  
-1.8863826E-002 2.3098601E-002 -9.5889123E-003  
-2.0844056E-002 2.4129937E-002 -7.1759476E-003  
-2.2754961E-002 2.4734713E-002 -4.7752646E-003  
-2.4678938E-002 2.4909533E-002 -2.4685656E-003  
-2.6663940E-002 2.4645408E-002 -2.8897629E-004  
-2.8742094E-002 2.3949060E-002 1.7481543E-003  
-3.0912090E-002 2.2810865E-002 3.6462004E-003  
-3.3217680E-002 2.1245967E-002 5.3519724E-003  
-3.5615186E-002 1.9258657E-002 6.8964508E-003  
-3.8061694E-002 1.6308335E-002 8.1588840E-003  
-4.0171551E-002 1.3284816E-002 9.0445081E-003  
-4.1909553E-002 1.0190714E-002 9.5808506E-003  
-4.3264115E-002 7.0250187E-003 9.7932509E-003  
-4.4221693E-002 3.7821363E-003 9.6899743E-003

-4.4740536E-002 4.3562175E-004 9.3283893E-003  
-4.4818063E-002 -3.0125081E-003 8.7082076E-003  
-4.4410739E-002 -6.5566762E-003 7.8667241E-003  
-4.3468485E-002 -1.0168381E-002 6.8552466E-003  
-4.2082133E-002 -1.2942653E-002 5.7855938E-003  
-4.0390619E-002 -1.5287184E-002 4.7589773E-003  
-3.8436742E-002 -1.7163337E-002 3.7441067E-003  
-3.6311802E-002 -1.8600992E-002 2.6521478E-003  
-3.4011645E-002 -1.9600389E-002 1.4995838E-003  
-3.1544279E-002 -2.0180821E-002 2.5183182E-004  
-2.8911357E-002 -2.0354673E-002 -1.0919250E-003  
-2.6101308E-002 -2.0113480E-002 -2.5395261E-003  
-2.3105893E-002 -1.9450145E-002 -4.0661773E-003  
-2.0564884E-002 -1.7851943E-002 -5.6577760E-003  
-1.8440062E-002 -1.5977400E-002 -6.9898406E-003  
-1.6780226E-002 -1.3853209E-002 -8.0871293E-003  
-1.5573249E-002 -1.1522276E-002 -8.9966722E-003  
-1.4859005E-002 -8.9919877E-003 -9.7632685E-003  
-1.4584117E-002 -6.2691112E-003 -1.0457167E-002  
-1.4777938E-002 -3.3228316E-003 -1.1001562E-002  
-1.5429889E-002 -1.5036909E-004 -1.1349589E-002  
-1.6548295E-002 3.2328841E-003 -1.1357245E-002  
-1.8196782E-002 5.8597595E-003 -1.1069008E-002  
-1.9981486E-002 8.0169439E-003 -1.0564784E-002  
-2.1887300E-002 9.7044411E-003 -9.9313713E-003  
-2.3916003E-002 1.0928960E-002 -9.1950753E-003  
-2.6071265E-002 1.1694644E-002 -8.3875549E-003  
-2.8353142E-002 1.2000540E-002 -7.4930834E-003  
-3.0777615E-002 1.1867852E-002 -6.5588028E-003  
-3.3354059E-002 1.1289277E-002 -5.5751379E-003  
-3.6047675E-002 1.0251747E-002 -4.4711204E-003  
-3.8043223E-002 9.0330178E-003 -3.6976629E-003  
-3.9706516E-002 7.5960920E-003 -3.0575587E-003  
-4.1087150E-002 5.9928632E-003 -2.6004197E-003  
-4.2139353E-002 4.1843473E-003 -2.2765922E-003  
-4.2905979E-002 2.2033481E-003 -2.1287840E-003  
-4.3398219E-002 3.6569616E-005 -2.1546165E-003  
-4.3619987E-002 -2.3229635E-003 -2.3648801E-003  
-4.3432513E-002 -4.8929724E-003 -2.6603310E-003  
-4.2849202E-002 -7.6238170E-003 -3.0403784E-003  
-4.1803077E-002 -9.7370599E-003 -3.6495055E-003  
-4.0565851E-002 -1.1494134E-002 -4.2691953E-003  
-3.9167866E-002 -1.2877617E-002 -4.9344568E-003  
-3.7691343E-002 -1.3932639E-002 -5.7139384E-003  
-3.6101591E-002 -1.4642594E-002 -6.5766635E-003  
-3.4418429E-002 -1.5025869E-002 -7.5456448E-003  
-3.2653568E-002 -1.5110841E-002 -8.6483674E-003  
-3.0776251E-002 -1.4853366E-002 -9.8518576E-003  
-2.8775170E-002 -1.4223368E-002 -1.1100344E-002  
-2.5665595E-002 -1.0979905E-002 -1.3870010E-002  
-2.3455933E-002 -7.4521609E-003 -1.5344635E-002  
-2.2483303E-002 -4.2938780E-003 -1.5722384E-002  
-2.2567282E-002 -1.7187432E-003 -1.5921533E-002  
-2.3635998E-002 4.1616089E-004 -1.6007002E-002  
-2.5726889E-002 2.2931543E-003 -1.6392483E-002  
-2.9110393E-002 4.1669386E-003 -1.6705085E-002  
-3.3630366E-002 5.2653835E-003 -1.4653404E-002  
-3.8339682E-002 5.0911570E-003 -1.1923620E-002  
-3.8957610E-002 3.1484777E-004 -1.4082690E-002  
-3.8731787E-002 -4.6437795E-003 -1.5454345E-002

-3.7450260E-002 -8.0753688E-003 -1.5287173E-002  
-3.6601032E-002 -9.8233718E-003 -1.5087355E-002  
-3.6025854E-002 -1.0411501E-002 -1.5161992E-002  
-3.5684078E-002 -9.9367095E-003 -1.5492116E-002  
-3.5396894E-002 -8.4029778E-003 -1.5968392E-002  
-3.5254572E-002 -5.6210249E-003 -1.6910229E-002  
8.9661641E-003 -2.9817631E-003 1.8236741E-002  
1.2616769E-002 -4.8225367E-003 2.0689376E-002  
1.6564926E-002 -6.3726392E-003 2.2489770E-002  
2.0438761E-002 -7.6988645E-003 2.3850965E-002  
2.4134897E-002 -8.8139975E-003 2.5284245E-002  
2.7794540E-002 -9.7525121E-003 2.6233116E-002  
3.1361324E-002 -1.0431585E-002 2.7037102E-002  
3.4902899E-002 -1.1038246E-002 2.7489835E-002  
3.8384402E-002 -1.1347387E-002 2.7636914E-002  
4.1751768E-002 -1.1500167E-002 2.7458581E-002

3.3908160E-002 -5.9957928E-003 2.0828599E-002  
2.7222164E-002 -2.7914803E-002 -9.6508970E-003  
2.8185383E-002 -2.8645685E-002 -1.1135872E-002  
2.9396528E-002 -2.9632355E-002 -1.2063688E-002  
3.0725324E-002 -3.0556028E-002 -1.2646026E-002  
3.2224115E-002 -3.1398309E-002 -1.2776842E-002  
3.3873646E-002 -3.2154864E-002 -1.2577045E-002  
3.5699893E-002 -3.2823442E-002 -1.2007690E-002  
3.7699262E-002 -3.3447106E-002 -1.1178800E-002  
3.9880636E-002 -3.3999615E-002 -1.0037230E-002  
4.2152826E-002 -3.4465249E-002 -8.3908125E-003  
4.4099850E-002 -3.4853528E-002 -6.7883607E-003  
4.5839297E-002 -3.4809105E-002 -5.0255993E-003  
4.7225953E-002 -3.4601424E-002 -3.0578666E-003  
4.8299861E-002 -3.4138894E-002 -7.8361250E-004  
4.8947316E-002 -3.3515990E-002 1.2389781E-003  
4.9286847E-002 -3.2617631E-002 3.6428528E-003  
4.9473809E-002 -3.1402884E-002 6.5186396E-003  
4.9297058E-002 -2.9985150E-002 9.3778522E-003  
4.8835150E-002 -2.8326955E-002 1.2416782E-002  
4.8040474E-002 -2.6013705E-002 1.5540355E-002  
4.6955798E-002 -2.3666353E-002 1.8095970E-002  
4.5386374E-002 -2.1328623E-002 2.0027766E-002  
4.3182402E-002 -1.9163462E-002 2.1237414E-002  
4.0462665E-002 -1.7194904E-002 2.1729533E-002  
3.7583145E-002 -1.4908913E-002 2.1764745E-002  
3.4288029E-002 -1.2472525E-002 2.1244610E-002  
3.0406594E-002 -1.0225060E-002 2.0014608E-002  
2.6049501E-002 -8.3654689E-003 1.7920698E-002  
2.4066856E-002 -7.4465417E-003 1.6366235E-002  
2.2392003E-002 -6.7032873E-003 1.4970398E-002  
2.1041801E-002 -6.4308849E-003 1.3526207E-002  
2.0077558E-002 -6.7622937E-003 1.2012079E-002  
1.9449030E-002 -7.5805492E-003 1.0449687E-002  
1.9206602E-002 -8.9555063E-003 8.8415111E-003  
1.9235944E-002 -1.0739650E-002 7.1312244E-003  
1.9804293E-002 -1.3145589E-002 5.4528402E-003  
2.0830237E-002 -1.6048152E-002 3.8731307E-003  
2.2522451E-002 -1.8503637E-002 3.8198668E-003  
2.4108548E-002 -2.0761633E-002 3.6357062E-003  
2.5136358E-002 -2.2595725E-002 2.6961029E-003  
2.5972825E-002 -2.4138729E-002 1.4454413E-003  
2.6648185E-002 -2.5432731E-002 -9.7690867E-005

2.7247196E-002 -2.6591098E-002 -1.8448486E-003  
2.7600336E-002 -2.7411162E-002 -4.0216739E-003  
2.7413818E-002 -2.7518130E-002 -6.8541735E-003  
1.9200159E-002 -2.6827787E-002 -1.4327413E-002  
2.0688584E-002 -2.7998548E-002 -1.5804402E-002  
2.2434319E-002 -2.9123745E-002 -1.6833293E-002  
2.4377731E-002 -3.0095542E-002 -1.7437489E-002  
2.6465990E-002 -3.1076825E-002 -1.7771278E-002  
2.8648170E-002 -3.1918712E-002 -1.7694307E-002  
3.0967878E-002 -3.2793442E-002 -1.7351842E-002  
3.3425172E-002 -3.3585301E-002 -1.6666952E-002  
3.6050470E-002 -3.4333464E-002 -1.5618832E-002  
3.8820545E-002 -3.5062637E-002 -1.4254444E-002  
4.0393451E-002 -3.5397453E-002 -1.3336705E-002  
4.1941861E-002 -3.5747355E-002 -1.2372365E-002  
4.3419367E-002 -3.5994897E-002 -1.1230964E-002  
4.4887284E-002 -3.6226846E-002 -9.9992661E-003  
4.6294243E-002 -3.6349287E-002 -8.5712737E-003  
4.7671024E-002 -3.6414419E-002 -7.0065518E-003  
4.8956681E-002 -3.6367088E-002 -5.2349543E-003  
5.0119368E-002 -3.6175999E-002 -3.2591072E-003  
5.1094274E-002 -3.5734290E-002 -1.1025151E-003  
5.1709313E-002 -3.5234751E-002 1.1445840E-003  
5.2070291E-002 -3.4516851E-002 3.3367377E-003  
5.2252662E-002 -3.3695182E-002 5.4400769E-003  
5.2396931E-002 -3.2834830E-002 7.4844551E-003  
5.2277587E-002 -3.1818181E-002 9.4141607E-003  
5.2136825E-002 -3.0790459E-002 1.1310380E-002  
5.1850747E-002 -2.9660399E-002 1.3133804E-002  
5.1449643E-002 -2.8440288E-002 1.4880337E-002  
5.0869884E-002 -2.7086981E-002 1.6523988E-002  
5.0256144E-002 -2.5079508E-002 1.8588015E-002  
4.9250138E-002 -2.3034285E-002 2.0346797E-002  
4.7862547E-002 -2.0923016E-002 2.2063766E-002  
4.5962237E-002 -1.8690216E-002 2.3545939E-002  
4.3462100E-002 -1.6359248E-002 2.4649800E-002  
4.0337511E-002 -1.3902051E-002 2.5151205E-002  
3.6667464E-002 -1.1311462E-002 2.4926856E-002  
3.2502856E-002 -8.6268987E-003 2.4904438E-002  
2.8052848E-002 -5.8949943E-003 2.5805935E-002  
2.0912177E-002 2.4849822E-002 4.2258178E-003  
2.2665428E-002 2.5744704E-002 2.7163577E-003  
2.4596363E-002 2.6630526E-002 1.5947705E-003  
2.6542664E-002 2.7373701E-002 8.0210937E-004  
2.8541013E-002 2.7908954E-002 3.3352478E-004  
3.0474708E-002 2.8272062E-002 1.7703930E-005  
3.2413183E-002 2.8492967E-002 -1.3667262E-004  
3.4398239E-002 2.8644458E-002 -2.5461851E-004  
3.6430953E-002 2.8632705E-002 -1.6808302E-004  
3.8461711E-002 2.8470707E-002 1.1526929E-004  
4.0582381E-002 2.7306378E-002 8.6586375E-004  
4.3061606E-002 2.7119610E-002 8.2993764E-004  
4.5017541E-002 2.6307326E-002 1.3086191E-003  
4.6668300E-002 2.5366741E-002 2.0016317E-003  
4.8126945E-002 2.4267178E-002 2.7454745E-003  
4.9401065E-002 2.3069351E-002 3.5493213E-003  
5.0395823E-002 2.1758962E-002 4.5059892E-003  
5.1174700E-002 2.0267210E-002 5.5562680E-003  
5.1720297E-002 1.8707050E-002 6.7151830E-003  
5.1808534E-002 1.6116839E-002 8.4649199E-003

5.1457739E-002 1.3635935E-002 1.0121604E-002  
5.0504364E-002 1.1460471E-002 1.1792278E-002  
4.9078904E-002 9.4569847E-003 1.3386283E-002  
4.7188384E-002 7.5433670E-003 1.4893129E-002  
4.4808645E-002 5.6921762E-003 1.6328752E-002  
4.1859947E-002 4.1676488E-003 1.7742951E-002  
3.8422867E-002 2.8843317E-003 1.9105236E-002  
3.4466810E-002 1.7167356E-003 2.0397896E-002  
3.1040088E-002 5.9450922E-004 1.9915926E-002  
2.7891778E-002 2.9244901E-004 1.9391078E-002  
2.5181342E-002 6.2423467E-004 1.8862983E-002  
2.2842509E-002 1.2632322E-003 1.8332913E-002  
2.0867873E-002 2.2336761E-003 1.7768402E-002  
1.9114166E-002 3.3063967E-003 1.7067150E-002  
1.7409727E-002 4.5519105E-003 1.6114492E-002  
1.6286611E-002 6.6018381E-003 1.5184380E-002  
1.6357251E-002 9.1450849E-003 1.5047083E-002  
1.7788563E-002 1.1317363E-002 1.5588403E-002  
1.8952993E-002 1.3356493E-002 1.5779807E-002  
1.9815670E-002 1.5330237E-002 1.5429774E-002  
2.0438976E-002 1.7153942E-002 1.4602619E-002  
2.1010440E-002 1.8918820E-002 1.3462848E-002  
2.1577202E-002 2.0677127E-002 1.2029705E-002  
2.1585849E-002 2.2227072E-002 9.8359171E-003  
2.0989824E-002 2.3411350E-002 6.8725678E-003  
1.2511180E-002 2.7601950E-002 2.3105157E-003  
1.4522928E-002 2.8489744E-002 1.2694426E-003  
1.6673721E-002 2.9198688E-002 3.8711048E-004  
1.8912748E-002 2.9716531E-002 -3.5521056E-004  
2.1112581E-002 3.0325584E-002 -1.0122203E-003  
2.3429139E-002 3.0757745E-002 -1.5281427E-003  
2.5745987E-002 3.1306035E-002 -1.9357657E-003  
2.8148800E-002 3.1727103E-002 -2.2386068E-003  
3.0625110E-002 3.2034625E-002 -2.4103000E-003  
3.3160017E-002 3.2189968E-002 -2.4407404E-003  
3.5622544E-002 3.2249787E-002 -2.4178731E-003  
3.8006517E-002 3.1944162E-002 -2.2651999E-003  
4.0202721E-002 3.1398465E-002 -1.8402626E-003  
4.2292600E-002 3.0766577E-002 -1.4392005E-003  
4.4312868E-002 3.0038578E-002 -1.0429932E-003  
4.6177258E-002 2.9144724E-002 -4.9615985E-004  
4.7894121E-002 2.8081030E-002 1.6231558E-004  
4.9577594E-002 2.6930412E-002 8.3852076E-004  
5.1103764E-002 2.5615998E-002 1.6256382E-003  
5.2594651E-002 2.4030446E-002 2.7897227E-003  
5.3866714E-002 2.2462881E-002 3.9166140E-003  
5.4804402E-002 2.0825173E-002 5.0546569E-003  
5.5430664E-002 1.9201425E-002 6.2223629E-003  
5.5691394E-002 1.7605185E-002 7.4038172E-003  
5.5722103E-002 1.5967718E-002 8.5498406E-003  
5.5737615E-002 1.4294471E-002 9.6943604E-003  
5.5268952E-002 1.2650205E-002 1.0862599E-002  
5.4528137E-002 1.1054839E-002 1.2058245E-002  
5.3053177E-002 8.6305690E-003 1.3830815E-002  
5.1411363E-002 6.2991033E-003 1.5621337E-002  
4.9226239E-002 4.1369459E-003 1.7302476E-002  
4.6605019E-002 2.1495504E-003 1.8868849E-002  
4.3655508E-002 2.7166991E-004 2.0410088E-002  
4.0326892E-002 -1.4500022E-003 2.1854304E-002  
3.6572995E-002 -2.9962550E-003 2.3069056E-002

3.2507752E-002 -4.5596173E-003 2.4399341E-002  
2.8052848E-002 -5.8949943E-003 2.5805935E-002  
2.7732465E-002 -9.4047404E-003 -1.9006366E-002  
2.8164660E-002 -8.9971079E-003 -2.0056152E-002  
2.8688864E-002 -8.3017178E-003 -2.1000118E-002  
2.9273734E-002 -7.2856729E-003 -2.1829055E-002  
2.9963737E-002 -5.9882173E-003 -2.2495607E-002  
3.0735829E-002 -4.3889535E-003 -2.2985499E-002  
3.1548159E-002 -2.5007589E-003 -2.3342676E-002  
3.2352455E-002 -3.0480783E-004 -2.3719774E-002  
3.3192323E-002 2.1920799E-003 -2.3983130E-002  
3.4128558E-002 4.9756146E-003 -2.4127075E-002  
3.5008707E-002 6.8740701E-003 -2.4155935E-002  
3.5879574E-002 8.6830050E-003 -2.3923155E-002  
3.6710956E-002 1.0349025E-002 -2.3487547E-002  
3.7525374E-002 1.1889029E-002 -2.2864958E-002  
3.8247530E-002 1.3575099E-002 -2.2207150E-002  
3.8970085E-002 1.4876567E-002 -2.1291101E-002  
3.9625315E-002 1.6058069E-002 -2.0281941E-002  
4.0279760E-002 1.7495263E-002 -1.9087999E-002  
4.0799961E-002 1.8464752E-002 -1.7867882E-002  
4.1340804E-002 2.0017482E-002 -1.6601948E-002  
4.1733167E-002 2.1278135E-002 -1.5305374E-002  
4.2058938E-002 2.2388295E-002 -1.3904208E-002  
4.2281270E-002 2.3329729E-002 -1.2480195E-002  
4.2403317E-002 2.4024285E-002 -1.0945518E-002  
4.2391433E-002 2.4467446E-002 -9.3328179E-003  
4.2299960E-002 2.4736065E-002 -7.6454889E-003  
4.2092918E-002 2.4756651E-002 -5.8574323E-003  
4.1766687E-002 2.4558256E-002 -3.9773883E-003  
4.0514287E-002 2.4019241E-002 -1.1482784E-003  
3.9045723E-002 2.3204418E-002 1.2792732E-003  
3.7421745E-002 2.2156144E-002 3.3833808E-003  
3.5585981E-002 2.0775262E-002 5.1450221E-003  
3.3535992E-002 1.9181456E-002 6.5782994E-003  
3.1212097E-002 1.7237704E-002 7.7175429E-003  
2.8672217E-002 1.5035998E-002 8.5703406E-003  
2.5933976E-002 1.2487964E-002 9.1577421E-003  
2.3220730E-002 9.5705135E-003 8.5968330E-003  
2.2540638E-002 7.8225470E-003 8.1583034E-003  
2.2029513E-002 6.1033419E-003 7.2643104E-003  
2.2075115E-002 4.2881271E-003 6.0984165E-003  
2.2281354E-002 2.4891446E-003 4.9634827E-003  
2.2095233E-002 7.8485145E-004 3.7526600E-003  
2.1873419E-002 -8.9252452E-004 2.3844149E-003  
2.1574841E-002 -2.6831340E-003 7.4395489E-004  
2.1941734E-002 -4.5173560E-003 -8.1798544E-004  
2.3324023E-002 -5.8514773E-003 -1.9699456E-003  
2.4188675E-002 -5.3520690E-003 -3.4170888E-003  
2.5082617E-002 -4.9571468E-003 -4.9103694E-003  
2.5929255E-002 -4.7333031E-003 -6.5349906E-003  
2.6558800E-002 -4.8731879E-003 -8.2955274E-003  
2.6987375E-002 -5.3086054E-003 -1.0173883E-002  
2.7239132E-002 -6.0362597E-003 -1.2178797E-002  
2.7104385E-002 -7.1941009E-003 -1.4388194E-002  
2.6954668E-002 -8.5188416E-003 -1.6852391E-002  
2.5247234E-002 -1.6029014E-002 -2.2790561E-002  
2.6118787E-002 -1.5179027E-002 -2.3889140E-002  
2.6972428E-002 -1.3944541E-002 -2.4747681E-002  
2.7818608E-002 -1.2496188E-002 -2.5522624E-002

2.8630060E-002 -1.0797069E-002 -2.6138131E-002  
2.9463480E-002 -8.8753122E-003 -2.6566658E-002  
3.0346653E-002 -6.7823862E-003 -2.6943957E-002  
3.1237163E-002 -4.4742407E-003 -2.7172885E-002  
3.2139398E-002 -1.9418868E-003 -2.7441532E-002  
3.3046814E-002 8.1127050E-004 -2.7633629E-002  
3.3711019E-002 3.0094438E-003 -2.7710236E-002  
3.4458235E-002 5.1240464E-003 -2.7693576E-002  
3.5210909E-002 7.1453178E-003 -2.7526062E-002  
3.6002339E-002 9.1000998E-003 -2.7176035E-002  
3.6836393E-002 1.0957400E-002 -2.6748588E-002  
3.7720772E-002 1.2764980E-002 -2.6154670E-002  
3.8578370E-002 1.4476482E-002 -2.5327075E-002  
3.9602757E-002 1.6091526E-002 -2.4412267E-002  
4.0487847E-002 1.7640840E-002 -2.3309891E-002  
3.9425277E-002 2.0448498E-002 -2.0326960E-002  
4.1412598E-002 2.2832892E-002 -1.8731484E-002  
4.2634782E-002 2.4615351E-002 -1.6981159E-002  
4.3444192E-002 2.6087129E-002 -1.5062385E-002  
4.4284749E-002 2.6971618E-002 -1.3221209E-002  
4.4642998E-002 2.7831091E-002 -1.0830624E-002  
4.4654165E-002 2.8246282E-002 -8.2469499E-003  
4.4907359E-002 2.8615211E-002 -5.4296175E-003  
4.4216779E-002 2.7870184E-002 -2.7423717E-003  
4.3499441E-002 2.7876411E-002 6.5125763E-004  
4.1331673E-002 2.6518919E-002 3.3168705E-003  
3.9475591E-002 2.5195919E-002 5.8981204E-003  
3.7220234E-002 2.3431963E-002 7.9902958E-003  
3.4675052E-002 2.1276686E-002 9.7140731E-003  
3.1775729E-002 1.8733354E-002 1.0998187E-002  
2.8617735E-002 1.5783367E-002 1.1890925E-002  
2.5311997E-002 1.2502234E-002 1.3010134E-002  
2.1674079E-002 8.7491809E-003 1.3827315E-002  
1.6213399E-002 -1.1478814E-003 -3.9456877E-003  
1.5168414E-002 -9.0475700E-004 -3.8370130E-003  
1.4092515E-002 -6.1908457E-004 -4.0290163E-003  
1.3026757E-002 -4.9053119E-004 -4.1249206E-003  
1.2023930E-002 -4.7204418E-004 -4.2789482E-003  
1.1042569E-002 -5.3360881E-004 -4.4987161E-003  
1.0068541E-002 -8.3572377E-004 -4.5654927E-003  
9.0825389E-003 -1.0694432E-003 -4.7913940E-003  
8.0842385E-003 -1.3336545E-003 -5.0131230E-003  
7.1079132E-003 -1.7094776E-003 -5.1970012E-003  
5.6069696E-003 -2.3598270E-003 -5.3410407E-003  
4.3187075E-003 -3.0719442E-003 -5.5262747E-003  
3.2424778E-003 -3.8364248E-003 -5.7174187E-003  
2.4118613E-003 -4.6525731E-003 -5.9860206E-003  
1.7802252E-003 -5.4711152E-003 -6.3083111E-003  
1.4331527E-003 -6.4517604E-003 -6.5838646E-003  
1.2869079E-003 -7.4520087E-003 -6.8934348E-003  
1.2915457E-003 -8.5022059E-003 -7.3732412E-003  
1.5762340E-003 -9.6241056E-003 -7.9002361E-003  
2.7140438E-003 -1.0391689E-002 -8.4644828E-003  
3.9148477E-003 -1.0882257E-002 -8.9541839E-003  
5.0954361E-003 -1.1117120E-002 -9.3582947E-003  
6.2915393E-003 -1.1107565E-002 -9.4504197E-003  
7.4471134E-003 -1.0929827E-002 -9.5510500E-003  
8.6066405E-003 -1.0479016E-002 -9.4436669E-003  
9.7488835E-003 -9.8401843E-003 -9.1209366E-003  
1.0877118E-002 -8.9684806E-003 -8.7868031E-003



1.2037413E-002 -7.9432928E-003 -8.2986102E-003  
1.2895259E-002 -7.1859151E-003 -7.8203162E-003  
1.3721009E-002 -6.4315083E-003 -7.4830719E-003  
1.4377728E-002 -5.6867107E-003 -6.9990327E-003  
1.5006731E-002 -4.9256675E-003 -6.6286458E-003  
1.5469091E-002 -4.1842776E-003 -6.1589509E-003  
1.5786833E-002 -3.4348496E-003 -5.6048823E-003  
1.6040443E-002 -2.6791508E-003 -4.9997073E-003  
1.6260658E-002 -1.8849965E-003 -4.4861246E-003  
-2.8385102E-002 1.5378720E-002 2.1883617E-002  
-3.0611718E-002 1.8219642E-002 2.1333661E-002  
-3.2341026E-002 2.0400553E-002 2.0858383E-002  
-3.4664518E-002 2.2480019E-002 1.8765858E-002  
-3.5430595E-002 2.2701760E-002 1.7227147E-002  
-3.6169778E-002 2.2503943E-002 1.5196192E-002  
-3.6527267E-002 2.1394913E-002 1.2416657E-002  
-4.0769723E-002 -1.4492250E-002 1.6548567E-002  
-4.3187753E-002 -1.4705799E-002 1.5680826E-002  
-4.5088677E-002 -1.4775353E-002 1.4813960E-002  
-4.6520089E-002 -1.4664787E-002 1.3859447E-002  
-4.7677465E-002 -1.3737935E-002 1.1392740E-002  
-4.7687457E-002 -1.3032762E-002 9.9757038E-003  
-4.7318484E-002 -1.2115067E-002 8.3276504E-003  
-1.7393463E-002 -2.3045486E-002 5.5732680E-003  
-1.7838183E-002 -2.4065311E-002 3.9602906E-003  
-1.8232668E-002 -2.4924463E-002 2.5264744E-003  
-1.8763300E-002 -2.5326105E-002 1.1984128E-003  
-2.0188359E-002 -2.4780986E-002 -1.1087747E-003  
-2.1032719E-002 -2.4067670E-002 -2.2466708E-003  
-2.2012764E-002 -2.2930918E-002 -3.3355252E-003  
-3.4739832E-002 1.3397679E-002 6.4008726E-003  
-3.5703274E-002 1.4678308E-002 5.9704255E-003  
-3.6437065E-002 1.5537156E-002 5.2673070E-003  
-3.6978565E-002 1.6042489E-002 4.4001021E-003  
-3.7624546E-002 1.5927262E-002 2.1527123E-003  
-3.7761214E-002 1.5328529E-002 6.8811081E-004  
-3.7692152E-002 1.4248083E-002 -1.0155076E-003  
-4.0294771E-002 -1.1843703E-002 6.2245571E-003  
-4.3500573E-002 -1.1097368E-002 5.5801105E-003  
-4.4770858E-002 -1.0198332E-002 4.1956371E-003  
-4.6393831E-002 -9.8624221E-003 2.3418980E-003  
-4.6537524E-002 -9.5192968E-003 1.2525848E-003  
-4.6384175E-002 -9.1068151E-003 1.9540488E-005  
-4.5833891E-002 -8.5274967E-003 -1.4113197E-003  
-2.3348587E-002 -1.6197151E-002 -3.3723472E-003  
-2.4980215E-002 -1.5838971E-002 -5.0741182E-003  
-2.4618293E-002 -1.7158540E-002 -5.9885814E-003  
-2.5430421E-002 -1.7631582E-002 -7.9255169E-003  
-2.6087026E-002 -1.7270872E-002 -8.8317094E-003  
-2.6870710E-002 -1.6515119E-002 -9.7295172E-003  
-2.7800770E-002 -1.5372711E-002 -1.0616735E-002  
1.0169381E-002 1.5233835E-002 -6.1672996E-004  
8.6848318E-003 1.5171553E-002 -1.8906763E-003  
6.6661028E-003 1.7032479E-002 -3.2519320E-003  
6.4072393E-003 1.4603377E-002 -5.9147042E-004  
4.7977690E-003 1.4485410E-002 -9.6949001E-005  
3.1815397E-003 1.5003265E-002 2.0347167E-005  
8.8906348E-004 1.5260321E-002 1.0924388E-003  
-1.7703243E-003 1.5449068E-002 2.9363349E-003  
-4.7371429E-003 1.5541972E-002 5.0949713E-003

-7.8954163E-003 1.5948139E-002 7.3578185E-003  
-9.3043364E-003 1.6248349E-002 8.1508389E-003  
-1.0788039E-002 1.6343866E-002 9.0295408E-003  
-1.2494053E-002 1.6438924E-002 9.8903140E-003  
-1.4313401E-002 1.6180848E-002 1.0824034E-002  
-1.6301343E-002 1.5631704E-002 1.1800997E-002  
-1.8413394E-002 1.4844297E-002 1.2855112E-002  
-2.0703405E-002 1.3881661E-002 1.3973633E-002  
-2.3098308E-002 1.2548615E-002 1.5200486E-002  
-2.5579754E-002 1.0913509E-002 1.6462464E-002  
-2.7910400E-002 8.6076535E-003 1.6914135E-002  
-2.9928973E-002 6.3373085E-003 1.7185396E-002  
-3.1662144E-002 3.9882997E-003 1.7288985E-002  
-3.3060618E-002 1.5762500E-003 1.7245866E-002  
-3.4121928E-002 -9.3659700E-004 1.7014630E-002  
-3.4916173E-002 -3.3741375E-003 1.6617198E-002  
-3.5442624E-002 -5.8827515E-003 1.6098856E-002  
-3.5595087E-002 -8.4439053E-003 1.5371421E-002  
-3.5369788E-002 -1.1017696E-002 1.4473490E-002  
-3.4570803E-002 -1.3438147E-002 1.3708071E-002  
-3.3262858E-002 -1.5398919E-002 1.2890100E-002  
-3.1619675E-002 -1.6840422E-002 1.2153640E-002  
-2.9853395E-002 -1.7869730E-002 1.1382602E-002  
-2.8013690E-002 -1.8534757E-002 1.0625659E-002  
-2.6009402E-002 -1.8854124E-002 9.8178891E-003  
-2.3848838E-002 -1.8797291E-002 9.0245122E-003  
-2.1501078E-002 -1.8422059E-002 8.1697819E-003  
-1.9022922E-002 -1.7570608E-002 7.3344019E-003  
-1.4991310E-002 -1.3500600E-002 3.6349042E-003  
-1.2654169E-002 -8.4442885E-003 1.7568374E-003  
-1.1908597E-002 -3.9540826E-003 1.5094478E-003  
-1.2075755E-002 -4.3417126E-004 1.2198852E-003  
-1.3036169E-002 2.4086464E-003 7.8504371E-004  
-1.5021011E-002 4.8579909E-003 6.2294991E-004  
-1.8244136E-002 7.1251307E-003 9.4838177E-004  
-2.3132056E-002 9.3482675E-003 1.1667355E-003  
-2.8392367E-002 8.8974029E-003 3.9989859E-003  
-3.3853223E-002 5.8626600E-003 2.7268845E-003  
-3.6347677E-002 9.5181669E-004 2.6467751E-003  
-3.6867426E-002 -2.1285098E-003 3.8322933E-003  
-3.6574227E-002 -4.7179400E-003 3.7307072E-003  
-3.5948941E-002 -6.5929824E-003 3.1552914E-003  
-3.4434123E-002 -7.9505108E-003 2.3593110E-003  
-3.2107604E-002 -8.9866215E-003 7.4386504E-004  
-2.8735552E-002 -9.5194318E-003 -9.4846422E-004  
-2.3871430E-002 -8.6222889E-003 -1.9023154E-003  
-2.3711997E-002 -3.8650041E-003 -5.6691288E-003  
-2.3157421E-002 1.5790491E-003 -6.3491219E-003  
-2.3907817E-002 4.5351117E-003 -4.3029452E-003  
-2.5780277E-002 4.9000152E-003 -3.5798062E-003  
-2.7944232E-002 4.7861396E-003 -5.5299132E-003  
-3.0460164E-002 2.2461338E-003 -7.8046800E-003  
-3.5062367E-002 -4.7167363E-003 -1.0002001E-002  
-3.6234095E-002 -8.6474460E-003 -1.8280809E-002  
3.6465126E-004 1.8055079E-002 6.0320113E-003  
-2.4700293E-003 1.8697984E-002 6.7745927E-003  
-5.2153416E-003 1.9093177E-002 8.3130989E-003  
-7.8505469E-003 1.9087527E-002 1.0194262E-002  
-1.0531057E-002 1.8719989E-002 1.2190903E-002  
-1.3289915E-002 1.7983930E-002 1.4172798E-002

-1.6296700E-002 1.6955263E-002 1.5911880E-002  
-1.9474095E-002 1.5626770E-002 1.7609353E-002  
-2.2786072E-002 1.3983670E-002 1.9316337E-002  
-2.6278222E-002 1.2085062E-002 2.0901888E-002  
-2.8862992E-002 9.5434699E-003 2.1413476E-002  
-3.1115307E-002 6.9053840E-003 2.1719155E-002  
-3.3057447E-002 4.2053141E-003 2.1748452E-002  
-3.4620017E-002 1.3706563E-003 2.1597042E-002  
-3.5932054E-002 -1.4780523E-003 2.1105252E-002  
-3.6925679E-002 -4.4054332E-003 2.0328802E-002  
-3.7545695E-002 -7.4456240E-003 1.9373165E-002  
-3.7859515E-002 -1.0567008E-002 1.8147788E-002  
-3.7799908E-002 -1.3849160E-002 1.6906662E-002  
-3.6231725E-002 -1.6417497E-002 1.5488910E-002  
-3.4418383E-002 -1.8614562E-002 1.4400002E-002  
-3.2453346E-002 -2.0358867E-002 1.3332362E-002  
-3.0291162E-002 -2.1697764E-002 1.2370863E-002  
-2.7994074E-002 -2.2562373E-002 1.1334343E-002  
-2.5517892E-002 -2.2983932E-002 1.0352432E-002  
-2.2836140E-002 -2.2992715E-002 9.4082066E-003  
-2.0027137E-002 -2.2477776E-002 8.3885220E-003  
-1.7217367E-002 -2.1369950E-002 7.1591512E-003  
-1.3300629E-002 -1.8475073E-002 5.5318278E-003  
-1.0461510E-002 -1.5282568E-002 3.9840799E-003  
-8.7160541E-003 -1.1907888E-002 2.6366545E-003  
-7.9113194E-003 -8.3667984E-003 1.5997763E-003  
-7.9991325E-003 -4.6225113E-003 9.0976142E-004  
-9.0151280E-003 -6.7495170E-004 5.1599188E-004  
-1.1052613E-002 3.4347192E-003 3.3580922E-004  
-1.4070980E-002 7.7206689E-003 3.6031688E-004  
-1.7839529E-002 1.2337721E-002 9.5942516E-004  
-2.2029048E-002 1.3198634E-002 2.8769047E-003  
-2.5860847E-002 1.3462983E-002 4.4199075E-003  
-2.9304683E-002 1.3168505E-002 5.5515445E-003  
-3.2268201E-002 1.2373716E-002 6.4676398E-003  
-3.4785457E-002 1.1058451E-002 7.0866259E-003  
-3.6822269E-002 9.2511420E-003 7.5065255E-003  
-3.8401185E-002 6.9005465E-003 7.7174926E-003  
-3.9564012E-002 4.0191513E-003 7.8126567E-003  
-4.0304449E-002 6.0877830E-004 7.5992244E-003  
-4.0091838E-002 -1.8580553E-003 7.4411460E-003  
-3.9682454E-002 -4.1482882E-003 7.0270423E-003  
-3.9259690E-002 -6.1226992E-003 6.5017854E-003  
-3.8561220E-002 -7.9223962E-003 5.9020797E-003  
-3.7714297E-002 -9.4194304E-003 5.2293304E-003  
-3.6531986E-002 -1.0846375E-002 4.5256003E-003  
-3.5430987E-002 -1.2212877E-002 3.5566227E-003  
-3.3792279E-002 -1.3262037E-002 3.2877118E-003  
-3.1849411E-002 -1.3974611E-002 2.8681862E-003  
-3.0015075E-002 -1.4500410E-002 1.4011400E-003  
-2.8330299E-002 -1.4602601E-002 -7.0452407E-005  
-2.6144356E-002 -1.4406694E-002 -8.7367017E-004  
-2.5027502E-002 -1.3889653E-002 -1.9609727E-003  
-2.3594629E-002 -1.3114850E-002 -2.7464805E-003  
-2.2236393E-002 -1.1957649E-002 -3.3760243E-003  
-2.1023462E-002 -1.0423713E-002 -3.9555949E-003  
-2.0075987E-002 -8.4203236E-003 -4.4743321E-003  
-1.9403729E-002 -6.0768392E-003 -4.9734753E-003  
-2.2601653E-002 -1.1302241E-003 -5.2973612E-003  
-2.3165256E-002 2.3722748E-003 -4.3303560E-003

-2.3913376E-002 4.7143675E-003 -4.3105695E-003  
-2.5092278E-002 6.3132746E-003 -4.1041323E-003  
-2.6361715E-002 6.7852673E-003 -3.7731239E-003  
-2.8628622E-002 4.7438052E-003 -6.9229377E-003  
-2.7705922E-002 -4.1200455E-005 -7.0972043E-003  
-3.3807821E-002 -8.2063195E-003 -1.7522066E-002  
1.9438512E-002 9.8512573E-003 -5.4819919E-003  
1.7898190E-002 8.5485628E-003 -7.1035843E-003  
1.6301330E-002 7.5899615E-003 -8.6568790E-003  
1.4641842E-002 6.9379390E-003 -1.0157857E-002  
1.3110902E-002 6.5990787E-003 -1.1782429E-002  
1.1548094E-002 6.4656305E-003 -1.3336479E-002  
9.8979485E-003 6.5793168E-003 -1.4793247E-002  
8.2002911E-003 6.9587909E-003 -1.6182956E-002  
6.3421299E-003 7.5794713E-003 -1.7364236E-002  
4.4229684E-003 8.4584658E-003 -1.8432980E-002  
2.7419274E-003 9.6913709E-003 -1.9174787E-002  
1.2099552E-003 1.1113762E-002 -1.9659883E-002  
-1.9800730E-004 1.2746239E-002 -1.9816174E-002  
-1.4878263E-003 1.4590167E-002 -1.9634370E-002  
-2.6696336E-003 1.6651467E-002 -1.9140329E-002  
-3.7458486E-003 1.8914933E-002 -1.8275729E-002  
-4.7245800E-003 2.1400552E-002 -1.7011083E-002  
-5.6914137E-003 2.3957813E-002 -1.5283155E-002  
-6.6508064E-003 2.6536868E-002 -1.3048509E-002  
-7.0073041E-003 2.8575491E-002 -1.0380658E-002  
-7.5186596E-003 3.0358542E-002 -7.8362004E-003  
-8.3618810E-003 3.1675548E-002 -5.1852549E-003  
-9.4337389E-003 3.2707958E-002 -2.5140059E-003  
-1.0759929E-002 3.3431443E-002 1.9858944E-004  
-1.2382099E-002 3.3773839E-002 2.9636690E-003  
-1.4305677E-002 3.3701493E-002 5.7740198E-003  
-1.6541279E-002 3.3168263E-002 8.6033814E-003  
-1.9052585E-002 3.2157810E-002 1.1411712E-002  
-2.2826051E-002 3.0569345E-002 1.3896030E-002  
-2.6380901E-002 2.8599247E-002 1.6009376E-002  
-2.9712452E-002 2.6256273E-002 1.7662513E-002  
-3.2779458E-002 2.3609296E-002 1.8922690E-002  
-3.5559950E-002 2.0646938E-002 1.9769930E-002  
-3.8197571E-002 1.7564467E-002 2.0335819E-002  
-4.0639028E-002 1.4246728E-002 2.0569096E-002  
-4.2854264E-002 1.0669617E-002 2.0418008E-002  
-4.4887866E-002 6.8579079E-003 1.9949170E-002  
-4.7015406E-002 1.3657807E-003 1.8804732E-002  
-4.8069912E-002 -3.8124594E-003 1.7314424E-002  
-4.8226370E-002 -8.4965840E-003 1.5729117E-002  
-4.7537206E-002 -1.2614560E-002 1.4080277E-002  
-4.6259515E-002 -1.6244516E-002 1.2470969E-002  
-4.4430767E-002 -1.9486459E-002 1.0918364E-002  
-4.1948273E-002 -2.2342854E-002 9.3488675E-003  
-3.8732920E-002 -2.4772775E-002 7.7150093E-003  
-3.4657661E-002 -2.6449968E-002 6.0070741E-003  
-3.0786110E-002 -2.7162631E-002 4.7323417E-003  
-2.7082696E-002 -2.7241271E-002 3.4539117E-003  
-2.3648562E-002 -2.6872630E-002 2.2555905E-003  
-2.0518491E-002 -2.5968656E-002 1.1258217E-003  
-1.7702457E-002 -2.4656384E-002 6.1105048E-005  
-1.5125990E-002 -2.3048182E-002 -9.2204537E-004  
-1.2752571E-002 -2.1129595E-002 -1.8766330E-003  
-1.0598796E-002 -1.8817313E-002 -2.7660128E-003

-8.7598492E-003 -1.6027408E-002 -3.5749140E-003  
-7.4346730E-003 -1.3184319E-002 -4.5329977E-003  
-6.5744416E-003 -1.0307857E-002 -5.3284261E-003  
-6.1174912E-003 -7.4698950E-003 -5.9851786E-003  
-6.0265250E-003 -4.6905037E-003 -6.5009493E-003  
-6.3386672E-003 -1.9547864E-003 -6.8592428E-003  
-6.9814085E-003 7.2617092E-004 -7.0958306E-003  
-7.9234880E-003 3.3821584E-003 -7.2161602E-003  
-9.1901958E-003 6.0335739E-003 -7.2235563E-003  
-1.0881790E-002 8.6261287E-003 -7.0617980E-003  
-1.3256612E-002 1.2009601E-002 -6.1857122E-003  
-1.5850732E-002 1.4742307E-002 -5.1617916E-003  
-1.8627726E-002 1.6732095E-002 -4.0460391E-003  
-2.1468342E-002 1.8130861E-002 -2.8665113E-003  
-2.4426166E-002 1.8808879E-002 -1.6292717E-003  
-2.7446380E-002 1.9044612E-002 -3.3426434E-004  
-3.0586473E-002 1.8728378E-002 1.0065772E-003  
-3.3858935E-002 1.7814398E-002 2.4409667E-003  
-3.7191737E-002 1.6148863E-002 3.9048468E-003  
-4.0290211E-002 1.3798175E-002 4.4208244E-003  
-4.2832468E-002 1.1252553E-002 4.7541172E-003  
-4.4825035E-002 8.5604761E-003 4.9325266E-003  
-4.6279737E-002 5.7435133E-003 4.9529966E-003  
-4.7252913E-002 2.8317018E-003 4.8348481E-003  
-4.7745681E-002 -1.9793276E-004 4.5533902E-003  
-4.7877649E-002 -3.3624943E-003 4.1703620E-003  
-4.7392470E-002 -6.6789859E-003 3.6173900E-003  
-4.6200236E-002 -1.0011031E-002 2.8616825E-003  
-4.4769556E-002 -1.2656834E-002 1.4499362E-003  
-4.3054536E-002 -1.4817762E-002 7.3690764E-005  
-4.1063802E-002 -1.6456176E-002 -1.2206921E-003  
-3.8905545E-002 -1.7708978E-002 -2.4514474E-003  
-3.6530024E-002 -1.8498670E-002 -3.5793679E-003  
-3.3962451E-002 -1.8842103E-002 -4.6305567E-003  
-3.1236617E-002 -1.8888067E-002 -5.6439469E-003  
-2.8283139E-002 -1.8601290E-002 -6.6167141E-003  
-2.5154651E-002 -1.7700419E-002 -7.4665159E-003  
-1.9693580E-002 -1.2463874E-002 -1.1109286E-002  
-1.6826320E-002 -5.9262709E-003 -1.3093082E-002  
-1.6473003E-002 -6.2105886E-004 -1.3508961E-002  
-1.7332993E-002 3.2876137E-003 -1.3471070E-002  
-1.9087928E-002 6.4785286E-003 -1.3388712E-002  
-2.2117763E-002 9.3634435E-003 -1.3114695E-002  
-2.7232581E-002 1.1902531E-002 -1.2190839E-002  
-3.4876776E-002 1.2757414E-002 -9.6855865E-003  
-4.1852215E-002 1.0112188E-002 -6.0565010E-003  
-4.3978360E-002 4.5057207E-003 -9.6970859E-003  
-4.0034574E-002 -6.3935514E-003 -1.4382662E-002  
-3.6210367E-002 -1.2152595E-002 -1.4874761E-002  
-3.4277208E-002 -1.3272640E-002 -1.4865641E-002  
-3.3826228E-002 -1.3384042E-002 -1.5432532E-002  
-3.4392934E-002 -1.2718180E-002 -1.6150823E-002  
-3.5983751E-002 -1.1640846E-002 -1.6910282E-002  
-3.8390180E-002 -1.0138915E-002 -1.7952803E-002  
9.6353811E-003 -1.7000834E-002 -1.0548070E-002  
7.0420392E-003 -1.6217869E-002 -9.0452626E-003  
4.4329392E-003 -1.5295948E-002 -8.1206820E-003  
2.2266076E-003 -1.4089917E-002 -7.4223864E-003  
5.2550939E-004 -1.2569200E-002 -6.9369039E-003  
-5.8218341E-004 -1.0676674E-002 -6.5699420E-003

-1.0189169E-003 -8.2955606E-003 -6.2403131E-003  
-7.0916895E-004 -5.2441859E-003 -5.8555912E-003  
-7.2364096E-005 -1.6603339E-003 -5.7308056E-003  
2.6719721E-004 8.9002826E-004 -6.8719596E-003  
-9.2267758E-004 2.9343221E-003 -1.0766163E-002  
-2.2859622E-003 4.9637982E-003 -1.4257177E-002  
-3.5980137E-003 7.3665496E-003 -1.6579838E-002  
-4.8787791E-003 9.9401166E-003 -1.7761674E-002  
-6.2922472E-003 1.2511529E-002 -1.8171014E-002  
-7.8134462E-003 1.5107794E-002 -1.7794039E-002  
-9.5873733E-003 1.7746047E-002 -1.6783095E-002  
-1.1506224E-002 2.0515853E-002 -1.4937455E-002  
-1.3429259E-002 2.3402423E-002 -1.2137012E-002  
-1.5382343E-002 2.5491607E-002 -8.8833755E-003  
-1.7230561E-002 2.6903543E-002 -5.5806467E-003  
-1.9106387E-002 2.7658565E-002 -2.4015744E-003  
-2.1251628E-002 2.7775340E-002 4.3852757E-004  
-2.3638414E-002 2.7265849E-002 2.9740111E-003  
-2.6333584E-002 2.6171421E-002 5.1711018E-003  
-2.9247358E-002 2.4449649E-002 7.0988530E-003  
-3.2451147E-002 2.2129645E-002 8.6647418E-003  
-3.5839746E-002 1.9191718E-002 9.9842839E-003  
-3.8634393E-002 1.6247213E-002 1.0583538E-002  
-4.1025257E-002 1.3214795E-002 1.0935377E-002  
-4.2940625E-002 1.0052517E-002 1.1115830E-002  
-4.4490490E-002 6.8085294E-003 1.0993538E-002  
-4.5675930E-002 3.4872962E-003 1.0569772E-002  
-4.6413677E-002 4.0773454E-005 9.9542457E-003  
-4.6782281E-002 -3.5045353E-003 9.0638268E-003  
-4.6726849E-002 -7.1658321E-003 7.9452458E-003  
-4.6170795E-002 -1.0959397E-002 6.6658125E-003  
-4.4924287E-002 -1.4133553E-002 5.2596370E-003  
-4.3292494E-002 -1.6828201E-002 3.9599113E-003  
-4.1278312E-002 -1.8980179E-002 2.7928511E-003  
-3.8950144E-002 -2.0591886E-002 1.6718862E-003  
-3.6320218E-002 -2.1639970E-002 6.1561409E-004  
-3.3442709E-002 -2.2203661E-002 -4.9480601E-004  
-3.0289653E-002 -2.2273236E-002 -1.6154723E-003  
-2.6891996E-002 -2.1867616E-002 -2.8542607E-003  
-2.3207401E-002 -2.0957335E-002 -4.1088546E-003  
-2.0254733E-002 -1.8885524E-002 -5.5781999E-003  
-1.7872586E-002 -1.6659497E-002 -6.9785498E-003  
-1.6026006E-002 -1.4253271E-002 -8.3304745E-003  
-1.4639961E-002 -1.1585602E-002 -9.3233938E-003  
-1.3741271E-002 -8.6924217E-003 -1.0166175E-002  
-1.3353331E-002 -5.5712342E-003 -1.0787074E-002  
-1.3445882E-002 -2.1795575E-003 -1.1128905E-002  
-1.4026234E-002 1.4575195E-003 -1.1143422E-002  
-1.5095628E-002 5.3072117E-003 -1.0825929E-002  
-1.6963224E-002 8.4260308E-003 -1.0187538E-002  
-1.8984753E-002 1.0969971E-002 -9.4016679E-003  
-2.1127194E-002 1.2888053E-002 -8.3914836E-003  
-2.3408593E-002 1.4230575E-002 -7.3723422E-003  
-2.5833560E-002 1.4999281E-002 -6.3673713E-003  
-2.8428639E-002 1.5223520E-002 -5.4133424E-003  
-3.1157280E-002 1.4858230E-002 -4.4063194E-003  
-3.4057872E-002 1.3933138E-002 -3.4402993E-003  
-3.7147866E-002 1.2480514E-002 -2.5180703E-003  
-3.9452568E-002 1.1055913E-002 -1.9242869E-003  
-4.1310907E-002 9.3793430E-003 -1.3807281E-003

-4.2913334E-002 7.5630956E-003 -1.1213384E-003  
-4.4110818E-002 5.4884019E-003 -9.8146200E-004  
-4.4991193E-002 3.2426888E-003 -1.0621608E-003  
-4.5509922E-002 7.8478364E-004 -1.3190800E-003  
-4.5674611E-002 -1.8761588E-003 -1.7347997E-003  
-4.5626740E-002 -4.7334195E-003 -2.4247067E-003  
-4.4893562E-002 -7.7845774E-003 -3.0329884E-003  
-4.3770110E-002 -9.8045323E-003 -3.9660895E-003  
-4.2436165E-002 -1.1500284E-002 -4.8595257E-003  
-4.0909345E-002 -1.2839405E-002 -5.7117881E-003  
-3.9224438E-002 -1.3827337E-002 -6.5604418E-003  
-3.7389947E-002 -1.4465663E-002 -7.4198826E-003  
-3.5476859E-002 -1.4830089E-002 -8.3849554E-003  
-3.3396751E-002 -1.4851764E-002 -9.3756903E-003  
-3.1193758E-002 -1.4577924E-002 -1.0438745E-002  
-2.8825837E-002 -1.3920729E-002 -1.1456645E-002  
-2.4642207E-002 -9.3083711E-003 -1.4759695E-002  
-2.1745822E-002 -4.3319120E-003 -1.6376886E-002  
-2.0575965E-002 -3.2639839E-006 -1.5977780E-002  
-2.0785233E-002 3.2902286E-003 -1.5634952E-002  
-2.2237401E-002 5.8653057E-003 -1.5318689E-002  
-2.4902436E-002 8.2202000E-003 -1.5504583E-002  
-2.9514658E-002 1.0858738E-002 -1.6347789E-002  
-3.6361914E-002 1.1844640E-002 -1.5360729E-002  
-4.1560667E-002 9.3416206E-003 -1.0296712E-002  
-4.3247199E-002 5.1974199E-003 -1.6380304E-002  
-4.2888450E-002 -1.8546347E-003 -2.0720509E-002  
-3.8671160E-002 -6.7640306E-003 -1.9436303E-002  
-3.6918300E-002 -8.9848688E-003 -1.8699512E-002  
-3.6173084E-002 -1.0000224E-002 -1.8378611E-002  
-3.6268084E-002 -1.0131639E-002 -1.8250353E-002  
-3.7004860E-002 -9.6881844E-003 -1.8226586E-002  
-3.9066970E-002 -9.0386209E-003 -1.9203535E-002  
5.9129055E-003 -2.4349504E-003 1.7894818E-002  
9.9571359E-003 -4.1590195E-003 2.1001953E-002  
1.4452328E-002 -5.4322787E-003 2.3170753E-002  
1.8760865E-002 -6.4148267E-003 2.4581528E-002  
2.2581307E-002 -7.2152751E-003 2.5919692E-002  
2.6243638E-002 -7.7685320E-003 2.6674257E-002  
2.9446940E-002 -8.2013895E-003 2.7619933E-002  
3.2512543E-002 -8.2505819E-003 2.7473514E-002  
3.5402918E-002 -8.0316794E-003 2.6907339E-002  
3.7913226E-002 -7.5282678E-003 2.5745628E-002

'Coordinates for shape change graph for 'PC2' from 'PCA: CovMatrix,  
Tragulidae, Procrustes coordinates' in the MorphoJ project named 'new  
project...'

'The scale factor used for the shape change is -0.1

'Generated by MorphoJ, version 1.06d

1 2L 2058 1 9999 Dim=3

starting\_shape

PC2 hypothetical value -0.1

4.0608703E-002 -9.7871335E-003 2.3029292E-002  
2.4114897E-002 -2.8573231E-002 -1.0973601E-002  
2.5321920E-002 -2.9503887E-002 -1.2744875E-002  
2.7011522E-002 -3.0666583E-002 -1.3812276E-002  
2.8852052E-002 -3.1748846E-002 -1.4363195E-002

3.0810386E-002 -3.2755895E-002 -1.4528125E-002  
3.2925174E-002 -3.3723074E-002 -1.4335492E-002  
3.5241587E-002 -3.4672314E-002 -1.3777389E-002  
3.7756438E-002 -3.5606888E-002 -1.2854293E-002  
4.0454369E-002 -3.6498515E-002 -1.1482194E-002  
4.3231319E-002 -3.7293054E-002 -9.5247877E-003  
4.5801849E-002 -3.7987752E-002 -7.1808873E-003  
4.7988393E-002 -3.8228121E-002 -4.6576194E-003  
4.9720656E-002 -3.8131321E-002 -2.0133942E-003  
5.1107868E-002 -3.7715626E-002 7.1402955E-004  
5.2118292E-002 -3.7015534E-002 3.3512582E-003  
5.2786404E-002 -3.5982675E-002 6.1266717E-003  
5.3210546E-002 -3.4612294E-002 9.0816613E-003  
5.3179410E-002 -3.2910324E-002 1.2050018E-002  
5.2695567E-002 -3.0880906E-002 1.5066584E-002  
5.1622200E-002 -2.7949433E-002 1.8004775E-002  
4.9971551E-002 -2.5144339E-002 2.0274598E-002  
4.7827436E-002 -2.2490358E-002 2.1898818E-002  
4.5233021E-002 -1.9951857E-002 2.2896139E-002  
4.2160571E-002 -1.7542229E-002 2.3242681E-002  
3.8569481E-002 -1.5304769E-002 2.2901458E-002  
3.4549415E-002 -1.3138546E-002 2.1927896E-002  
3.0103048E-002 -1.0862733E-002 2.0437527E-002  
2.5148579E-002 -8.8191935E-003 1.8249646E-002  
2.3144366E-002 -7.8409346E-003 1.6791539E-002  
2.1441702E-002 -7.2571906E-003 1.5280402E-002  
2.0106091E-002 -7.2326208E-003 1.3671190E-002  
1.9203879E-002 -7.7812080E-003 1.1990936E-002  
1.8665150E-002 -8.8043618E-003 1.0246202E-002  
1.8484485E-002 -1.0331841E-002 8.4276930E-003  
1.8540212E-002 -1.2296599E-002 6.4736948E-003  
1.8837079E-002 -1.4753106E-002 4.3271425E-003  
1.9760022E-002 -1.7756764E-002 2.3201477E-003  
2.0987196E-002 -1.9517981E-002 1.7621757E-003  
2.2257046E-002 -2.1187247E-002 1.2057654E-003  
2.3249589E-002 -2.2696151E-002 2.9337603E-004  
2.3963252E-002 -2.4044517E-002 -9.1885541E-004  
2.4434507E-002 -2.5236517E-002 -2.4030918E-003  
2.4664563E-002 -2.6293304E-002 -4.1531026E-003  
2.4580030E-002 -2.7144756E-002 -6.2400791E-003  
2.4222122E-002 -2.7740358E-002 -8.6554506E-003  
1.7969908E-002 -2.8019034E-002 -1.5356180E-002  
2.0014581E-002 -2.9296105E-002 -1.6830318E-002  
2.2282921E-002 -3.0487875E-002 -1.7799803E-002  
2.4644739E-002 -3.1588256E-002 -1.8340109E-002  
2.7045132E-002 -3.2708437E-002 -1.8624664E-002  
2.9501803E-002 -3.3748587E-002 -1.8562197E-002  
3.2033870E-002 -3.4770009E-002 -1.8188504E-002  
3.4640345E-002 -3.5740041E-002 -1.7468159E-002  
3.7330328E-002 -3.6700492E-002 -1.6427402E-002  
4.0091568E-002 -3.7589098E-002 -1.5010781E-002  
4.2021600E-002 -3.8224858E-002 -1.3782042E-002  
4.3843264E-002 -3.8720695E-002 -1.2419099E-002  
4.5557229E-002 -3.9127631E-002 -1.0956925E-002  
4.7178010E-002 -3.9443075E-002 -9.3913309E-003  
4.8700464E-002 -3.9660446E-002 -7.7067636E-003  
5.0130505E-002 -3.9777878E-002 -5.8914132E-003  
5.1435185E-002 -3.9747319E-002 -3.9275736E-003  
5.2635967E-002 -3.9608342E-002 -1.8333096E-003  
5.3641369E-002 -3.9233778E-002 4.0392323E-004



5.4440963E-002 -3.8754274E-002 2.5707880E-003  
5.5045962E-002 -3.8101561E-002 4.6821648E-003  
5.5495398E-002 -3.7340561E-002 6.7234026E-003  
5.5811012E-002 -3.6477119E-002 8.7025246E-003  
5.5953064E-002 -3.5497184E-002 1.0609842E-002  
5.6001785E-002 -3.4438263E-002 1.2474337E-002  
5.5877844E-002 -3.3250041E-002 1.4270213E-002  
5.5616957E-002 -3.1949296E-002 1.6000999E-002  
5.5174978E-002 -3.0512364E-002 1.7641135E-002  
5.4529313E-002 -2.8543154E-002 1.9609758E-002  
5.3546221E-002 -2.6521139E-002 2.1329978E-002  
5.2250887E-002 -2.4393782E-002 2.2879139E-002  
5.0561233E-002 -2.2155578E-002 2.4146766E-002  
4.8495049E-002 -1.9790331E-002 2.5118478E-002  
4.6025220E-002 -1.7301904E-002 2.5692058E-002  
4.3213911E-002 -1.4695145E-002 2.5966899E-002  
4.0100885E-002 -1.1917023E-002 2.6422887E-002  
3.6594325E-002 -9.1103374E-003 2.6376031E-002  
1.9356807E-002 2.4765107E-002 6.1950640E-003  
2.0305571E-002 2.5993149E-002 4.4721739E-003  
2.1851884E-002 2.7303785E-002 3.1276342E-003  
2.3721848E-002 2.8354086E-002 2.1362320E-003  
2.5700161E-002 2.9127446E-002 1.3332189E-003  
2.7759379E-002 2.9727923E-002 6.2817186E-004  
2.9945701E-002 3.0170701E-002 3.5932138E-005  
3.2284650E-002 3.0506406E-002 -4.9724910E-004  
3.4803868E-002 3.0670915E-002 -8.8636274E-004  
3.7494576E-002 3.0615454E-002 -1.0852455E-003  
4.0026087E-002 3.0072002E-002 -9.9585837E-004  
4.2550469E-002 2.9576649E-002 -9.3729335E-004  
4.4835615E-002 2.8731121E-002 -5.7232683E-004  
4.6920304E-002 2.7651385E-002 2.5528878E-005  
4.8872060E-002 2.6377664E-002 7.7476574E-004  
5.0700654E-002 2.4887122E-002 1.6827618E-003  
5.2362607E-002 2.3179036E-002 2.8033686E-003  
5.3873747E-002 2.1219088E-002 4.1037817E-003  
5.5107557E-002 1.9019741E-002 5.6518274E-003  
5.6354670E-002 1.5249092E-002 8.1271149E-003  
5.6686863E-002 1.1745166E-002 1.0572854E-002  
5.6263888E-002 8.6541368E-003 1.2871620E-002  
5.5233370E-002 5.9167501E-003 1.4963524E-002  
5.3654049E-002 3.4586062E-003 1.6857551E-002  
5.1546912E-002 1.1859374E-003 1.8574710E-002  
4.8733847E-002 -7.8278263E-004 2.0141291E-002  
4.5154637E-002 -2.2842375E-003 2.1554118E-002  
4.0914386E-002 -3.0702949E-003 2.2832292E-002  
3.5972312E-002 -3.1914287E-003 2.2270854E-002  
3.1590063E-002 -2.7425333E-003 2.1650006E-002  
2.7827716E-002 -1.8569454E-003 2.0990218E-002  
2.4623890E-002 -8.1027675E-004 2.0242906E-002  
2.1966506E-002 5.1537830E-004 1.9407850E-002  
1.9890226E-002 2.3098475E-003 1.8533815E-002  
1.8452094E-002 4.5644453E-003 1.7605542E-002  
1.7502223E-002 7.1510459E-003 1.6505577E-002  
1.7280327E-002 1.0085901E-002 1.5641726E-002  
1.8206500E-002 1.1947892E-002 1.5487361E-002  
1.9234613E-002 1.3784783E-002 1.5353621E-002  
1.9991477E-002 1.5558139E-002 1.4905683E-002  
2.0516198E-002 1.7257458E-002 1.4176697E-002  
2.0797577E-002 1.8895391E-002 1.3173241E-002

2.0842204E-002 2.0488659E-002 1.1900275E-002  
2.0492066E-002 2.1948201E-002 1.0202855E-002  
1.9777636E-002 2.3267028E-002 8.1392709E-003  
1.2137528E-002 2.6255787E-002 4.6683279E-003  
1.3576774E-002 2.7799233E-002 3.5122662E-003  
1.5341149E-002 2.9080029E-002 2.4511919E-003  
1.7300965E-002 3.0140391E-002 1.4822245E-003  
1.9392238E-002 3.1051946E-002 5.9048138E-004  
2.1618856E-002 3.1808472E-002 -2.2455537E-004  
2.3973898E-002 3.2469333E-002 -9.6368114E-004  
2.6474596E-002 3.3014446E-002 -1.6395860E-003  
2.9120669E-002 3.3451651E-002 -2.2465994E-003  
3.1918664E-002 3.3728916E-002 -2.7642755E-003  
3.4198262E-002 3.3814823E-002 -3.0921664E-003  
3.6441019E-002 3.3648544E-002 -3.2707861E-003  
3.8610125E-002 3.3333993E-002 -3.2692791E-003  
4.0737854E-002 3.2891820E-002 -3.1692096E-003  
4.2821917E-002 3.2266912E-002 -2.9557314E-003  
4.4848869E-002 3.1527368E-002 -2.6020090E-003  
4.6822079E-002 3.0632641E-002 -2.1029154E-003  
4.8775202E-002 2.9595645E-002 -1.5093497E-003  
5.0635944E-002 2.8355515E-002 -7.5616279E-004  
5.2599616E-002 2.6794396E-002 2.2815072E-004  
5.4318030E-002 2.5109307E-002 1.3025973E-003  
5.5805453E-002 2.3330705E-002 2.4736262E-003  
5.7045199E-002 2.1447211E-002 3.7259761E-003  
5.8018612E-002 1.9477471E-002 5.0848119E-003  
5.8793731E-002 1.7395178E-002 6.5264566E-003  
5.9373373E-002 1.5177305E-002 8.0483614E-003  
5.9667721E-002 1.2875043E-002 9.6845305E-003  
5.9596918E-002 1.0441223E-002 1.1370401E-002  
5.8911437E-002 7.2643065E-003 1.3720746E-002  
5.7787658E-002 4.3220764E-003 1.5917967E-002  
5.6153170E-002 1.6477450E-003 1.7925604E-002  
5.4081884E-002 -7.7686089E-004 1.9778198E-002  
5.1555932E-002 -2.9754703E-003 2.1462653E-002  
4.8489890E-002 -4.8693647E-003 2.2903723E-002  
4.4925880E-002 -6.4890093E-003 2.4113485E-002  
4.1041543E-002 -7.9449613E-003 2.5405348E-002  
3.6594325E-002 -9.1103374E-003 2.6376031E-002  
2.4779385E-002 -7.6774117E-003 -1.7548036E-002  
2.5398601E-002 -7.0550645E-003 -1.8651195E-002  
2.6159505E-002 -6.1310566E-003 -1.9551326E-002  
2.6979573E-002 -4.9870639E-003 -2.0267586E-002  
2.7831094E-002 -3.6558015E-003 -2.0820781E-002  
2.8711355E-002 -2.1453690E-003 -2.1234238E-002  
2.9596618E-002 -4.4666496E-004 -2.1592325E-002  
3.0497908E-002 1.4522744E-003 -2.1888549E-002  
3.1415544E-002 3.5572768E-003 -2.2127234E-002  
3.2384155E-002 5.8488292E-003 -2.2155422E-002  
3.3229461E-002 7.4912311E-003 -2.2130070E-002  
3.4064030E-002 9.0622700E-003 -2.1888877E-002  
3.4844979E-002 1.0581069E-002 -2.1560971E-002  
3.5606539E-002 1.2032689E-002 -2.1078794E-002  
3.6324056E-002 1.3487541E-002 -2.0473043E-002  
3.7010263E-002 1.4813154E-002 -1.9721955E-002  
3.7669994E-002 1.6058280E-002 -1.8849586E-002  
3.8302692E-002 1.7368030E-002 -1.7828428E-002  
3.8869539E-002 1.8479121E-002 -1.6687860E-002  
3.9421225E-002 1.9846818E-002 -1.5288169E-002

3.9829943E-002 2.0984725E-002 -1.3805730E-002  
4.0101389E-002 2.1930184E-002 -1.2234022E-002  
4.0224974E-002 2.2680110E-002 -1.0605474E-002  
4.0231371E-002 2.3232965E-002 -8.8997343E-003  
4.0100521E-002 2.3589038E-002 -7.1250224E-003  
3.9851955E-002 2.3807030E-002 -5.2676504E-003  
3.9477516E-002 2.3811039E-002 -3.3128742E-003  
3.8959868E-002 2.3576783E-002 -1.2818769E-003  
3.7714838E-002 2.2741721E-002 2.0346168E-003  
3.6255645E-002 2.1484742E-002 4.7569438E-003  
3.4677586E-002 2.0043080E-002 6.9850885E-003  
3.2939117E-002 1.8372100E-002 8.6661834E-003  
3.1051157E-002 1.6595525E-002 9.9289351E-003  
2.8987778E-002 1.4598698E-002 1.0719098E-002  
2.6772627E-002 1.2377913E-002 1.1011181E-002  
2.4404371E-002 9.9365168E-003 1.0732204E-002  
2.1961766E-002 7.2793024E-003 9.7655853E-003  
2.1086612E-002 5.2310811E-003 8.9570027E-003  
2.0378775E-002 3.2952673E-003 7.9644227E-003  
2.0006865E-002 1.4453501E-003 6.7858921E-003  
1.9754439E-002 -2.7387242E-004 5.5738066E-003  
1.9506432E-002 -1.8400868E-003 4.2657055E-003  
1.9350804E-002 -3.2907558E-003 2.8362697E-003  
1.9247973E-002 -4.6944352E-003 1.2302977E-003  
1.9530484E-002 -6.0252777E-003 -4.4830437E-004  
2.0554787E-002 -6.9208873E-003 -1.9716761E-003  
2.1271092E-002 -6.5181639E-003 -3.3565927E-003  
2.2134831E-002 -6.0704558E-003 -4.7426302E-003  
2.2964669E-002 -5.6970278E-003 -6.2232181E-003  
2.3605766E-002 -5.5514112E-003 -7.8288064E-003  
2.4039962E-002 -5.6633944E-003 -9.5582893E-003  
2.4243903E-002 -6.0623931E-003 -1.1433180E-002  
2.4195452E-002 -6.7537554E-003 -1.3494119E-002  
2.4143126E-002 -7.4967810E-003 -1.5710491E-002  
2.3171219E-002 -1.3046298E-002 -2.0781587E-002  
2.4253466E-002 -1.1843884E-002 -2.1770399E-002  
2.5286527E-002 -1.0496226E-002 -2.2627419E-002  
2.6260441E-002 -9.0056843E-003 -2.3338537E-002  
2.7179044E-002 -7.4095011E-003 -2.3944837E-002  
2.8063316E-002 -5.7069878E-003 -2.4399208E-002  
2.8911318E-002 -3.8962713E-003 -2.4725623E-002  
2.9722098E-002 -1.9930376E-003 -2.4950106E-002  
3.0500587E-002 1.5733905E-005 -2.5162327E-002  
3.1276339E-002 2.1078534E-003 -2.5353605E-002  
3.2067086E-002 4.0849791E-003 -2.5418188E-002  
3.2891497E-002 5.9831493E-003 -2.5416085E-002  
3.3689314E-002 7.8170648E-003 -2.5252651E-002  
3.4512483E-002 9.5827332E-003 -2.4965196E-002  
3.5334567E-002 1.1284841E-002 -2.4576062E-002  
3.6146198E-002 1.2928310E-002 -2.4015316E-002  
3.6941479E-002 1.4504162E-002 -2.3288350E-002  
3.7789066E-002 1.6013069E-002 -2.2458865E-002  
3.8558546E-002 1.7456610E-002 -2.1457432E-002  
3.8884753E-002 1.9819457E-002 -1.9400419E-002  
4.0106671E-002 2.1835818E-002 -1.7664434E-002  
4.0924293E-002 2.3464245E-002 -1.5755318E-002  
4.1461438E-002 2.4778456E-002 -1.3658366E-002  
4.1860626E-002 2.5704154E-002 -1.1478334E-002  
4.1941165E-002 2.6432383E-002 -8.9890025E-003  
4.1828655E-002 2.6848285E-002 -6.3149706E-003

4.1662706E-002 2.7083688E-002 -3.4411546E-003  
4.1008440E-002 2.6720199E-002 -4.9133271E-004  
4.0040199E-002 2.6008279E-002 3.2484902E-003  
3.8479107E-002 2.4630868E-002 6.3724641E-003  
3.6854595E-002 2.3080287E-002 9.0533287E-003  
3.5011081E-002 2.1259618E-002 1.1235843E-002  
3.2979904E-002 1.9170578E-002 1.2976202E-002  
3.0704001E-002 1.6784639E-002 1.4227585E-002  
2.8187246E-002 1.4097599E-002 1.4982068E-002  
2.5423644E-002 1.1112461E-002 1.5223828E-002  
2.2450606E-002 7.8718217E-003 1.4897519E-002  
1.3119738E-002 8.1011753E-004 -5.9902751E-003  
1.2119881E-002 1.3327859E-003 -6.1510246E-003  
1.1101526E-002 1.7410568E-003 -6.3538222E-003  
1.0086893E-002 1.9958072E-003 -6.5182121E-003  
9.0972417E-003 2.1208677E-003 -6.6882065E-003  
8.1622276E-003 2.1774881E-003 -6.7869308E-003  
7.2017974E-003 2.2208606E-003 -7.0672344E-003  
6.2707961E-003 1.8361653E-003 -7.0189178E-003  
5.3340420E-003 1.4761929E-003 -7.0916276E-003  
4.3751473E-003 1.0006431E-003 -7.2239416E-003  
3.1888405E-003 4.9737364E-004 -7.2653919E-003  
2.1722350E-003 -9.0214737E-005 -7.3236642E-003  
1.3396076E-003 -7.5967493E-004 -7.4224875E-003  
6.7824556E-004 -1.5259792E-003 -7.5917624E-003  
1.8559405E-004 -2.3830097E-003 -7.7895516E-003  
-1.2641041E-004 -3.3707062E-003 -8.0226371E-003  
-2.3340308E-004 -4.4770578E-003 -8.2751204E-003  
-1.2205196E-004 -5.7094139E-003 -8.5267871E-003  
2.5350168E-004 -7.0066539E-003 -8.7412176E-003  
1.2659621E-003 -7.8160882E-003 -9.2468785E-003  
2.3152754E-003 -8.4027375E-003 -9.6615561E-003  
3.3606385E-003 -8.7519359E-003 -9.9701273E-003  
4.3850902E-003 -8.8916481E-003 -1.0149262E-002  
5.3677288E-003 -8.8546087E-003 -1.0295850E-002  
6.3441421E-003 -8.6126460E-003 -1.0335604E-002  
7.3150620E-003 -8.1996432E-003 -1.0308275E-002  
8.2833572E-003 -7.5433538E-003 -1.0212246E-002  
9.2261781E-003 -6.7127890E-003 -9.9616028E-003  
1.0111897E-002 -6.0319331E-003 -9.6555447E-003  
1.0886535E-002 -5.3100779E-003 -9.2915859E-003  
1.1529310E-002 -4.5543951E-003 -8.8766141E-003  
1.2087707E-002 -3.7642497E-003 -8.4683445E-003  
1.2543804E-002 -2.9375359E-003 -8.0633098E-003  
1.2880607E-002 -2.0594353E-003 -7.6049478E-003  
1.3095995E-002 -1.1331966E-003 -7.1003908E-003  
1.3197680E-002 -1.5255094E-004 -6.6050173E-003  
-2.7683078E-002 1.7182696E-002 1.9410468E-002  
-3.0228873E-002 1.9845864E-002 1.8117246E-002  
-3.2201997E-002 2.1779862E-002 1.7114244E-002  
-3.4783765E-002 2.3531171E-002 1.4591000E-002  
-3.5548425E-002 2.3485468E-002 1.3068783E-002  
-3.6182808E-002 2.2981341E-002 1.1257246E-002  
-3.6390737E-002 2.1612325E-002 8.9539941E-003  
-3.7549336E-002 -1.1488581E-002 1.7153890E-002  
-4.0125930E-002 -1.1959336E-002 1.6254021E-002  
-4.2132130E-002 -1.2304301E-002 1.5422944E-002  
-4.3532784E-002 -1.2378171E-002 1.4373832E-002  
-4.4781772E-002 -1.1973248E-002 1.1885515E-002  
-4.4882344E-002 -1.1595358E-002 1.0412001E-002

-4.4586981E-002 -1.1021636E-002 8.6448682E-003  
-1.7373731E-002 -2.0399894E-002 5.5009745E-003  
-1.7830018E-002 -2.1651171E-002 3.9064901E-003  
-1.8247212E-002 -2.2632934E-002 2.5217158E-003  
-1.8782521E-002 -2.3164146E-002 1.2345732E-003  
-2.0202560E-002 -2.2884781E-002 -1.1069141E-003  
-2.1082580E-002 -2.2165391E-002 -2.2241291E-003  
-2.2108583E-002 -2.1018110E-002 -3.3092306E-003  
-3.2445548E-002 1.1453935E-002 4.1860369E-003  
-3.3685633E-002 1.2804319E-002 3.3735492E-003  
-3.4668381E-002 1.3577179E-002 2.3677816E-003  
-3.5372082E-002 1.3838133E-002 1.3439191E-003  
-3.6172618E-002 1.3406023E-002 -7.1322251E-004  
-3.6352025E-002 1.2770025E-002 -1.8843472E-003  
-3.6375146E-002 1.1776921E-002 -3.2226084E-003  
-3.8493393E-002 -8.7977185E-003 6.2964295E-003  
-4.1105439E-002 -9.0602568E-003 5.2289212E-003  
-4.2390538E-002 -9.1552141E-003 3.9910594E-003  
-4.3691662E-002 -9.2253885E-003 2.0644556E-003  
-4.3863291E-002 -9.0609495E-003 1.0502744E-003  
-4.3849586E-002 -8.7819353E-003 -1.0548108E-004  
-4.3561127E-002 -8.3206225E-003 -1.4831023E-003  
-2.3248996E-002 -1.4801159E-002 -1.9340083E-003  
-2.3624777E-002 -1.6911009E-002 -3.9228625E-003  
-2.4992124E-002 -1.6726967E-002 -5.8707290E-003  
-2.5905792E-002 -1.7033890E-002 -7.8491392E-003  
-2.6437071E-002 -1.6737142E-002 -8.6559787E-003  
-2.7070305E-002 -1.6232639E-002 -9.4634560E-003  
-2.7851627E-002 -1.5416334E-002 -1.0288931E-002  
1.0897451E-002 1.5626175E-002 2.2511334E-005  
9.8775794E-003 1.5104033E-002 4.6265832E-004  
8.6697572E-003 1.3988047E-002 1.4033813E-003  
6.1507575E-003 1.4881583E-002 8.1772218E-004  
4.2794931E-003 1.4793861E-002 1.3282020E-003  
2.3614897E-003 1.4978350E-002 1.8389422E-003  
1.6327756E-004 1.5097386E-002 2.7081661E-003  
-2.2335062E-003 1.4979701E-002 3.9943866E-003  
-4.7839861E-003 1.4585216E-002 5.5505021E-003  
-7.4261218E-003 1.4327716E-002 7.2014024E-003  
-9.0534143E-003 1.4149340E-002 7.9604636E-003  
-1.0739908E-002 1.4000824E-002 8.7131240E-003  
-1.2459266E-002 1.3813399E-002 9.4472228E-003  
-1.4204749E-002 1.3470690E-002 1.0205448E-002  
-1.5990758E-002 1.3090784E-002 1.0931881E-002  
-1.7804152E-002 1.2550707E-002 1.1693964E-002  
-1.9650017E-002 1.1871844E-002 1.2473617E-002  
-2.1510184E-002 1.1035451E-002 1.3280888E-002  
-2.3297528E-002 9.9406388E-003 1.4131722E-002  
-2.5543477E-002 8.1534496E-003 1.4713921E-002  
-2.7446171E-002 6.3050138E-003 1.5145231E-002  
-2.9061930E-002 4.4077809E-003 1.5406458E-002  
-3.0323908E-002 2.4389309E-003 1.5536324E-002  
-3.1331976E-002 4.5044154E-004 1.5510369E-002  
-3.1965363E-002 -1.6137939E-003 1.5339714E-002  
-3.2320277E-002 -3.7461558E-003 1.5023915E-002  
-3.2322625E-002 -5.9330476E-003 1.4547505E-002  
-3.1903219E-002 -8.1532314E-003 1.3981946E-002  
-3.1131418E-002 -9.9466275E-003 1.3312022E-002  
-3.0205011E-002 -1.1483269E-002 1.2577118E-002  
-2.9028197E-002 -1.2680200E-002 1.1849007E-002

-2.7716275E-002 -1.3613172E-002 1.1081082E-002  
-2.6266066E-002 -1.4250344E-002 1.0294633E-002  
-2.4704640E-002 -1.4656472E-002 9.4088781E-003  
-2.2978232E-002 -1.4783998E-002 8.5283388E-003  
-2.1098547E-002 -1.4661628E-002 7.5672489E-003  
-1.9058148E-002 -1.4145168E-002 6.6458340E-003  
-1.6542792E-002 -1.1199275E-002 2.6718885E-003  
-1.4905681E-002 -6.8784677E-003 7.5732010E-004  
-1.4740106E-002 -3.0504783E-003 6.5789577E-004  
-1.5202450E-002 -2.1637094E-004 2.8525548E-004  
-1.6297424E-002 2.0087466E-003 1.2956150E-005  
-1.8064830E-002 3.8896395E-003 -2.0214454E-004  
-2.0823902E-002 5.6805211E-003 -4.1236396E-004  
-2.4839368E-002 7.0193968E-003 3.4388854E-004  
-2.8670106E-002 6.4680847E-003 2.8753324E-003  
-3.3012124E-002 3.6941834E-003 2.2088704E-003  
-3.4852613E-002 -2.3748365E-004 2.4261538E-003  
-3.4962579E-002 -2.9356743E-003 2.7865500E-003  
-3.4461217E-002 -4.7447869E-003 2.4452504E-003  
-3.3814600E-002 -6.1458940E-003 1.8001790E-003  
-3.2893666E-002 -7.3773904E-003 7.2788689E-004  
-3.1409094E-002 -8.6434772E-003 -1.1650760E-003  
-2.8275812E-002 -8.9278350E-003 -3.4019314E-003  
-2.4232950E-002 -7.1771788E-003 -3.6125687E-003  
-2.6516168E-002 -4.0453976E-003 -7.5475450E-003  
-2.8074945E-002 3.6931206E-004 -7.7105844E-003  
-2.8905355E-002 2.4968211E-003 -6.0024735E-003  
-2.9438231E-002 2.4044452E-003 -4.8319074E-003  
-3.0233418E-002 2.1574059E-003 -5.6356765E-003  
-3.1111665E-002 8.7708583E-004 -7.2284881E-003  
-3.0512562E-002 -2.8898936E-003 -8.9557046E-003  
-3.4673559E-002 -2.6148947E-003 -1.4382432E-002  
-2.9695803E-003 2.3564773E-002 1.1663972E-002  
-5.1139059E-003 2.3194274E-002 1.1738421E-002  
-7.3409119E-003 2.2677515E-002 1.2159865E-002  
-9.5818026E-003 2.1964691E-002 1.2843219E-002  
-1.1877189E-002 2.1045531E-002 1.3612530E-002  
-1.4256434E-002 1.9931550E-002 1.4496710E-002  
-1.6788939E-002 1.8635855E-002 1.5465111E-002  
-1.9454498E-002 1.7162709E-002 1.6540572E-002  
-2.2278192E-002 1.5507373E-002 1.7652218E-002  
-2.5223677E-002 1.3689861E-002 1.8826376E-002  
-2.7642963E-002 1.1287954E-002 1.9507047E-002  
-2.9728086E-002 8.8094876E-003 1.9954433E-002  
-3.1490270E-002 6.2787203E-003 2.0150844E-002  
-3.2886970E-002 3.6566571E-003 2.0166358E-002  
-3.3979039E-002 9.9103309E-004 1.9896992E-002  
-3.4715231E-002 -1.7580204E-003 1.9419320E-002  
-3.5084828E-002 -4.5993846E-003 1.8750561E-002  
-3.5087655E-002 -7.5270620E-003 1.7906336E-002  
-3.4676762E-002 -1.0557823E-002 1.7009088E-002  
-3.3301050E-002 -1.2945860E-002 1.5904941E-002  
-3.1757993E-002 -1.4976096E-002 1.4886544E-002  
-3.0061314E-002 -1.6634338E-002 1.3896248E-002  
-2.8238399E-002 -1.7922070E-002 1.2866163E-002  
-2.6282311E-002 -1.8827171E-002 1.1796921E-002  
-2.4189366E-002 -1.9352798E-002 1.0701525E-002  
-2.1947454E-002 -1.9512337E-002 9.5770121E-003  
-1.9611974E-002 -1.9251560E-002 8.3478301E-003  
-1.7231833E-002 -1.8566527E-002 6.9814849E-003

-1.4044597E-002 -1.5927367E-002 5.1853771E-003  
-1.1795052E-002 -1.3102319E-002 3.5047798E-003  
-1.0376122E-002 -1.0186821E-002 2.0790633E-003  
-9.7775623E-003 -7.2010712E-003 9.1387892E-004  
-9.9026516E-003 -4.1159703E-003 8.9719694E-005  
-1.0806100E-002 -9.1189075E-004 -4.2665543E-004  
-1.2495344E-002 2.4032571E-003 -6.6430609E-004  
-1.4981961E-002 5.8294898E-003 -6.1164600E-004  
-1.8213348E-002 9.3812432E-003 -2.1260533E-004  
-2.1636334E-002 1.0188062E-002 1.1187999E-003  
-2.4754401E-002 1.0560245E-002 2.2937121E-003  
-2.7545829E-002 1.0518769E-002 3.3067828E-003  
-3.0005847E-002 1.0057987E-002 4.1698523E-003  
-3.2129662E-002 9.1953461E-003 4.8954293E-003  
-3.3940346E-002 7.9086154E-003 5.4559424E-003  
-3.5421557E-002 6.2138831E-003 5.9227682E-003  
-3.6577273E-002 4.1156760E-003 6.2814031E-003  
-3.7396142E-002 1.5927030E-003 6.3910090E-003  
-3.7502022E-002 -5.2727648E-004 6.2179829E-003  
-3.7451651E-002 -2.5220212E-003 5.8772827E-003  
-3.7146720E-002 -4.2960821E-003 5.4607593E-003  
-3.6657344E-002 -5.9171099E-003 5.0463630E-003  
-3.6025612E-002 -7.3457187E-003 4.5239285E-003  
-3.5155797E-002 -8.6681012E-003 3.9605618E-003  
-3.4062321E-002 -9.8271509E-003 3.4012092E-003  
-3.2892385E-002 -1.0851553E-002 2.6805509E-003  
-3.1482146E-002 -1.1662217E-002 1.9220631E-003  
-2.9885583E-002 -1.2198086E-002 8.4715287E-004  
-2.8419661E-002 -1.2395987E-002 -2.0503583E-004  
-2.6860530E-002 -1.2312804E-002 -9.9267875E-004  
-2.5675620E-002 -1.1930961E-002 -1.8658284E-003  
-2.4517248E-002 -1.1263734E-002 -2.6460330E-003  
-2.3453215E-002 -1.0273495E-002 -3.3561478E-003  
-2.2542541E-002 -8.9615925E-003 -4.0570148E-003  
-2.1801445E-002 -7.3101558E-003 -4.7420627E-003  
-2.1299990E-002 -5.3710568E-003 -5.4945592E-003  
-2.4394508E-002 -2.2107613E-003 -6.4404791E-003  
-2.6201352E-002 1.8742030E-004 -7.2474206E-003  
-2.6806652E-002 2.3735911E-003 -5.7126142E-003  
-2.7677772E-002 3.7713652E-003 -5.0079694E-003  
-2.8716510E-002 4.3834427E-003 -4.9536875E-003  
-3.0073885E-002 3.9961816E-003 -6.0522790E-003  
-2.9213957E-002 2.5852444E-003 -5.7441213E-003  
-3.3610975E-002 -1.2204560E-003 -1.4237527E-002  
1.6497179E-002 1.2720297E-002 -3.8178918E-003  
1.5205868E-002 1.1858583E-002 -5.6106831E-003  
1.3783446E-002 1.1106649E-002 -7.2219295E-003  
1.2299201E-002 1.0608928E-002 -8.7120682E-003  
1.0753687E-002 1.0366428E-002 -1.0082588E-002  
9.1925792E-003 1.0387279E-002 -1.1387332E-002  
7.5872413E-003 1.0662752E-002 -1.2615328E-002  
5.9319919E-003 1.1190372E-002 -1.3750334E-002  
4.1929829E-003 1.1967393E-002 -1.4749499E-002  
2.3680598E-003 1.2973096E-002 -1.5596634E-002  
6.8609384E-004 1.4362247E-002 -1.6059545E-002  
-9.1567338E-004 1.5791846E-002 -1.6317153E-002  
-2.4518869E-003 1.7257824E-002 -1.6336320E-002  
-3.9073673E-003 1.8782518E-002 -1.6141957E-002  
-5.3091131E-003 2.0337067E-002 -1.5705092E-002  
-6.6441645E-003 2.1944154E-002 -1.5032462E-002

-7.9338216E-003 2.3572455E-002 -1.4095631E-002  
-9.1963312E-003 2.5194594E-002 -1.2883750E-002  
-1.0439215E-002 2.6776136E-002 -1.1375842E-002  
-1.1610137E-002 2.8200865E-002 -9.5239395E-003  
-1.2818592E-002 2.9429405E-002 -7.6842287E-003  
-1.4121199E-002 3.0378336E-002 -5.7803139E-003  
-1.5487052E-002 3.1107334E-002 -3.8401170E-003  
-1.6925921E-002 3.1617961E-002 -1.8618931E-003  
-1.8456818E-002 3.1873867E-002 1.5588088E-004  
-2.0073670E-002 3.1884909E-002 2.2275941E-003  
-2.1781015E-002 3.1587523E-002 4.3251492E-003  
-2.3565879E-002 3.1012711E-002 6.4371238E-003  
-2.6094034E-002 2.9935388E-002 8.8747054E-003  
-2.8542285E-002 2.8508866E-002 1.1050280E-002  
-3.0897949E-002 2.6702448E-002 1.2934243E-002  
-3.3192805E-002 2.4581553E-002 1.4580264E-002  
-3.5410538E-002 2.2093561E-002 1.5980707E-002  
-3.7589840E-002 1.9258545E-002 1.7171600E-002  
-3.9676005E-002 1.6004400E-002 1.8086617E-002  
-4.1618582E-002 1.2310874E-002 1.8669606E-002  
-4.3328903E-002 8.2096213E-003 1.8827846E-002  
-4.5011462E-002 2.8823254E-003 1.8216821E-002  
-4.5704011E-002 -2.1238431E-003 1.7185022E-002  
-4.5507801E-002 -6.6084260E-003 1.5891383E-002  
-4.4663534E-002 -1.0553182E-002 1.4510295E-002  
-4.3234644E-002 -1.3999104E-002 1.3069988E-002  
-4.1289663E-002 -1.7047519E-002 1.1591965E-002  
-3.8746315E-002 -1.9695566E-002 1.0027495E-002  
-3.5551703E-002 -2.1923377E-002 8.3525402E-003  
-3.1647066E-002 -2.3555942E-002 6.5265398E-003  
-2.8526011E-002 -2.4296064E-002 5.1501101E-003  
-2.5564085E-002 -2.4499285E-002 3.7832233E-003  
-2.2811912E-002 -2.4312343E-002 2.4772429E-003  
-2.0275550E-002 -2.3715498E-002 1.2273748E-003  
-1.7959320E-002 -2.2735007E-002 3.2361694E-005  
-1.5831181E-002 -2.1418167E-002 -1.1175030E-003  
-1.3891632E-002 -1.9740708E-002 -2.2228401E-003  
-1.2118726E-002 -1.7708246E-002 -3.2866401E-003  
-1.0612505E-002 -1.5234647E-002 -4.2747259E-003  
-9.5462352E-003 -1.2611400E-002 -5.2856372E-003  
-8.8886211E-003 -9.9685400E-003 -6.1213738E-003  
-8.6102637E-003 -7.3433484E-003 -6.7858978E-003  
-8.6287487E-003 -4.7544825E-003 -7.3145718E-003  
-8.9510316E-003 -2.1883533E-003 -7.7116608E-003  
-9.5944823E-003 3.7765470E-004 -7.9586491E-003  
-1.0565417E-002 2.9448181E-003 -8.0425158E-003  
-1.1914989E-002 5.4895941E-003 -7.9494998E-003  
-1.3690331E-002 7.9300543E-003 -7.6657142E-003  
-1.5757715E-002 1.0403223E-002 -7.0953017E-003  
-1.7964915E-002 1.2394182E-002 -6.4024184E-003  
-2.0271971E-002 1.3899799E-002 -5.6122211E-003  
-2.2635830E-002 1.4987569E-002 -4.7427253E-003  
-2.5068701E-002 1.5651904E-002 -3.7975354E-003  
-2.7587000E-002 1.5921353E-002 -2.7668449E-003  
-3.0207153E-002 1.5743760E-002 -1.6510249E-003  
-3.2910382E-002 1.5080990E-002 -4.4001830E-004  
-3.5635898E-002 1.3835173E-002 8.4234836E-004  
-3.8320030E-002 1.1982356E-002 1.7852835E-003  
-4.0489091E-002 9.8247182E-003 2.5162784E-003  
-4.2182148E-002 7.5011964E-003 3.0549639E-003



-4.3456222E-002 5.0602155E-003 3.4144452E-003  
-4.4321904E-002 2.4914002E-003 3.6059962E-003  
-4.4819106E-002 -2.1778422E-004 3.6380358E-003  
-4.4931506E-002 -3.1021523E-003 3.4975075E-003  
-4.4540843E-002 -6.1582982E-003 3.1524243E-003  
-4.3516925E-002 -9.2682473E-003 2.5506952E-003  
-4.2281588E-002 -1.1686382E-002 1.6001432E-003  
-4.0776099E-002 -1.3669874E-002 5.7198377E-004  
-3.9075260E-002 -1.5239580E-002 -4.8217438E-004  
-3.7232142E-002 -1.6450506E-002 -1.5641022E-003  
-3.5248237E-002 -1.7307595E-002 -2.6712031E-003  
-3.3100931E-002 -1.7826683E-002 -3.8090571E-003  
-3.0787661E-002 -1.8023961E-002 -4.9885802E-003  
-2.8288454E-002 -1.7839198E-002 -6.2054719E-003  
-2.5662277E-002 -1.7101032E-002 -7.4218834E-003  
-2.1060862E-002 -1.3137510E-002 -1.0915949E-002  
-1.8699265E-002 -7.9551609E-003 -1.2986181E-002  
-1.8266734E-002 -3.6780850E-003 -1.3814697E-002  
-1.8850034E-002 -4.1995579E-004 -1.4221684E-002  
-2.0248288E-002 2.3352448E-003 -1.4535873E-002  
-2.2788500E-002 4.9754796E-003 -1.4719305E-002  
-2.7246201E-002 7.4577431E-003 -1.4206059E-002  
-3.3884363E-002 8.7900025E-003 -1.1978160E-002  
-3.9890484E-002 7.2223796E-003 -8.0649005E-003  
-4.1864606E-002 6.7358992E-004 -1.0233387E-002  
-3.9987067E-002 -8.1355875E-003 -1.1874717E-002  
-3.7406867E-002 -1.2433369E-002 -1.1656010E-002  
-3.5920025E-002 -1.3636045E-002 -1.1578390E-002  
-3.5252487E-002 -1.3889042E-002 -1.2110917E-002  
-3.5107595E-002 -1.3444316E-002 -1.3163055E-002  
-3.5303228E-002 -1.1728011E-002 -1.4701623E-002  
-3.5182693E-002 -7.3964797E-003 -1.6233535E-002  
6.2238999E-003 -1.4364031E-002 -6.7930923E-003  
4.0093189E-003 -1.3388330E-002 -6.0537554E-003  
1.9039162E-003 -1.2254128E-002 -5.6629210E-003  
7.2803331E-005 -1.0889017E-002 -5.4801159E-003  
-1.3801859E-003 -9.2380503E-003 -5.4448264E-003  
-2.4003019E-003 -7.2714095E-003 -5.5186837E-003  
-2.9664429E-003 -4.9195868E-003 -5.6757461E-003  
-3.1027723E-003 -2.1133818E-003 -5.8870599E-003  
-3.1394357E-003 9.3063400E-004 -6.4273167E-003  
-3.3695721E-003 3.4034321E-003 -7.8757952E-003  
-4.1046396E-003 5.3466242E-003 -1.0543779E-002  
-5.1578297E-003 7.1720019E-003 -1.2953382E-002  
-6.3038324E-003 9.1604121E-003 -1.4617405E-002  
-7.5694692E-003 1.1224819E-002 -1.5596930E-002  
-9.0038961E-003 1.3264271E-002 -1.5907661E-002  
-1.0627886E-002 1.5318050E-002 -1.5726642E-002  
-1.2486497E-002 1.7396715E-002 -1.5063520E-002  
-1.4542011E-002 1.9498442E-002 -1.3796709E-002  
-1.6721384E-002 2.1641704E-002 -1.1877498E-002  
-1.8863826E-002 2.3098601E-002 -9.5889123E-003  
-2.0844056E-002 2.4129937E-002 -7.1759476E-003  
-2.2754961E-002 2.4734713E-002 -4.7752646E-003  
-2.4678938E-002 2.4909533E-002 -2.4685656E-003  
-2.6663940E-002 2.4645408E-002 -2.8897629E-004  
-2.8742094E-002 2.3949060E-002 1.7481543E-003  
-3.0912090E-002 2.2810865E-002 3.6462004E-003  
-3.3217680E-002 2.1245967E-002 5.3519724E-003  
-3.5615186E-002 1.9258657E-002 6.8964508E-003

-3.8061694E-002 1.6308335E-002 8.1588840E-003  
-4.0171551E-002 1.3284816E-002 9.0445081E-003  
-4.1909553E-002 1.0190714E-002 9.5808506E-003  
-4.3264115E-002 7.0250187E-003 9.7932509E-003  
-4.4221693E-002 3.7821363E-003 9.6899743E-003  
-4.4740536E-002 4.3562175E-004 9.3283893E-003  
-4.4818063E-002 -3.0125081E-003 8.7082076E-003  
-4.4410739E-002 -6.5566762E-003 7.8667241E-003  
-4.3468485E-002 -1.0168381E-002 6.8552466E-003  
-4.2082133E-002 -1.2942653E-002 5.7855938E-003  
-4.0390619E-002 -1.5287184E-002 4.7589773E-003  
-3.8436742E-002 -1.7163337E-002 3.7441067E-003  
-3.6311802E-002 -1.8600992E-002 2.6521478E-003  
-3.4011645E-002 -1.9600389E-002 1.4995838E-003  
-3.1544279E-002 -2.0180821E-002 2.5183182E-004  
-2.8911357E-002 -2.0354673E-002 -1.0919250E-003  
-2.6101308E-002 -2.0113480E-002 -2.5395261E-003  
-2.3105893E-002 -1.9450145E-002 -4.0661773E-003  
-2.0564884E-002 -1.7851943E-002 -5.6577760E-003  
-1.8440062E-002 -1.5977400E-002 -6.9898406E-003  
-1.6780226E-002 -1.3853209E-002 -8.0871293E-003  
-1.5573249E-002 -1.1522276E-002 -8.9966722E-003  
-1.4859005E-002 -8.9919877E-003 -9.7632685E-003  
-1.4584117E-002 -6.2691112E-003 -1.0457167E-002  
-1.4777938E-002 -3.3228316E-003 -1.1001562E-002  
-1.5429889E-002 -1.5036909E-004 -1.1349589E-002  
-1.6548295E-002 3.2328841E-003 -1.1357245E-002  
-1.8196782E-002 5.8597595E-003 -1.1069008E-002  
-1.9981486E-002 8.0169439E-003 -1.0564784E-002  
-2.1887300E-002 9.7044411E-003 -9.9313713E-003  
-2.3916003E-002 1.0928960E-002 -9.1950753E-003  
-2.6071265E-002 1.1694644E-002 -8.3875549E-003  
-2.8353142E-002 1.2000540E-002 -7.4930834E-003  
-3.0777615E-002 1.1867852E-002 -6.5588028E-003  
-3.3354059E-002 1.1289277E-002 -5.5751379E-003  
-3.6047675E-002 1.0251747E-002 -4.4711204E-003  
-3.8043223E-002 9.0330178E-003 -3.6976629E-003  
-3.9706516E-002 7.5960920E-003 -3.0575587E-003  
-4.1087150E-002 5.9928632E-003 -2.6004197E-003  
-4.2139353E-002 4.1843473E-003 -2.2765922E-003  
-4.2905979E-002 2.2033481E-003 -2.1287840E-003  
-4.3398219E-002 3.6569616E-005 -2.1546165E-003  
-4.3619987E-002 -2.3229635E-003 -2.3648801E-003  
-4.3432513E-002 -4.8929724E-003 -2.6603310E-003  
-4.2849202E-002 -7.6238170E-003 -3.0403784E-003  
-4.1803077E-002 -9.7370599E-003 -3.6495055E-003  
-4.0565851E-002 -1.1494134E-002 -4.2691953E-003  
-3.9167866E-002 -1.2877617E-002 -4.9344568E-003  
-3.7691343E-002 -1.3932639E-002 -5.7139384E-003  
-3.6101591E-002 -1.4642594E-002 -6.5766635E-003  
-3.4418429E-002 -1.5025869E-002 -7.5456448E-003  
-3.2653568E-002 -1.5110841E-002 -8.6483674E-003  
-3.0776251E-002 -1.4853366E-002 -9.8518576E-003  
-2.8775170E-002 -1.4223368E-002 -1.1100344E-002  
-2.5665595E-002 -1.0979905E-002 -1.3870010E-002  
-2.3455933E-002 -7.4521609E-003 -1.5344635E-002  
-2.2483303E-002 -4.2938780E-003 -1.5722384E-002  
-2.2567282E-002 -1.7187432E-003 -1.5921533E-002  
-2.3635998E-002 4.1616089E-004 -1.6007002E-002  
-2.5726889E-002 2.2931543E-003 -1.6392483E-002

-2.9110393E-002 4.1669386E-003 -1.6705085E-002  
-3.3630366E-002 5.2653835E-003 -1.4653404E-002  
-3.8339682E-002 5.0911570E-003 -1.1923620E-002  
-3.8957610E-002 3.1484777E-004 -1.4082690E-002  
-3.8731787E-002 -4.6437795E-003 -1.5454345E-002  
-3.7450260E-002 -8.0753688E-003 -1.5287173E-002  
-3.6601032E-002 -9.8233718E-003 -1.5087355E-002  
-3.6025854E-002 -1.0411501E-002 -1.5161992E-002  
-3.5684078E-002 -9.9367095E-003 -1.5492116E-002  
-3.5396894E-002 -8.4029778E-003 -1.5968392E-002  
-3.5254572E-002 -5.6210249E-003 -1.6910229E-002  
8.9661641E-003 -2.9817631E-003 1.8236741E-002  
1.2616769E-002 -4.8225367E-003 2.0689376E-002  
1.6564926E-002 -6.3726392E-003 2.2489770E-002  
2.0438761E-002 -7.6988645E-003 2.3850965E-002  
2.4134897E-002 -8.8139975E-003 2.5284245E-002  
2.7794540E-002 -9.7525121E-003 2.6233116E-002  
3.1361324E-002 -1.0431585E-002 2.7037102E-002  
3.4902899E-002 -1.1038246E-002 2.7489835E-002  
3.8384402E-002 -1.1347387E-002 2.7636914E-002  
4.1751768E-002 -1.1500167E-002 2.7458581E-002  
  
4.0668090E-002 -1.0710575E-002 2.6795190E-002  
2.5153358E-002 -2.8666574E-002 -1.2791232E-002  
2.6613569E-002 -2.9928736E-002 -1.4328138E-002  
2.8621963E-002 -3.1161567E-002 -1.5128142E-002  
3.0747666E-002 -3.2202423E-002 -1.5223311E-002  
3.2865653E-002 -3.3015184E-002 -1.5088653E-002  
3.5054517E-002 -3.3650796E-002 -1.4427104E-002  
3.7440862E-002 -3.4138927E-002 -1.3691041E-002  
4.0005225E-002 -3.4485596E-002 -1.2480766E-002  
4.2592006E-002 -3.4663447E-002 -1.0612399E-002  
4.5291938E-002 -3.4551167E-002 -8.4243203E-003  
4.7742186E-002 -3.4658047E-002 -5.5503200E-003  
4.9558855E-002 -3.4719290E-002 -2.5975787E-003  
5.1083665E-002 -3.4430620E-002 2.5444241E-004  
5.2156564E-002 -3.3874541E-002 2.9409302E-003  
5.2989128E-002 -3.2867523E-002 6.2961323E-003  
5.3582372E-002 -3.1693139E-002 9.2755783E-003  
5.3637942E-002 -3.0265130E-002 1.1748328E-002  
5.3340499E-002 -2.8519001E-002 1.4542754E-002  
5.2533002E-002 -2.6479280E-002 1.7241279E-002  
5.1153920E-002 -2.3922804E-002 2.0314133E-002  
4.9177991E-002 -2.1416172E-002 2.2577347E-002  
4.6599331E-002 -1.9177231E-002 2.4044917E-002  
4.3571960E-002 -1.7035507E-002 2.4887081E-002  
4.0181046E-002 -1.4810230E-002 2.5091560E-002  
3.6091752E-002 -1.3137120E-002 2.4419473E-002  
3.1511241E-002 -1.1594097E-002 2.3038824E-002  
2.6473953E-002 -9.9031555E-003 2.1124131E-002  
2.0880484E-002 -8.4785989E-003 1.8310415E-002  
1.9050823E-002 -7.9365554E-003 1.6801416E-002  
1.7612202E-002 -7.9413254E-003 1.5091690E-002  
1.6585521E-002 -8.3707358E-003 1.3227763E-002  
1.6026874E-002 -9.1981717E-003 1.1321707E-002  
1.5919076E-002 -1.0454606E-002 9.3047218E-003  
1.6163467E-002 -1.2049630E-002 7.1642032E-003  
1.6608940E-002 -1.3934626E-002 4.7888198E-003  
1.7260242E-002 -1.6198355E-002 2.1422314E-003  
1.8536782E-002 -1.8860232E-002 -3.7639992E-004

1.9727447E-002 -2.0414264E-002 -8.7546753E-004  
2.1096534E-002 -2.1919243E-002 -1.3605920E-003  
2.2299478E-002 -2.3287403E-002 -2.1378443E-003  
2.3183934E-002 -2.4507242E-002 -3.2621537E-003  
2.3912380E-002 -2.5604235E-002 -4.6238717E-003  
2.4394950E-002 -2.6557703E-002 -6.3262516E-003  
2.4571877E-002 -2.7374809E-002 -8.3734619E-003  
2.4600919E-002 -2.7988949E-002 -1.0631706E-002  
2.0431694E-002 -2.9271295E-002 -1.7841663E-002  
2.2462463E-002 -3.0562103E-002 -1.8650612E-002  
2.4663969E-002 -3.1759042E-002 -1.9105793E-002  
2.7017639E-002 -3.2825837E-002 -1.9182999E-002  
2.9411073E-002 -3.3631856E-002 -1.8892926E-002  
3.1899319E-002 -3.4465313E-002 -1.8416254E-002  
3.4463005E-002 -3.5119780E-002 -1.7670878E-002  
3.7156207E-002 -3.5751343E-002 -1.6764464E-002  
3.9918116E-002 -3.6188237E-002 -1.5492503E-002  
4.2715425E-002 -3.6327000E-002 -1.3773492E-002  
4.4724923E-002 -3.6483136E-002 -1.2384995E-002  
4.6533616E-002 -3.6504448E-002 -1.0851766E-002  
4.8155654E-002 -3.6386564E-002 -9.1336554E-003  
4.9646998E-002 -3.6288412E-002 -7.3863038E-003  
5.1015502E-002 -3.6195419E-002 -5.5842430E-003  
5.2222067E-002 -3.6005630E-002 -3.6033916E-003  
5.3313933E-002 -3.5855246E-002 -1.5297337E-003  
5.4091050E-002 -3.5404637E-002 7.6131203E-004  
5.4701834E-002 -3.4912480E-002 3.1360471E-003  
5.5265148E-002 -3.4352893E-002 5.3662971E-003  
5.5741788E-002 -3.3739822E-002 7.5148577E-003  
5.6017092E-002 -3.2953760E-002 9.5960025E-003  
5.6211243E-002 -3.2080074E-002 1.1618023E-002  
5.6284028E-002 -3.1122788E-002 1.3586572E-002  
5.6066638E-002 -2.9929776E-002 1.5459349E-002  
5.5722060E-002 -2.8630055E-002 1.7264243E-002  
5.5221119E-002 -2.7155190E-002 1.8986041E-002  
5.4543606E-002 -2.5545750E-002 2.0603217E-002  
5.3508899E-002 -2.3871034E-002 2.2329192E-002  
5.2219346E-002 -2.2133531E-002 2.3857103E-002  
5.0689122E-002 -2.0398292E-002 2.5051691E-002  
4.8918397E-002 -1.8774870E-002 2.5984632E-002  
4.7097454E-002 -1.7156526E-002 2.6959302E-002  
4.5002678E-002 -1.5566799E-002 2.7487813E-002  
4.2822176E-002 -1.3997847E-002 2.8186002E-002  
4.0614914E-002 -1.2553695E-002 2.9197122E-002  
3.7875330E-002 -1.0898784E-002 2.8702654E-002  
1.7718818E-002 2.6311609E-002 7.1466984E-003  
1.8850563E-002 2.7910273E-002 6.1036399E-003  
2.0664533E-002 2.9495516E-002 5.3393881E-003  
2.2639992E-002 3.0736418E-002 4.6538391E-003  
2.4842911E-002 3.1754409E-002 4.0216933E-003  
2.7213648E-002 3.2494546E-002 3.5072483E-003  
2.9789393E-002 3.3085760E-002 2.9416571E-003  
3.2655693E-002 3.3595667E-002 2.1776116E-003  
3.5798571E-002 3.3817986E-002 1.4399206E-003  
3.9192247E-002 3.3693442E-002 1.0514932E-003  
4.2204201E-002 3.3408435E-002 8.2360367E-004  
4.4952316E-002 3.2718264E-002 9.2221013E-004  
4.7571472E-002 3.1778205E-002 1.1554728E-003  
5.0061141E-002 3.0378036E-002 1.5788840E-003  
5.2313542E-002 2.8655766E-002 2.2981441E-003

5.4326743E-002 2.6643907E-002 3.3753448E-003  
5.6227557E-002 2.4288106E-002 4.6501319E-003  
5.7855883E-002 2.1637600E-002 6.2840077E-003  
5.9214517E-002 1.8598072E-002 8.2209235E-003  
6.0084898E-002 1.4247306E-002 1.1314259E-002  
5.9743323E-002 1.0429871E-002 1.4333023E-002  
5.8853578E-002 6.8527348E-003 1.6947825E-002  
5.7138414E-002 3.7627565E-003 1.9350382E-002  
5.4800524E-002 1.1141342E-003 2.1502729E-002  
5.2003444E-002 -1.2801355E-003 2.3392631E-002  
4.8543015E-002 -3.3090101E-003 2.4908667E-002  
4.4454111E-002 -5.0706398E-003 2.6074393E-002  
3.9638471E-002 -6.0064262E-003 2.7063588E-002  
3.4789341E-002 -5.4346037E-003 2.5796230E-002  
3.0475309E-002 -4.8513159E-003 2.4454733E-002  
2.6742290E-002 -3.8376482E-003 2.3139645E-002  
2.3530219E-002 -2.7740630E-003 2.1779998E-002  
2.0862081E-002 -1.3925952E-003 2.0400429E-002  
1.8827229E-002 7.0864532E-004 1.9135332E-002  
1.7835983E-002 3.6487286E-003 1.8064706E-002  
1.7065743E-002 6.4975930E-003 1.6776561E-002  
1.6226194E-002 9.4840029E-003 1.5168109E-002  
1.6903992E-002 1.1612218E-002 1.5023237E-002  
1.8081371E-002 1.3845437E-002 1.5043146E-002  
1.8880753E-002 1.5967546E-002 1.4700425E-002  
1.9403089E-002 1.7970986E-002 1.4058611E-002  
1.9537398E-002 1.9817457E-002 1.3120392E-002  
1.9321009E-002 2.1555436E-002 1.1967946E-002  
1.8775167E-002 2.3181258E-002 1.0467200E-002  
1.7885196E-002 2.4665733E-002 8.5730321E-003  
1.2005658E-002 2.6052373E-002 6.9103228E-003  
1.3252099E-002 2.7902580E-002 6.4417054E-003  
1.4737852E-002 2.9651155E-002 5.8926919E-003  
1.6560378E-002 3.1128284E-002 5.3176140E-003  
1.8605760E-002 3.2483952E-002 4.6738702E-003  
2.0960085E-002 3.3638918E-002 3.9655536E-003  
2.3630727E-002 3.4616441E-002 3.2332482E-003  
2.6571175E-002 3.5315658E-002 2.4398104E-003  
2.9748368E-002 3.6034674E-002 1.5511333E-003  
3.3196041E-002 3.6463210E-002 6.5588089E-004  
3.5922701E-002 3.6632944E-002 3.5204387E-005  
3.8485939E-002 3.6707318E-002 -3.8005158E-004  
4.1015248E-002 3.6536914E-002 -8.3539295E-004  
4.3377276E-002 3.6054455E-002 -9.7487460E-004  
4.5569290E-002 3.5450203E-002 -8.3838392E-004  
4.7648837E-002 3.4522157E-002 -6.0614137E-004  
4.9740875E-002 3.3630002E-002 -2.9504631E-004  
5.1630399E-002 3.2479601E-002 2.9489460E-004  
5.3489841E-002 3.1191045E-002 1.0075416E-003  
5.5900029E-002 2.9230910E-002 1.8866585E-003  
5.7829339E-002 2.6986051E-002 2.9861582E-003  
5.9536108E-002 2.4728270E-002 4.2499078E-003  
6.0839069E-002 2.2230289E-002 5.6417959E-003  
6.1963134E-002 1.9533656E-002 7.1777738E-003  
6.2616549E-002 1.6766835E-002 8.9450660E-003  
6.2770734E-002 1.3897883E-002 1.0976239E-002  
6.2838436E-002 1.0815963E-002 1.3097030E-002  
6.2404829E-002 7.5044478E-003 1.5389986E-002  
6.1115657E-002 4.6675050E-003 1.8370915E-002  
5.9004500E-002 2.1414930E-003 2.0703182E-002

5.6997575E-002 -2.5311582E-004 2.2888282E-002  
5.4680965E-002 -2.4983066E-003 2.4817712E-002  
5.1958760E-002 -4.5155101E-003 2.6329319E-002  
4.8763782E-002 -6.2851750E-003 2.7298109E-002  
4.5337161E-002 -7.9338974E-003 2.7798830E-002  
4.1887021E-002 -9.5576085E-003 2.8714414E-002  
3.7875330E-002 -1.0898784E-002 2.8702654E-002  
2.2756827E-002 -9.1340905E-003 -1.9789896E-002  
2.3455379E-002 -8.4049157E-003 -2.0772581E-002  
2.4238676E-002 -7.4613595E-003 -2.1623450E-002  
2.5125920E-002 -6.4010872E-003 -2.2231935E-002  
2.6107308E-002 -5.3065632E-003 -2.2645331E-002  
2.7102762E-002 -4.2118429E-003 -2.3090759E-002  
2.8168294E-002 -3.0299231E-003 -2.3361883E-002  
2.9251593E-002 -1.8013843E-003 -2.3622917E-002  
3.0317050E-002 -4.9257582E-004 -2.4031495E-002  
3.1490647E-002 8.8248825E-004 -2.4333861E-002  
3.1997740E-002 1.5966311E-003 -2.4721671E-002  
3.2536955E-002 2.5149650E-003 -2.5056382E-002  
3.3052738E-002 3.7563274E-003 -2.5497604E-002  
3.3668871E-002 5.1983692E-003 -2.5648362E-002  
3.4425364E-002 6.4402449E-003 -2.5482431E-002  
3.5131677E-002 8.4043243E-003 -2.5497985E-002  
3.5932375E-002 1.0647895E-002 -2.5295618E-002  
3.6668045E-002 1.2581709E-002 -2.5090898E-002  
3.7636975E-002 1.5355374E-002 -2.4517914E-002  
3.8426194E-002 1.8030255E-002 -2.3190955E-002  
3.9141630E-002 2.0546381E-002 -2.1593870E-002  
3.9679920E-002 2.2776860E-002 -1.9856188E-002  
4.0035280E-002 2.4729145E-002 -1.7819097E-002  
4.0292304E-002 2.6278844E-002 -1.5527972E-002  
4.0354035E-002 2.7672199E-002 -1.2956563E-002  
4.0221683E-002 2.8688542E-002 -1.0142083E-002  
3.9933771E-002 2.9168742E-002 -7.0856434E-003  
3.9425661E-002 2.9210877E-002 -3.8642899E-003  
3.8516350E-002 2.8204142E-002 8.9223990E-004  
3.7222565E-002 2.6494308E-002 4.8807946E-003  
3.5602359E-002 2.4381135E-002 7.9030576E-003  
3.3717084E-002 2.2119677E-002 1.0177781E-002  
3.1563282E-002 1.9753024E-002 1.1799043E-002  
2.9065891E-002 1.7248819E-002 1.2820694E-002  
2.6256835E-002 1.4441504E-002 1.3079163E-002  
2.3072566E-002 1.1389582E-002 1.2429970E-002  
1.9666433E-002 8.1284148E-003 1.0999343E-002  
1.8590917E-002 5.4612138E-003 9.9494300E-003  
1.7757991E-002 2.9323990E-003 8.6507884E-003  
1.7442283E-002 6.0464817E-004 7.1290345E-003  
1.7241269E-002 -1.4672193E-003 5.6135315E-003  
1.7017249E-002 -3.2847904E-003 3.9302010E-003  
1.7030602E-002 -4.9819396E-003 1.9985864E-003  
1.7033464E-002 -6.5869384E-003 -1.8412043E-004  
1.7743945E-002 -7.9983678E-003 -2.3818262E-003  
1.8854601E-002 -8.6892065E-003 -4.0712527E-003  
1.9278868E-002 -7.9150151E-003 -5.6817168E-003  
1.9863558E-002 -7.3006773E-003 -7.2359580E-003  
2.0476670E-002 -6.8382933E-003 -8.8481166E-003  
2.0886181E-002 -6.7086520E-003 -1.0543956E-002  
2.1200320E-002 -6.8339518E-003 -1.2305631E-002  
2.1427812E-002 -7.2704865E-003 -1.4142569E-002  
2.1588786E-002 -8.0407737E-003 -1.6078269E-002

2.1822739E-002 -8.9946342E-003 -1.8170326E-002  
2.1490822E-002 -1.4593865E-002 -2.2356190E-002  
2.2355884E-002 -1.3359321E-002 -2.3179992E-002  
2.3183477E-002 -1.1991374E-002 -2.3902105E-002  
2.4005480E-002 -1.0513269E-002 -2.4515559E-002  
2.4879983E-002 -8.9851773E-003 -2.5046606E-002  
2.5786822E-002 -7.4543176E-003 -2.5458936E-002  
2.6759518E-002 -5.8836715E-003 -2.5807074E-002  
2.7771299E-002 -4.3161401E-003 -2.6190422E-002  
2.8870955E-002 -2.6870493E-003 -2.6505790E-002  
3.0018021E-002 -1.0753308E-003 -2.6912354E-002  
3.0915789E-002 2.6720067E-004 -2.7169036E-002  
3.1787298E-002 1.6026819E-003 -2.7478697E-002  
3.2638252E-002 2.9760249E-003 -2.7575046E-002  
3.3439095E-002 4.3521386E-003 -2.7742784E-002  
3.4118633E-002 5.7508061E-003 -2.7649242E-002  
3.4894322E-002 7.1582559E-003 -2.7771169E-002  
3.5566761E-002 8.6203106E-003 -2.7757515E-002  
3.5956465E-002 1.0008535E-002 -2.7431093E-002  
3.6724569E-002 1.1541147E-002 -2.7447264E-002  
4.1520140E-002 1.5096094E-002 -2.7657265E-002  
4.0919801E-002 1.8564836E-002 -2.5459480E-002  
4.1021086E-002 2.1893618E-002 -2.2934835E-002  
4.1386267E-002 2.4834674E-002 -2.0289172E-002  
4.1079001E-002 2.7649754E-002 -1.6890479E-002  
4.1093462E-002 2.9530006E-002 -1.3802997E-002  
4.0684227E-002 3.0724239E-002 -1.0399091E-002  
3.9950824E-002 3.1554604E-002 -6.5573224E-003  
3.9383626E-002 3.2046402E-002 -2.5491741E-003  
3.9198535E-002 3.1091409E-002 2.8194005E-003  
3.7649575E-002 2.8661450E-002 6.8754806E-003  
3.6096552E-002 2.6337417E-002 1.0143337E-002  
3.4312896E-002 2.3826390E-002 1.2870741E-002  
3.2225384E-002 2.1153252E-002 1.4946399E-002  
2.9854518E-002 1.8155106E-002 1.6389531E-002  
2.7159993E-002 1.4862499E-002 1.6956129E-002  
2.4068465E-002 1.1302543E-002 1.6506052E-002  
2.0645231E-002 7.5781500E-003 1.5626644E-002  
1.4096783E-002 9.5921313E-004 -6.6643742E-003  
1.3356110E-002 1.5489352E-003 -6.6243442E-003  
1.2476213E-002 1.9576765E-003 -6.4974910E-003  
1.1616938E-002 2.3120328E-003 -6.3700682E-003  
1.0791370E-002 2.8026577E-003 -6.0991769E-003  
9.6996252E-003 2.5225340E-003 -6.5694214E-003  
8.7862476E-003 1.9854171E-003 -6.2649614E-003  
7.6783898E-003 2.2090581E-003 -6.8838547E-003  
6.5162722E-003 1.9678747E-003 -7.1619147E-003  
5.5747938E-003 1.4951462E-003 -7.1226527E-003  
3.9577787E-003 1.3166772E-003 -7.6388424E-003  
2.7614581E-003 8.6515154E-004 -7.8551698E-003  
1.8591980E-003 1.7755991E-004 -7.9021798E-003  
1.0481862E-003 -5.9634936E-004 -8.0705489E-003  
3.2478896E-004 -1.4434266E-003 -8.2045063E-003  
-2.6893863E-004 -2.4519996E-003 -8.4415424E-003  
-6.1445681E-004 -3.5797485E-003 -8.6350785E-003  
-8.0215641E-004 -4.8652917E-003 -8.8283941E-003  
-8.3501474E-004 -6.2786432E-003 -9.0885254E-003  
2.0905726E-004 -7.0081914E-003 -9.7153344E-003  
1.3383216E-003 -7.5109539E-003 -1.0194503E-002  
2.4491415E-003 -7.7841730E-003 -1.0543293E-002

3.4871228E-003 -7.9731906E-003 -1.0912457E-002  
4.5211947E-003 -7.9169139E-003 -1.0976175E-002  
5.5578490E-003 -7.7822456E-003 -1.1055009E-002  
6.5745137E-003 -7.4946924E-003 -1.0965465E-002  
7.6142260E-003 -7.0417694E-003 -1.0792958E-002  
8.6422417E-003 -6.3484464E-003 -1.0620943E-002  
9.7343910E-003 -5.6352360E-003 -1.0324694E-002  
1.0748684E-002 -4.9224931E-003 -9.9354338E-003  
1.1622564E-002 -4.1671585E-003 -9.4876818E-003  
1.2340373E-002 -3.4028450E-003 -8.9885318E-003  
1.2938168E-002 -2.5995434E-003 -8.5739977E-003  
1.3410528E-002 -1.7348760E-003 -8.1226075E-003  
1.3866518E-002 -8.1347756E-004 -7.7634537E-003  
1.4192021E-002 1.8053927E-004 -7.4612464E-003  
-2.4557009E-002 1.5450943E-002 1.8930107E-002  
-2.7331528E-002 1.8837262E-002 1.7436906E-002  
-2.9504789E-002 2.1049268E-002 1.5662092E-002  
-3.1947146E-002 2.3201394E-002 1.2465287E-002  
-3.2530675E-002 2.3302021E-002 1.0923092E-002  
-3.2890034E-002 2.2944762E-002 9.3014060E-003  
-3.3132641E-002 2.1905108E-002 7.4005922E-003  
-3.5298049E-002 -1.2535502E-002 1.7094414E-002  
-3.8429735E-002 -1.2816828E-002 1.6247885E-002  
-4.0951583E-002 -1.3124745E-002 1.5630302E-002  
-4.2757685E-002 -1.3090526E-002 1.4605368E-002  
-4.4426345E-002 -1.2305010E-002 1.2092431E-002  
-4.4628339E-002 -1.1730278E-002 1.0657541E-002  
-4.4333215E-002 -1.0923382E-002 8.9473698E-003  
-1.9494848E-002 -2.1063692E-002 1.8830021E-003  
-2.0119337E-002 -2.2306971E-002 1.7614599E-004  
-2.0758198E-002 -2.3235078E-002 -1.3456862E-003  
-2.1452933E-002 -2.3638749E-002 -2.6726195E-003  
-2.3063465E-002 -2.2892541E-002 -4.8352028E-003  
-2.3983431E-002 -2.1853901E-002 -5.7587204E-003  
-2.5009250E-002 -2.0287011E-002 -6.5717083E-003  
-3.0571995E-002 1.1486240E-002 4.2719501E-003  
-3.1541868E-002 1.3164911E-002 4.1472995E-003  
-3.2470162E-002 1.4162189E-002 3.5590869E-003  
-3.3147352E-002 1.4357897E-002 2.8017747E-003  
-3.4228341E-002 1.4034041E-002 1.3125528E-003  
-3.4676033E-002 1.3416461E-002 4.0853531E-004  
-3.5111801E-002 1.2454413E-002 -7.1177703E-004  
-3.7073588E-002 -1.1652602E-002 6.9324555E-003  
-4.1415410E-002 -1.0445603E-002 8.1481384E-003  
-4.1692447E-002 -8.6073492E-003 5.7110136E-003  
-4.3317555E-002 -8.1806749E-003 4.3730192E-003  
-4.3643627E-002 -7.9068594E-003 3.5291369E-003  
-4.3583400E-002 -7.4218747E-003 2.5567830E-003  
-4.3362657E-002 -6.8525774E-003 1.3845866E-003  
-2.1828041E-002 -1.4602264E-002 -2.2930908E-003  
-2.1698555E-002 -1.9039142E-002 -4.4091815E-003  
-2.6354213E-002 -1.5224249E-002 -7.8026460E-003  
-2.7583795E-002 -1.5076728E-002 -9.4743077E-003  
-2.8210106E-002 -1.4640347E-002 -1.0039016E-002  
-2.8960087E-002 -1.3974120E-002 -1.0523139E-002  
-2.9850745E-002 -1.3084875E-002 -1.1001107E-002  
1.0584948E-002 1.7633845E-002 -4.8634894E-004  
1.1876183E-002 1.4989552E-002 1.4602545E-003  
1.3119461E-002 8.3313351E-003 4.6898958E-003  
7.5250049E-003 1.3527558E-002 -1.4158053E-003



5.6377761E-003 1.3107408E-002 -1.7238967E-003  
3.7630445E-003 1.3032390E-002 -1.8137965E-003  
1.6282956E-003 1.2817952E-002 -9.3281961E-004  
-8.7570563E-004 1.2357632E-002 5.4839079E-004  
-3.6338016E-003 1.1601387E-002 2.2976263E-003  
-6.4285837E-003 1.0783607E-002 4.4089217E-003  
-7.2484586E-003 1.0137268E-002 5.2836911E-003  
-8.4052624E-003 9.9504958E-003 6.0650944E-003  
-9.6552071E-003 9.6341129E-003 6.9551632E-003  
-1.1102143E-002 9.3550065E-003 7.7970787E-003  
-1.2643496E-002 8.8324906E-003 8.7733124E-003  
-1.4376105E-002 8.3655667E-003 9.7375501E-003  
-1.6199503E-002 7.6069465E-003 1.0733400E-002  
-1.8183925E-002 6.8062517E-003 1.1872784E-002  
-2.0100593E-002 5.6488777E-003 1.2990711E-002  
-2.2032272E-002 4.3172367E-003 1.3749998E-002  
-2.3792446E-002 2.8734266E-003 1.4370044E-002  
-2.5098370E-002 1.2037561E-003 1.4827856E-002  
-2.6320197E-002 -3.7614726E-004 1.5107850E-002  
-2.7283923E-002 -1.8542051E-003 1.5161449E-002  
-2.7949729E-002 -3.5465375E-003 1.4999779E-002  
-2.8415300E-002 -5.2560402E-003 1.4668358E-002  
-2.8687201E-002 -6.9185430E-003 1.4187687E-002  
-2.8903732E-002 -8.7244005E-003 1.3554415E-002  
-2.8683330E-002 -1.0179277E-002 1.2758665E-002  
-2.8206896E-002 -1.1452969E-002 1.2049946E-002  
-2.7458442E-002 -1.2442946E-002 1.1136957E-002  
-2.6520424E-002 -1.3177630E-002 1.0260388E-002  
-2.5481551E-002 -1.3770873E-002 9.2457284E-003  
-2.4437017E-002 -1.4270200E-002 8.0466390E-003  
-2.3142103E-002 -1.4554356E-002 6.8036365E-003  
-2.1710533E-002 -1.4546152E-002 5.5157407E-003  
-2.0084696E-002 -1.4191317E-002 4.2624499E-003  
-1.7986785E-002 -1.0561710E-002 2.4516332E-003  
-1.6621795E-002 -7.1993701E-003 1.6289021E-003  
-1.5272779E-002 -4.4226174E-003 -6.6452244E-004  
-1.5194190E-002 -1.6106594E-003 -1.2841592E-003  
-1.6019285E-002 9.0752156E-004 -1.3625601E-003  
-1.7443025E-002 3.2131513E-003 -1.3650613E-003  
-1.9886077E-002 5.4690381E-003 -1.7757640E-003  
-2.3736948E-002 7.3136366E-003 -3.1899326E-004  
-2.6654365E-002 7.1789451E-003 2.8974329E-003  
-3.2063636E-002 4.5321579E-003 4.4946016E-003  
-3.4301798E-002 1.6803204E-003 5.3290350E-003  
-3.4880081E-002 -2.2197605E-003 3.8965479E-003  
-3.5469038E-002 -5.2271742E-003 3.8285715E-003  
-3.5229037E-002 -6.8342929E-003 3.1040223E-003  
-3.4704432E-002 -8.1448044E-003 1.8315776E-003  
-3.3184125E-002 -9.0294778E-003 -1.2024170E-004  
-2.9547906E-002 -9.2076223E-003 -2.7711789E-003  
-2.3829426E-002 -7.2520254E-003 -4.0746617E-003  
-2.6782681E-002 -3.7091190E-003 -6.5486123E-003  
-2.8573428E-002 3.4865274E-003 -4.2709895E-003  
-2.9062785E-002 5.4080013E-003 -1.5101232E-003  
-3.0817779E-002 4.2867467E-003 -2.5736298E-003  
-3.2600775E-002 3.1335074E-003 -3.9135866E-003  
-3.5012372E-002 -7.9805687E-004 -5.5331215E-003  
-3.9965295E-002 -1.2417149E-002 -8.4708615E-003  
-3.9757414E-002 -4.9554431E-003 -1.2194957E-002  
-6.0115812E-003 2.2544053E-002 1.4876133E-002

-8.5155932E-003 2.1113468E-002 1.5085103E-002  
-1.0730813E-002 1.9656059E-002 1.5621762E-002  
-1.2764603E-002 1.8194671E-002 1.6233857E-002  
-1.4671160E-002 1.6781695E-002 1.6728065E-002  
-1.6459913E-002 1.5475380E-002 1.7190623E-002  
-1.8127773E-002 1.4267478E-002 1.7564031E-002  
-1.9627774E-002 1.3117198E-002 1.7832616E-002  
-2.0880036E-002 1.2019673E-002 1.8221586E-002  
-2.2022333E-002 1.1010350E-002 1.8491811E-002  
-2.4078318E-002 8.1653725E-003 1.8928873E-002  
-2.5942022E-002 5.4204066E-003 1.9140720E-002  
-2.7442047E-002 2.6968785E-003 1.9431894E-002  
-2.8761805E-002 8.4664087E-005 1.9419485E-002  
-2.9849568E-002 -2.4193620E-003 1.9271008E-002  
-3.0634658E-002 -4.8654039E-003 1.9091370E-002  
-3.1188879E-002 -7.2065443E-003 1.8700071E-002  
-3.1661803E-002 -9.3860636E-003 1.7829065E-002  
-3.1851751E-002 -1.1568076E-002 1.6863367E-002  
-3.0962724E-002 -1.3817926E-002 1.5310672E-002  
-2.9946529E-002 -1.5780371E-002 1.3737130E-002  
-2.8729621E-002 -1.7383818E-002 1.2296848E-002  
-2.7436905E-002 -1.8572889E-002 1.0778785E-002  
-2.5946806E-002 -1.9444865E-002 9.4165238E-003  
-2.4304322E-002 -2.0003492E-002 8.0992457E-003  
-2.2545266E-002 -2.0185746E-002 6.7651953E-003  
-2.0733703E-002 -1.9930773E-002 5.3024471E-003  
-1.8779845E-002 -1.9266065E-002 3.9218928E-003  
-1.5837682E-002 -1.7189188E-002 2.3284985E-003  
-1.3638209E-002 -1.4767236E-002 8.8162981E-004  
-1.2187506E-002 -1.2126075E-002 -3.2820762E-004  
-1.1342923E-002 -9.2744046E-003 -1.2105605E-003  
-1.1044149E-002 -6.2012859E-003 -1.7703180E-003  
-1.1440157E-002 -2.9065922E-003 -2.1289959E-003  
-1.2484592E-002 6.0517441E-004 -2.2976593E-003  
-1.4224080E-002 4.2990602E-003 -2.2524992E-003  
-1.6631209E-002 8.1693096E-003 -2.0070161E-003  
-2.0097641E-002 9.4082724E-003 -1.5053198E-004  
-2.3314748E-002 1.0078959E-002 1.3198056E-003  
-2.6129278E-002 1.0279792E-002 2.7565466E-003  
-2.8634885E-002 9.9220704E-003 3.8464755E-003  
-3.0707749E-002 9.1125048E-003 5.0192248E-003  
-3.2506032E-002 7.7682994E-003 5.8376098E-003  
-3.3937025E-002 5.9927489E-003 6.7877366E-003  
-3.5024489E-002 3.6872309E-003 7.4962340E-003  
-3.5717052E-002 8.6127667E-004 7.8732154E-003  
-3.5904800E-002 -1.5114968E-003 7.5269705E-003  
-3.5908862E-002 -3.7843550E-003 7.0368085E-003  
-3.5631708E-002 -5.5557983E-003 6.3212849E-003  
-3.5196201E-002 -7.1589340E-003 5.7338624E-003  
-3.4777543E-002 -8.3692121E-003 5.0228363E-003  
-3.3957714E-002 -9.6193717E-003 4.3562576E-003  
-3.2652116E-002 -1.0379252E-002 3.9265103E-003  
-3.1880754E-002 -1.1155764E-002 2.5153888E-003  
-3.0764233E-002 -1.1609862E-002 1.3654445E-003  
-2.9496375E-002 -1.1943739E-002 1.4056590E-004  
-2.8311401E-002 -1.1958933E-002 -1.0660862E-003  
-2.6788316E-002 -1.1764503E-002 -1.7369300E-003  
-2.5961061E-002 -1.1229985E-002 -2.7762260E-003  
-2.5033081E-002 -1.0486031E-002 -3.6970092E-003  
-2.4131195E-002 -9.4409842E-003 -4.4502288E-003

-2.3270350E-002 -8.1554447E-003 -5.1032038E-003  
-2.2568172E-002 -6.5666763E-003 -5.7217608E-003  
-2.2002143E-002 -4.7002805E-003 -6.2168758E-003  
-2.5747678E-002 -1.0607675E-003 -7.2735023E-003  
-2.7599357E-002 1.7356261E-003 -6.5736991E-003  
-2.8410739E-002 3.8902188E-003 -5.5983268E-003  
-2.8778470E-002 5.3641691E-003 -3.3067575E-003  
-2.9944854E-002 5.5779468E-003 -2.8715290E-003  
-3.1232266E-002 4.5547527E-003 -4.1093381E-003  
-2.4953231E-002 -4.2030305E-003 -1.7814297E-003  
-3.6864083E-002 -2.4734251E-003 -1.1746502E-002  
1.6393352E-002 1.3586096E-002 -3.3833064E-003  
1.5505133E-002 1.2835696E-002 -5.0123417E-003  
1.4524837E-002 1.2008866E-002 -6.5457601E-003  
1.3239230E-002 1.1259650E-002 -7.7226132E-003  
1.1811124E-002 1.0684653E-002 -8.7333160E-003  
1.0433555E-002 1.0388032E-002 -9.8080206E-003  
8.9650429E-003 1.0333895E-002 -1.0834076E-002  
7.4784283E-003 1.0474626E-002 -1.1884793E-002  
5.9729581E-003 1.0850801E-002 -1.2950144E-002  
4.3153806E-003 1.1403395E-002 -1.3808524E-002  
2.9018294E-003 1.2152659E-002 -1.4337564E-002  
1.5569567E-003 1.3037779E-002 -1.4770106E-002  
1.4804694E-004 1.3978824E-002 -1.4920223E-002  
-1.2110533E-003 1.5107232E-002 -1.4918426E-002  
-2.5732029E-003 1.6364726E-002 -1.4698024E-002  
-3.8855871E-003 1.7808618E-002 -1.4309147E-002  
-5.2194587E-003 1.9322421E-002 -1.3621254E-002  
-6.5368707E-003 2.0957418E-002 -1.2691583E-002  
-7.8542528E-003 2.2718646E-002 -1.1532217E-002  
-9.0006916E-003 2.4289599E-002 -9.8307892E-003  
-1.0172413E-002 2.5718203E-002 -8.2698930E-003  
-1.1439673E-002 2.6846885E-002 -6.6208795E-003  
-1.2756972E-002 2.7740494E-002 -4.9601651E-003  
-1.4067104E-002 2.8458133E-002 -3.2668653E-003  
-1.5391636E-002 2.9051189E-002 -1.5370797E-003  
-1.6818801E-002 2.9334451E-002 1.6461054E-004  
-1.8272231E-002 2.9429004E-002 1.9262021E-003  
-1.9767114E-002 2.9338804E-002 3.7277261E-003  
-2.2518493E-002 2.8609976E-002 6.2237031E-003  
-2.5180851E-002 2.7519568E-002 8.4803211E-003  
-2.7796901E-002 2.6096628E-002 1.0592814E-002  
-3.0377077E-002 2.4228855E-002 1.2506296E-002  
-3.2786968E-002 2.1787297E-002 1.4110491E-002  
-3.5156641E-002 1.8912069E-002 1.5547643E-002  
-3.7551336E-002 1.5589833E-002 1.6916664E-002  
-3.9711541E-002 1.1613865E-002 1.7893968E-002  
-4.1653856E-002 7.1117778E-003 1.8452288E-002  
-4.3632867E-002 1.8866517E-003 1.8365892E-002  
-4.4529363E-002 -3.0746442E-003 1.7597257E-002  
-4.4639836E-002 -7.5063935E-003 1.6409588E-002  
-4.3931979E-002 -1.1286615E-002 1.4857841E-002  
-4.2755441E-002 -1.4525670E-002 1.3150249E-002  
-4.1158580E-002 -1.7385074E-002 1.1331039E-002  
-3.8990781E-002 -1.9801945E-002 9.2692897E-003  
-3.6312982E-002 -2.1902561E-002 7.0070029E-003  
-3.3016499E-002 -2.3468172E-002 4.4872679E-003  
-3.0286717E-002 -2.4181923E-002 2.4919702E-003  
-2.7729205E-002 -2.4477636E-002 6.8240222E-004  
-2.5304268E-002 -2.4352219E-002 -9.9294658E-004

-2.2972503E-002 -2.3949449E-002 -2.5505480E-003  
-2.0728214E-002 -2.3178756E-002 -3.9746130E-003  
-1.8636265E-002 -2.1872096E-002 -5.2713897E-003  
-1.6594614E-002 -2.0243117E-002 -6.4640531E-003  
-1.4749501E-002 -1.8038788E-002 -7.4765685E-003  
-1.3102798E-002 -1.5381109E-002 -8.3187963E-003  
-1.1900441E-002 -1.2806880E-002 -9.0247412E-003  
-1.1098012E-002 -1.0217823E-002 -9.6210222E-003  
-1.0602260E-002 -7.6448981E-003 -1.0091284E-002  
-1.0304763E-002 -5.1374250E-003 -1.0513172E-002  
-1.0312962E-002 -2.6376710E-003 -1.0798005E-002  
-1.0628053E-002 -1.7623450E-004 -1.0952483E-002  
-1.1188691E-002 2.2684759E-003 -1.0973035E-002  
-1.2057154E-002 4.6950902E-003 -1.0839675E-002  
-1.3216855E-002 7.0884435E-003 -1.0544255E-002  
-1.5232275E-002 9.8483494E-003 -9.7061281E-003  
-1.7378925E-002 1.2062733E-002 -8.6605884E-003  
-1.9592109E-002 1.3755436E-002 -7.4512966E-003  
-2.1863760E-002 1.4923794E-002 -6.1147452E-003  
-2.4137937E-002 1.5613771E-002 -4.6652192E-003  
-2.6426477E-002 1.6022050E-002 -3.0967235E-003  
-2.8754687E-002 1.5933177E-002 -1.3938678E-003  
-3.1097689E-002 1.5456159E-002 4.7007932E-004  
-3.3446069E-002 1.4379082E-002 2.4496070E-003  
-3.6044736E-002 1.2728925E-002 3.9392813E-003  
-3.8238747E-002 1.0738931E-002 5.0750161E-003  
-3.9958344E-002 8.4968376E-003 5.8980934E-003  
-4.1366449E-002 6.1435187E-003 6.4127983E-003  
-4.2474072E-002 3.6415443E-003 6.6879838E-003  
-4.3283885E-002 9.5214694E-004 6.7178604E-003  
-4.3677489E-002 -1.9516395E-003 6.4309624E-003  
-4.3653977E-002 -5.0491868E-003 5.8160381E-003  
-4.3050552E-002 -8.2856606E-003 4.7515023E-003  
-4.2206747E-002 -1.0829938E-002 3.3217153E-003  
-4.1057504E-002 -1.2918274E-002 1.7904946E-003  
-3.9594363E-002 -1.4479684E-002 2.1626690E-004  
-3.7949174E-002 -1.5552225E-002 -1.3143698E-003  
-3.6204038E-002 -1.6289728E-002 -2.8752411E-003  
-3.4276806E-002 -1.6702902E-002 -4.4330191E-003  
-3.2136534E-002 -1.6659015E-002 -6.0056282E-003  
-2.9800540E-002 -1.6218891E-002 -7.5944162E-003  
-2.7301513E-002 -1.5201998E-002 -9.1554842E-003  
-2.3484522E-002 -1.0782606E-002 -1.2845422E-002  
-2.1524446E-002 -5.6036918E-003 -1.4573292E-002  
-2.1211664E-002 -1.4067144E-003 -1.4872736E-002  
-2.1768513E-002 1.8179011E-003 -1.4782662E-002  
-2.3109006E-002 4.5541002E-003 -1.4562819E-002  
-2.5610587E-002 7.2078207E-003 -1.3961512E-002  
-3.0091730E-002 9.7711808E-003 -1.2229904E-002  
-3.6646786E-002 1.0870311E-002 -8.2266872E-003  
-4.1543826E-002 8.3596720E-003 -3.4858978E-003  
-4.6592778E-002 4.7642797E-003 -8.0264041E-003  
-4.1831245E-002 -4.9565936E-003 -9.8259420E-003  
-3.9174703E-002 -9.7914651E-003 -1.0835268E-002  
-3.7612275E-002 -1.1213060E-002 -1.0899344E-002  
-3.7233786E-002 -1.1378608E-002 -1.1259777E-002  
-3.7450268E-002 -1.0962934E-002 -1.2112970E-002  
-3.8080993E-002 -9.9005929E-003 -1.3005598E-002  
-3.8769800E-002 -7.3716409E-003 -1.3856219E-002  
6.2552141E-003 -1.3115063E-002 -7.2205132E-003

3.9711438E-003 -1.3047527E-002 -6.8373286E-003  
1.8945647E-003 -1.2575171E-002 -6.5203273E-003  
9.5404136E-005 -1.1642898E-002 -6.4219398E-003  
-1.3960743E-003 -1.0201673E-002 -6.4635122E-003  
-2.5826907E-003 -8.2665767E-003 -6.6583605E-003  
-3.3141015E-003 -5.6632616E-003 -6.9171415E-003  
-3.4983186E-003 -2.1581594E-003 -7.0604145E-003  
-3.7789068E-003 1.7692400E-003 -7.6359724E-003  
-4.5662120E-003 4.6291285E-003 -9.4684689E-003  
-5.6950136E-003 6.7166394E-003 -1.1813683E-002  
-6.8023334E-003 8.9250925E-003 -1.3513619E-002  
-7.9787942E-003 1.1065000E-002 -1.4533278E-002  
-9.2056039E-003 1.3053522E-002 -1.4670046E-002  
-1.0512302E-002 1.5093044E-002 -1.4658903E-002  
-1.1911349E-002 1.6876787E-002 -1.3779549E-002  
-1.3346909E-002 1.8462985E-002 -1.2080104E-002  
-1.5018853E-002 2.0007940E-002 -1.0192846E-002  
-1.6932729E-002 2.1419801E-002 -7.9091098E-003  
-1.8603140E-002 2.2128176E-002 -5.9790307E-003  
-2.0269613E-002 2.2586414E-002 -4.0880304E-003  
-2.1967259E-002 2.2803895E-002 -2.3108910E-003  
-2.3758028E-002 2.2778547E-002 -7.2418071E-004  
-2.5537146E-002 2.2548186E-002 7.5562276E-004  
-2.7313540E-002 2.2138353E-002 2.1276939E-003  
-2.9128347E-002 2.1547870E-002 3.3345635E-003  
-3.0966259E-002 2.0770305E-002 4.4029787E-003  
-3.2770608E-002 1.9799088E-002 5.4145380E-003  
-3.5564793E-002 1.7023049E-002 7.1358064E-003  
-3.7903901E-002 1.4100856E-002 8.5337543E-003  
-3.9845964E-002 1.1042133E-002 9.5134322E-003  
-4.1432042E-002 7.8720251E-003 1.0084297E-002  
-4.2583430E-002 4.5664609E-003 1.0273649E-002  
-4.3357497E-002 1.1437919E-003 1.0076357E-002  
-4.3744220E-002 -2.3955701E-003 9.4961686E-003  
-4.3782070E-002 -6.0536578E-003 8.4479843E-003  
-4.3347952E-002 -9.8867933E-003 7.0354153E-003  
-4.2380697E-002 -1.2600690E-002 5.5914764E-003  
-4.1095240E-002 -1.4912330E-002 4.1705087E-003  
-3.9528758E-002 -1.6784657E-002 2.7549143E-003  
-3.7738735E-002 -1.8221761E-002 1.2894606E-003  
-3.5707825E-002 -1.9204184E-002 -1.5323079E-004  
-3.3516295E-002 -1.9807579E-002 -1.7455060E-003  
-3.1101563E-002 -1.9992154E-002 -3.3823722E-003  
-2.8490509E-002 -1.9801042E-002 -5.1649278E-003  
-2.5580511E-002 -1.9080999E-002 -6.8075724E-003  
-2.3149406E-002 -1.7354816E-002 -8.3242027E-003  
-2.1111269E-002 -1.5389053E-002 -9.6052491E-003  
-1.9497385E-002 -1.3260722E-002 -1.0803627E-002  
-1.8255549E-002 -1.0791063E-002 -1.1444693E-002  
-1.7426418E-002 -8.1931056E-003 -1.2060095E-002  
-1.7047735E-002 -5.3555339E-003 -1.2408994E-002  
-1.7055227E-002 -2.3354546E-003 -1.2679777E-002  
-1.7447362E-002 9.2087784E-004 -1.2647230E-002  
-1.8214711E-002 4.3841150E-003 -1.2279769E-002  
-1.9517591E-002 6.8454103E-003 -1.1493234E-002  
-2.0949174E-002 8.8768393E-003 -1.0585733E-002  
-2.2524828E-002 1.0455432E-002 -9.5382568E-003  
-2.4256655E-002 1.1589829E-002 -8.4148406E-003  
-2.6160558E-002 1.2322754E-002 -7.2861105E-003  
-2.8241935E-002 1.2659696E-002 -6.1171624E-003

-3.0489341E-002 1.2548205E-002 -4.8299767E-003  
-3.2824837E-002 1.1953781E-002 -3.3289512E-003  
-3.5329157E-002 1.0957597E-002 -1.7980939E-003  
-3.7258630E-002 9.6525263E-003 -7.5960596E-004  
-3.8863819E-002 8.1189543E-003 6.8710562E-005  
-4.0217220E-002 6.4810098E-003 6.9675635E-004  
-4.1317996E-002 4.6985886E-003 1.0964385E-003  
-4.2180764E-002 2.8037819E-003 1.2756963E-003  
-4.2774340E-002 7.7171898E-004 1.2712872E-003  
-4.3235000E-002 -1.3941001E-003 9.7762976E-004  
-4.3122916E-002 -3.7479745E-003 6.6214383E-004  
-4.2871526E-002 -6.2329255E-003 -5.2648313E-005  
-4.2053771E-002 -8.2594366E-003 -1.0724065E-003  
-4.1202305E-002 -9.9947538E-003 -2.2355716E-003  
-4.0149855E-002 -1.1372780E-002 -3.3947924E-003  
-3.8941359E-002 -1.2360282E-002 -4.5720489E-003  
-3.7539748E-002 -1.2915849E-002 -5.7486705E-003  
-3.6059148E-002 -1.3154510E-002 -7.0309904E-003  
-3.4459825E-002 -1.3014162E-002 -8.3807009E-003  
-3.2733119E-002 -1.2570443E-002 -9.8223546E-003  
-3.0831768E-002 -1.1727895E-002 -1.1233884E-002  
-2.8164899E-002 -8.2237185E-003 -1.3545807E-002  
-2.6317502E-002 -4.9459749E-003 -1.4942000E-002  
-2.5478218E-002 -2.0505391E-003 -1.5396701E-002  
-2.5624329E-002 4.1605853E-004 -1.5452240E-002  
-2.6698354E-002 2.5539253E-003 -1.5294557E-002  
-2.8827219E-002 4.5247384E-003 -1.5893913E-002  
-3.2431397E-002 6.7077882E-003 -1.5568147E-002  
-3.6503241E-002 8.0028297E-003 -1.1832477E-002  
-4.0365470E-002 7.7269235E-003 -8.6193314E-003  
-4.1256367E-002 3.2164390E-003 -1.1087311E-002  
-4.1046691E-002 -2.0405840E-003 -1.3322845E-002  
-3.9837859E-002 -6.1072049E-003 -1.4430313E-002  
-3.8845901E-002 -7.9219331E-003 -1.3805554E-002  
-3.8439049E-002 -8.6899178E-003 -1.3579438E-002  
-3.8480033E-002 -8.6379666E-003 -1.3666405E-002  
-3.8622026E-002 -7.8706826E-003 -1.3865928E-002  
-3.8962549E-002 -6.0581545E-003 -1.4665527E-002  
7.0357727E-003 -3.8429584E-003 1.6522216E-002  
9.4950828E-003 -5.5730174E-003 1.9345808E-002  
1.2744295E-002 -7.0078716E-003 2.1471523E-002  
1.5866896E-002 -8.2100519E-003 2.3802207E-002  
1.9395106E-002 -9.2456847E-003 2.4698294E-002  
2.2918397E-002 -9.9404687E-003 2.5977292E-002  
2.6425493E-002 -1.0835113E-002 2.7376134E-002  
3.0075951E-002 -1.1202652E-002 2.7618593E-002  
3.3843134E-002 -1.1523684E-002 2.8317371E-002  
3.7850623E-002 -1.1446781E-002 2.9037554E-002

'Coordinates for shape change graph for 'PC2' from 'PCA: CovMatrix,  
Tragulidae, Procrustes coordinates' in the MorphoJ project named 'new  
project...'

'The scale factor used for the shape change is 0.1

'Generated by MorphoJ, version 1.06d

1 2L 2058 1 9999 Dim=3

starting\_shape

PC2 hypothetical value 0.1

4.0608703E-002 -9.7871335E-003 2.3029292E-002  
2.4114897E-002 -2.8573231E-002 -1.0973601E-002  
2.5321920E-002 -2.9503887E-002 -1.2744875E-002  
2.7011522E-002 -3.0666583E-002 -1.3812276E-002  
2.8852052E-002 -3.1748846E-002 -1.4363195E-002  
3.0810386E-002 -3.2755895E-002 -1.4528125E-002  
3.2925174E-002 -3.3723074E-002 -1.4335492E-002  
3.5241587E-002 -3.4672314E-002 -1.3777389E-002  
3.7756438E-002 -3.5606888E-002 -1.2854293E-002  
4.0454369E-002 -3.6498515E-002 -1.1482194E-002  
4.3231319E-002 -3.7293054E-002 -9.5247877E-003  
4.5801849E-002 -3.7987752E-002 -7.1808873E-003  
4.7988393E-002 -3.8228121E-002 -4.6576194E-003  
4.9720656E-002 -3.8131321E-002 -2.0133942E-003  
5.1107868E-002 -3.7715626E-002 7.1402955E-004  
5.2118292E-002 -3.7015534E-002 3.3512582E-003  
5.2786404E-002 -3.5982675E-002 6.1266717E-003  
5.3210546E-002 -3.4612294E-002 9.0816613E-003  
5.3179410E-002 -3.2910324E-002 1.2050018E-002  
5.2695567E-002 -3.0880906E-002 1.5066584E-002  
5.1622200E-002 -2.7949433E-002 1.8004775E-002  
4.9971551E-002 -2.5144339E-002 2.0274598E-002  
4.7827436E-002 -2.2490358E-002 2.1898818E-002  
4.5233021E-002 -1.9951857E-002 2.2896139E-002  
4.2160571E-002 -1.7542229E-002 2.3242681E-002  
3.8569481E-002 -1.5304769E-002 2.2901458E-002  
3.4549415E-002 -1.3138546E-002 2.1927896E-002  
3.0103048E-002 -1.0862733E-002 2.0437527E-002  
2.5148579E-002 -8.8191935E-003 1.8249646E-002  
2.3144366E-002 -7.8409346E-003 1.6791539E-002  
2.1441702E-002 -7.2571906E-003 1.5280402E-002  
2.0106091E-002 -7.2326208E-003 1.3671190E-002  
1.9203879E-002 -7.7812080E-003 1.1990936E-002  
1.8665150E-002 -8.8043618E-003 1.0246202E-002  
1.8484485E-002 -1.0331841E-002 8.4276930E-003  
1.8540212E-002 -1.2296599E-002 6.4736948E-003  
1.8837079E-002 -1.4753106E-002 4.3271425E-003  
1.9760022E-002 -1.7756764E-002 2.3201477E-003  
2.0987196E-002 -1.9517981E-002 1.7621757E-003  
2.2257046E-002 -2.1187247E-002 1.2057654E-003  
2.3249589E-002 -2.2696151E-002 2.9337603E-004  
2.3963252E-002 -2.4044517E-002 -9.1885541E-004  
2.4434507E-002 -2.5236517E-002 -2.4030918E-003  
2.4664563E-002 -2.6293304E-002 -4.1531026E-003  
2.4580030E-002 -2.7144756E-002 -6.2400791E-003  
2.4222122E-002 -2.7740358E-002 -8.6554506E-003  
1.7969908E-002 -2.8019034E-002 -1.5356180E-002  
2.0014581E-002 -2.9296105E-002 -1.6830318E-002  
2.2282921E-002 -3.0487875E-002 -1.7799803E-002  
2.4644739E-002 -3.1588256E-002 -1.8340109E-002  
2.7045132E-002 -3.2708437E-002 -1.8624664E-002  
2.9501803E-002 -3.3748587E-002 -1.8562197E-002  
3.2033870E-002 -3.4770009E-002 -1.8188504E-002  
3.4640345E-002 -3.5740041E-002 -1.7468159E-002  
3.7330328E-002 -3.6700492E-002 -1.6427402E-002  
4.0091568E-002 -3.7589098E-002 -1.5010781E-002  
4.2021600E-002 -3.8224858E-002 -1.3782042E-002  
4.3843264E-002 -3.8720695E-002 -1.2419099E-002  
4.5557229E-002 -3.9127631E-002 -1.0956925E-002  
4.7178010E-002 -3.9443075E-002 -9.3913309E-003

4.8700464E-002 -3.9660446E-002 -7.7067636E-003  
5.0130505E-002 -3.9777878E-002 -5.8914132E-003  
5.1435185E-002 -3.9747319E-002 -3.9275736E-003  
5.2635967E-002 -3.9608342E-002 -1.8333096E-003  
5.3641369E-002 -3.9233778E-002 4.0392323E-004  
5.4440963E-002 -3.8754274E-002 2.5707880E-003  
5.5045962E-002 -3.8101561E-002 4.6821648E-003  
5.5495398E-002 -3.7340561E-002 6.7234026E-003  
5.5811012E-002 -3.6477119E-002 8.7025246E-003  
5.5953064E-002 -3.5497184E-002 1.0609842E-002  
5.6001785E-002 -3.4438263E-002 1.2474337E-002  
5.5877844E-002 -3.3250041E-002 1.4270213E-002  
5.5616957E-002 -3.1949296E-002 1.6000999E-002  
5.5174978E-002 -3.0512364E-002 1.7641135E-002  
5.4529313E-002 -2.8543154E-002 1.9609758E-002  
5.3546221E-002 -2.6521139E-002 2.1329978E-002  
5.2250887E-002 -2.4393782E-002 2.2879139E-002  
5.0561233E-002 -2.2155578E-002 2.4146766E-002  
4.8495049E-002 -1.9790331E-002 2.5118478E-002  
4.6025220E-002 -1.7301904E-002 2.5692058E-002  
4.3213911E-002 -1.4695145E-002 2.5966899E-002  
4.0100885E-002 -1.1917023E-002 2.6422887E-002  
3.6594325E-002 -9.1103374E-003 2.6376031E-002  
1.9356807E-002 2.4765107E-002 6.1950640E-003  
2.0305571E-002 2.5993149E-002 4.4721739E-003  
2.1851884E-002 2.7303785E-002 3.1276342E-003  
2.3721848E-002 2.8354086E-002 2.1362320E-003  
2.5700161E-002 2.9127446E-002 1.3332189E-003  
2.7759379E-002 2.9727923E-002 6.2817186E-004  
2.9945701E-002 3.0170701E-002 3.5932138E-005  
3.2284650E-002 3.0506406E-002 -4.9724910E-004  
3.4803868E-002 3.0670915E-002 -8.8636274E-004  
3.7494576E-002 3.0615454E-002 -1.0852455E-003  
4.0026087E-002 3.0072002E-002 -9.9585837E-004  
4.2550469E-002 2.9576649E-002 -9.3729335E-004  
4.4835615E-002 2.8731121E-002 -5.7232683E-004  
4.6920304E-002 2.7651385E-002 2.5528878E-005  
4.8872060E-002 2.6377664E-002 7.7476574E-004  
5.0700654E-002 2.4887122E-002 1.6827618E-003  
5.2362607E-002 2.3179036E-002 2.8033686E-003  
5.3873747E-002 2.1219088E-002 4.1037817E-003  
5.5107557E-002 1.9019741E-002 5.6518274E-003  
5.6354670E-002 1.5249092E-002 8.1271149E-003  
5.6686863E-002 1.1745166E-002 1.0572854E-002  
5.6263888E-002 8.6541368E-003 1.2871620E-002  
5.5233370E-002 5.9167501E-003 1.4963524E-002  
5.3654049E-002 3.4586062E-003 1.6857551E-002  
5.1546912E-002 1.1859374E-003 1.8574710E-002  
4.8733847E-002 -7.8278263E-004 2.0141291E-002  
4.5154637E-002 -2.2842375E-003 2.1554118E-002  
4.0914386E-002 -3.0702949E-003 2.2832292E-002  
3.5972312E-002 -3.1914287E-003 2.2270854E-002  
3.1590063E-002 -2.7425333E-003 2.1650006E-002  
2.7827716E-002 -1.8569454E-003 2.0990218E-002  
2.4623890E-002 -8.1027675E-004 2.0242906E-002  
2.1966506E-002 5.1537830E-004 1.9407850E-002  
1.9890226E-002 2.3098475E-003 1.8533815E-002  
1.8452094E-002 4.5644453E-003 1.7605542E-002  
1.7502223E-002 7.1510459E-003 1.6505577E-002  
1.7280327E-002 1.0085901E-002 1.5641726E-002



1.8206500E-002 1.1947892E-002 1.5487361E-002  
1.9234613E-002 1.3784783E-002 1.5353621E-002  
1.9991477E-002 1.5558139E-002 1.4905683E-002  
2.0516198E-002 1.7257458E-002 1.4176697E-002  
2.0797577E-002 1.8895391E-002 1.3173241E-002  
2.0842204E-002 2.0488659E-002 1.1900275E-002  
2.0492066E-002 2.1948201E-002 1.0202855E-002  
1.9777636E-002 2.3267028E-002 8.1392709E-003  
1.2137528E-002 2.6255787E-002 4.6683279E-003  
1.3576774E-002 2.7799233E-002 3.5122662E-003  
1.5341149E-002 2.9080029E-002 2.4511919E-003  
1.7300965E-002 3.0140391E-002 1.4822245E-003  
1.9392238E-002 3.1051946E-002 5.9048138E-004  
2.1618856E-002 3.1808472E-002 -2.2455537E-004  
2.3973898E-002 3.2469333E-002 -9.6368114E-004  
2.6474596E-002 3.3014446E-002 -1.6395860E-003  
2.9120669E-002 3.3451651E-002 -2.2465994E-003  
3.1918664E-002 3.3728916E-002 -2.7642755E-003  
3.4198262E-002 3.3814823E-002 -3.0921664E-003  
3.6441019E-002 3.3648544E-002 -3.2707861E-003  
3.8610125E-002 3.3333993E-002 -3.2692791E-003  
4.0737854E-002 3.2891820E-002 -3.1692096E-003  
4.2821917E-002 3.2266912E-002 -2.9557314E-003  
4.4848869E-002 3.1527368E-002 -2.6020090E-003  
4.6822079E-002 3.0632641E-002 -2.1029154E-003  
4.8775202E-002 2.9595645E-002 -1.5093497E-003  
5.0635944E-002 2.8355515E-002 -7.5616279E-004  
5.2599616E-002 2.6794396E-002 2.2815072E-004  
5.4318030E-002 2.5109307E-002 1.3025973E-003  
5.5805453E-002 2.3330705E-002 2.4736262E-003  
5.7045199E-002 2.1447211E-002 3.7259761E-003  
5.8018612E-002 1.9477471E-002 5.0848119E-003  
5.8793731E-002 1.7395178E-002 6.5264566E-003  
5.9373373E-002 1.5177305E-002 8.0483614E-003  
5.9667721E-002 1.2875043E-002 9.6845305E-003  
5.9596918E-002 1.0441223E-002 1.1370401E-002  
5.8911437E-002 7.2643065E-003 1.3720746E-002  
5.7787658E-002 4.3220764E-003 1.5917967E-002  
5.6153170E-002 1.6477450E-003 1.7925604E-002  
5.4081884E-002 -7.7686089E-004 1.9778198E-002  
5.1555932E-002 -2.9754703E-003 2.1462653E-002  
4.8489890E-002 -4.8693647E-003 2.2903723E-002  
4.4925880E-002 -6.4890093E-003 2.4113485E-002  
4.1041543E-002 -7.9449613E-003 2.5405348E-002  
3.6594325E-002 -9.1103374E-003 2.6376031E-002  
2.4779385E-002 -7.6774117E-003 -1.7548036E-002  
2.5398601E-002 -7.0550645E-003 -1.8651195E-002  
2.6159505E-002 -6.1310566E-003 -1.9551326E-002  
2.6979573E-002 -4.9870639E-003 -2.0267586E-002  
2.7831094E-002 -3.6558015E-003 -2.0820781E-002  
2.8711355E-002 -2.1453690E-003 -2.1234238E-002  
2.9596618E-002 -4.4666496E-004 -2.1592325E-002  
3.0497908E-002 1.4522744E-003 -2.1888549E-002  
3.1415544E-002 3.5572768E-003 -2.2127234E-002  
3.2384155E-002 5.8488292E-003 -2.2155422E-002  
3.3229461E-002 7.4912311E-003 -2.2130070E-002  
3.4064030E-002 9.0622700E-003 -2.1888877E-002  
3.4844979E-002 1.0581069E-002 -2.1560971E-002  
3.5606539E-002 1.2032689E-002 -2.1078794E-002  
3.6324056E-002 1.3487541E-002 -2.0473043E-002

3.7010263E-002 1.4813154E-002 -1.9721955E-002  
3.7669994E-002 1.6058280E-002 -1.8849586E-002  
3.8302692E-002 1.7368030E-002 -1.7828428E-002  
3.8869539E-002 1.8479121E-002 -1.6687860E-002  
3.9421225E-002 1.9846818E-002 -1.5288169E-002  
3.9829943E-002 2.0984725E-002 -1.3805730E-002  
4.0101389E-002 2.1930184E-002 -1.2234022E-002  
4.0224974E-002 2.2680110E-002 -1.0605474E-002  
4.0231371E-002 2.3232965E-002 -8.8997343E-003  
4.0100521E-002 2.3589038E-002 -7.1250224E-003  
3.9851955E-002 2.3807030E-002 -5.2676504E-003  
3.9477516E-002 2.3811039E-002 -3.3128742E-003  
3.8959868E-002 2.3576783E-002 -1.2818769E-003  
3.7714838E-002 2.2741721E-002 2.0346168E-003  
3.6255645E-002 2.1484742E-002 4.7569438E-003  
3.4677586E-002 2.0043080E-002 6.9850885E-003  
3.2939117E-002 1.8372100E-002 8.6661834E-003  
3.1051157E-002 1.6595525E-002 9.9289351E-003  
2.8987778E-002 1.4598698E-002 1.0719098E-002  
2.6772627E-002 1.2377913E-002 1.1011181E-002  
2.4404371E-002 9.9365168E-003 1.0732204E-002  
2.1961766E-002 7.2793024E-003 9.7655853E-003  
2.1086612E-002 5.2310811E-003 8.9570027E-003  
2.0378775E-002 3.2952673E-003 7.9644227E-003  
2.0006865E-002 1.4453501E-003 6.7858921E-003  
1.9754439E-002 -2.7387242E-004 5.5738066E-003  
1.9506432E-002 -1.8400868E-003 4.2657055E-003  
1.9350804E-002 -3.2907558E-003 2.8362697E-003  
1.9247973E-002 -4.6944352E-003 1.2302977E-003  
1.9530484E-002 -6.0252777E-003 -4.4830437E-004  
2.0554787E-002 -6.9208873E-003 -1.9716761E-003  
2.1271092E-002 -6.5181639E-003 -3.3565927E-003  
2.2134831E-002 -6.0704558E-003 -4.7426302E-003  
2.2964669E-002 -5.6970278E-003 -6.2232181E-003  
2.3605766E-002 -5.5514112E-003 -7.8288064E-003  
2.4039962E-002 -5.6633944E-003 -9.5582893E-003  
2.4243903E-002 -6.0623931E-003 -1.1433180E-002  
2.4195452E-002 -6.7537554E-003 -1.3494119E-002  
2.4143126E-002 -7.4967810E-003 -1.5710491E-002  
2.3171219E-002 -1.3046298E-002 -2.0781587E-002  
2.4253466E-002 -1.1843884E-002 -2.1770399E-002  
2.5286527E-002 -1.0496226E-002 -2.2627419E-002  
2.6260441E-002 -9.0056843E-003 -2.3338537E-002  
2.7179044E-002 -7.4095011E-003 -2.3944837E-002  
2.8063316E-002 -5.7069878E-003 -2.4399208E-002  
2.8911318E-002 -3.8962713E-003 -2.4725623E-002  
2.9722098E-002 -1.9930376E-003 -2.4950106E-002  
3.0500587E-002 1.5733905E-005 -2.5162327E-002  
3.1276339E-002 2.1078534E-003 -2.5353605E-002  
3.2067086E-002 4.0849791E-003 -2.5418188E-002  
3.2891497E-002 5.9831493E-003 -2.5416085E-002  
3.3689314E-002 7.8170648E-003 -2.5252651E-002  
3.4512483E-002 9.5827332E-003 -2.4965196E-002  
3.5334567E-002 1.1284841E-002 -2.4576062E-002  
3.6146198E-002 1.2928310E-002 -2.4015316E-002  
3.6941479E-002 1.4504162E-002 -2.3288350E-002  
3.7789066E-002 1.6013069E-002 -2.2458865E-002  
3.8558546E-002 1.7456610E-002 -2.1457432E-002  
3.8884753E-002 1.9819457E-002 -1.9400419E-002  
4.0106671E-002 2.1835818E-002 -1.7664434E-002

4.0924293E-002 2.3464245E-002 -1.5755318E-002  
4.1461438E-002 2.4778456E-002 -1.3658366E-002  
4.1860626E-002 2.5704154E-002 -1.1478334E-002  
4.1941165E-002 2.6432383E-002 -8.9890025E-003  
4.1828655E-002 2.6848285E-002 -6.3149706E-003  
4.1662706E-002 2.7083688E-002 -3.4411546E-003  
4.1008440E-002 2.6720199E-002 -4.9133271E-004  
4.0040199E-002 2.6008279E-002 3.2484902E-003  
3.8479107E-002 2.4630868E-002 6.3724641E-003  
3.6854595E-002 2.3080287E-002 9.0533287E-003  
3.5011081E-002 2.1259618E-002 1.1235843E-002  
3.2979904E-002 1.9170578E-002 1.2976202E-002  
3.0704001E-002 1.6784639E-002 1.4227585E-002  
2.8187246E-002 1.4097599E-002 1.4982068E-002  
2.5423644E-002 1.1112461E-002 1.5223828E-002  
2.2450606E-002 7.8718217E-003 1.4897519E-002  
1.3119738E-002 8.1011753E-004 -5.9902751E-003  
1.2119881E-002 1.3327859E-003 -6.1510246E-003  
1.1101526E-002 1.7410568E-003 -6.3538222E-003  
1.0086893E-002 1.9958072E-003 -6.5182121E-003  
9.0972417E-003 2.1208677E-003 -6.6882065E-003  
8.1622276E-003 2.1774881E-003 -6.7869308E-003  
7.2017974E-003 2.2208606E-003 -7.0672344E-003  
6.2707961E-003 1.8361653E-003 -7.0189178E-003  
5.3340420E-003 1.4761929E-003 -7.0916276E-003  
4.3751473E-003 1.0006431E-003 -7.2239416E-003  
3.1888405E-003 4.9737364E-004 -7.2653919E-003  
2.1722350E-003 -9.0214737E-005 -7.3236642E-003  
1.3396076E-003 -7.5967493E-004 -7.4224875E-003  
6.7824556E-004 -1.5259792E-003 -7.5917624E-003  
1.8559405E-004 -2.3830097E-003 -7.7895516E-003  
-1.2641041E-004 -3.3707062E-003 -8.0226371E-003  
-2.3340308E-004 -4.4770578E-003 -8.2751204E-003  
-1.2205196E-004 -5.7094139E-003 -8.5267871E-003  
2.5350168E-004 -7.0066539E-003 -8.7412176E-003  
1.2659621E-003 -7.8160882E-003 -9.2468785E-003  
2.3152754E-003 -8.4027375E-003 -9.6615561E-003  
3.3606385E-003 -8.7519359E-003 -9.9701273E-003  
4.3850902E-003 -8.8916481E-003 -1.0149262E-002  
5.3677288E-003 -8.8546087E-003 -1.0295850E-002  
6.3441421E-003 -8.6126460E-003 -1.0335604E-002  
7.3150620E-003 -8.1996432E-003 -1.0308275E-002  
8.2833572E-003 -7.5433538E-003 -1.0212246E-002  
9.2261781E-003 -6.7127890E-003 -9.9616028E-003  
1.0111897E-002 -6.0319331E-003 -9.6555447E-003  
1.0886535E-002 -5.3100779E-003 -9.2915859E-003  
1.1529310E-002 -4.5543951E-003 -8.8766141E-003  
1.2087707E-002 -3.7642497E-003 -8.4683445E-003  
1.2543804E-002 -2.9375359E-003 -8.0633098E-003  
1.2880607E-002 -2.0594353E-003 -7.6049478E-003  
1.3095995E-002 -1.1331966E-003 -7.1003908E-003  
1.3197680E-002 -1.5255094E-004 -6.6050173E-003  
-2.7683078E-002 1.7182696E-002 1.9410468E-002  
-3.0228873E-002 1.9845864E-002 1.8117246E-002  
-3.2201997E-002 2.1779862E-002 1.7114244E-002  
-3.4783765E-002 2.3531171E-002 1.4591000E-002  
-3.5548425E-002 2.3485468E-002 1.3068783E-002  
-3.6182808E-002 2.2981341E-002 1.1257246E-002  
-3.6390737E-002 2.1612325E-002 8.9539941E-003  
-3.7549336E-002 -1.1488581E-002 1.7153890E-002

-4.0125930E-002 -1.1959336E-002 1.6254021E-002  
-4.2132130E-002 -1.2304301E-002 1.5422944E-002  
-4.3532784E-002 -1.2378171E-002 1.4373832E-002  
-4.4781772E-002 -1.1973248E-002 1.1885515E-002  
-4.4882344E-002 -1.1595358E-002 1.0412001E-002  
-4.4586981E-002 -1.1021636E-002 8.6448682E-003  
-1.7373731E-002 -2.0399894E-002 5.5009745E-003  
-1.7830018E-002 -2.1651171E-002 3.9064901E-003  
-1.8247212E-002 -2.2632934E-002 2.5217158E-003  
-1.8782521E-002 -2.3164146E-002 1.2345732E-003  
-2.0202560E-002 -2.2884781E-002 -1.1069141E-003  
-2.1082580E-002 -2.2165391E-002 -2.2241291E-003  
-2.2108583E-002 -2.1018110E-002 -3.3092306E-003  
-3.2445548E-002 1.1453935E-002 4.1860369E-003  
-3.3685633E-002 1.2804319E-002 3.3735492E-003  
-3.4668381E-002 1.3577179E-002 2.3677816E-003  
-3.5372082E-002 1.3838133E-002 1.3439191E-003  
-3.6172618E-002 1.3406023E-002 -7.1322251E-004  
-3.6352025E-002 1.2770025E-002 -1.8843472E-003  
-3.6375146E-002 1.1776921E-002 -3.2226084E-003  
-3.8493393E-002 -8.7977185E-003 6.2964295E-003  
-4.1105439E-002 -9.0602568E-003 5.2289212E-003  
-4.2390538E-002 -9.1552141E-003 3.9910594E-003  
-4.3691662E-002 -9.2253885E-003 2.0644556E-003  
-4.3863291E-002 -9.0609495E-003 1.0502744E-003  
-4.3849586E-002 -8.7819353E-003 -1.0548108E-004  
-4.3561127E-002 -8.3206225E-003 -1.4831023E-003  
-2.3248996E-002 -1.4801159E-002 -1.9340083E-003  
-2.3624777E-002 -1.6911009E-002 -3.9228625E-003  
-2.4992124E-002 -1.6726967E-002 -5.8707290E-003  
-2.5905792E-002 -1.7033890E-002 -7.8491392E-003  
-2.6437071E-002 -1.6737142E-002 -8.6559787E-003  
-2.7070305E-002 -1.6232639E-002 -9.4634560E-003  
-2.7851627E-002 -1.5416334E-002 -1.0288931E-002  
1.0897451E-002 1.5626175E-002 2.2511334E-005  
9.8775794E-003 1.5104033E-002 4.6265832E-004  
8.6697572E-003 1.3988047E-002 1.4033813E-003  
6.1507575E-003 1.4881583E-002 8.1772218E-004  
4.2794931E-003 1.4793861E-002 1.3282020E-003  
2.3614897E-003 1.4978350E-002 1.8389422E-003  
1.6327756E-004 1.5097386E-002 2.7081661E-003  
-2.2335062E-003 1.4979701E-002 3.9943866E-003  
-4.7839861E-003 1.4585216E-002 5.5505021E-003  
-7.4261218E-003 1.4327716E-002 7.2014024E-003  
-9.0534143E-003 1.4149340E-002 7.9604636E-003  
-1.0739908E-002 1.4000824E-002 8.7131240E-003  
-1.2459266E-002 1.3813399E-002 9.4472228E-003  
-1.4204749E-002 1.3470690E-002 1.0205448E-002  
-1.5990758E-002 1.3090784E-002 1.0931881E-002  
-1.7804152E-002 1.2550707E-002 1.1693964E-002  
-1.9650017E-002 1.1871844E-002 1.2473617E-002  
-2.1510184E-002 1.1035451E-002 1.3280888E-002  
-2.3297528E-002 9.9406388E-003 1.4131722E-002  
-2.5543477E-002 8.1534496E-003 1.4713921E-002  
-2.7446171E-002 6.3050138E-003 1.5145231E-002  
-2.9061930E-002 4.4077809E-003 1.5406458E-002  
-3.0323908E-002 2.4389309E-003 1.5536324E-002  
-3.1331976E-002 4.5044154E-004 1.5510369E-002  
-3.1965363E-002 -1.6137939E-003 1.5339714E-002  
-3.2320277E-002 -3.7461558E-003 1.5023915E-002

-3.2322625E-002 -5.9330476E-003 1.4547505E-002  
-3.1903219E-002 -8.1532314E-003 1.3981946E-002  
-3.1131418E-002 -9.9466275E-003 1.3312022E-002  
-3.0205011E-002 -1.1483269E-002 1.2577118E-002  
-2.9028197E-002 -1.2680200E-002 1.1849007E-002  
-2.7716275E-002 -1.3613172E-002 1.1081082E-002  
-2.6266066E-002 -1.4250344E-002 1.0294633E-002  
-2.4704640E-002 -1.4656472E-002 9.4088781E-003  
-2.2978232E-002 -1.4783998E-002 8.5283388E-003  
-2.1098547E-002 -1.4661628E-002 7.5672489E-003  
-1.9058148E-002 -1.4145168E-002 6.6458340E-003  
-1.6542792E-002 -1.1199275E-002 2.6718885E-003  
-1.4905681E-002 -6.8784677E-003 7.5732010E-004  
-1.4740106E-002 -3.0504783E-003 6.5789577E-004  
-1.5202450E-002 -2.1637094E-004 2.8525548E-004  
-1.6297424E-002 2.0087466E-003 1.2956150E-005  
-1.8064830E-002 3.8896395E-003 -2.0214454E-004  
-2.0823902E-002 5.6805211E-003 -4.1236396E-004  
-2.4839368E-002 7.0193968E-003 3.4388854E-004  
-2.8670106E-002 6.4680847E-003 2.8753324E-003  
-3.3012124E-002 3.6941834E-003 2.2088704E-003  
-3.4852613E-002 -2.3748365E-004 2.4261538E-003  
-3.4962579E-002 -2.9356743E-003 2.7865500E-003  
-3.4461217E-002 -4.7447869E-003 2.4452504E-003  
-3.3814600E-002 -6.1458940E-003 1.8001790E-003  
-3.2893666E-002 -7.3773904E-003 7.2788689E-004  
-3.1409094E-002 -8.6434772E-003 -1.1650760E-003  
-2.8275812E-002 -8.9278350E-003 -3.4019314E-003  
-2.4232950E-002 -7.1771788E-003 -3.6125687E-003  
-2.6516168E-002 -4.0453976E-003 -7.5475450E-003  
-2.8074945E-002 3.6931206E-004 -7.7105844E-003  
-2.8905355E-002 2.4968211E-003 -6.0024735E-003  
-2.9438231E-002 2.4044452E-003 -4.8319074E-003  
-3.0233418E-002 2.1574059E-003 -5.6356765E-003  
-3.1111665E-002 8.7708583E-004 -7.2284881E-003  
-3.0512562E-002 -2.8898936E-003 -8.9557046E-003  
-3.4673559E-002 -2.6148947E-003 -1.4382432E-002  
-2.9695803E-003 2.3564773E-002 1.1663972E-002  
-5.1139059E-003 2.3194274E-002 1.1738421E-002  
-7.3409119E-003 2.2677515E-002 1.2159865E-002  
-9.5818026E-003 2.1964691E-002 1.2843219E-002  
-1.1877189E-002 2.1045531E-002 1.3612530E-002  
-1.4256434E-002 1.9931550E-002 1.4496710E-002  
-1.6788939E-002 1.8635855E-002 1.5465111E-002  
-1.9454498E-002 1.7162709E-002 1.6540572E-002  
-2.2278192E-002 1.5507373E-002 1.7652218E-002  
-2.5223677E-002 1.3689861E-002 1.8826376E-002  
-2.7642963E-002 1.1287954E-002 1.9507047E-002  
-2.9728086E-002 8.8094876E-003 1.9954433E-002  
-3.1490270E-002 6.2787203E-003 2.0150844E-002  
-3.2886970E-002 3.6566571E-003 2.0166358E-002  
-3.3979039E-002 9.9103309E-004 1.9896992E-002  
-3.4715231E-002 -1.7580204E-003 1.9419320E-002  
-3.5084828E-002 -4.5993846E-003 1.8750561E-002  
-3.5087655E-002 -7.5270620E-003 1.7906336E-002  
-3.4676762E-002 -1.0557823E-002 1.7009088E-002  
-3.3301050E-002 -1.2945860E-002 1.5904941E-002  
-3.1757993E-002 -1.4976096E-002 1.4886544E-002  
-3.0061314E-002 -1.6634338E-002 1.3896248E-002  
-2.8238399E-002 -1.7922070E-002 1.2866163E-002

-2.6282311E-002 -1.8827171E-002 1.1796921E-002  
-2.4189366E-002 -1.9352798E-002 1.0701525E-002  
-2.1947454E-002 -1.9512337E-002 9.5770121E-003  
-1.9611974E-002 -1.9251560E-002 8.3478301E-003  
-1.7231833E-002 -1.8566527E-002 6.9814849E-003  
-1.4044597E-002 -1.5927367E-002 5.1853771E-003  
-1.1795052E-002 -1.3102319E-002 3.5047798E-003  
-1.0376122E-002 -1.0186821E-002 2.0790633E-003  
-9.7775623E-003 -7.2010712E-003 9.1387892E-004  
-9.9026516E-003 -4.1159703E-003 8.9719694E-005  
-1.0806100E-002 -9.1189075E-004 -4.2665543E-004  
-1.2495344E-002 2.4032571E-003 -6.6430609E-004  
-1.4981961E-002 5.8294898E-003 -6.1164600E-004  
-1.8213348E-002 9.3812432E-003 -2.1260533E-004  
-2.1636334E-002 1.0188062E-002 1.1187999E-003  
-2.4754401E-002 1.0560245E-002 2.2937121E-003  
-2.7545829E-002 1.0518769E-002 3.3067828E-003  
-3.0005847E-002 1.0057987E-002 4.1698523E-003  
-3.2129662E-002 9.1953461E-003 4.8954293E-003  
-3.3940346E-002 7.9086154E-003 5.4559424E-003  
-3.5421557E-002 6.2138831E-003 5.9227682E-003  
-3.6577273E-002 4.1156760E-003 6.2814031E-003  
-3.7396142E-002 1.5927030E-003 6.3910090E-003  
-3.7502022E-002 -5.2727648E-004 6.2179829E-003  
-3.7451651E-002 -2.5220212E-003 5.8772827E-003  
-3.7146720E-002 -4.2960821E-003 5.4607593E-003  
-3.6657344E-002 -5.9171099E-003 5.0463630E-003  
-3.6025612E-002 -7.3457187E-003 4.5239285E-003  
-3.5155797E-002 -8.6681012E-003 3.9605618E-003  
-3.4062321E-002 -9.8271509E-003 3.4012092E-003  
-3.2892385E-002 -1.0851553E-002 2.6805509E-003  
-3.1482146E-002 -1.1662217E-002 1.9220631E-003  
-2.9885583E-002 -1.2198086E-002 8.4715287E-004  
-2.8419661E-002 -1.2395987E-002 -2.0503583E-004  
-2.6860530E-002 -1.2312804E-002 -9.9267875E-004  
-2.5675620E-002 -1.1930961E-002 -1.8658284E-003  
-2.4517248E-002 -1.1263734E-002 -2.6460330E-003  
-2.3453215E-002 -1.0273495E-002 -3.3561478E-003  
-2.2542541E-002 -8.9615925E-003 -4.0570148E-003  
-2.1801445E-002 -7.3101558E-003 -4.7420627E-003  
-2.1299900E-002 -5.3710568E-003 -5.4945592E-003  
-2.4394508E-002 -2.2107613E-003 -6.4404791E-003  
-2.6201352E-002 1.8742030E-004 -7.2474206E-003  
-2.6806652E-002 2.3735911E-003 -5.7126142E-003  
-2.7677772E-002 3.7713652E-003 -5.0079694E-003  
-2.8716510E-002 4.3834427E-003 -4.9536875E-003  
-3.0073885E-002 3.9961816E-003 -6.0522790E-003  
-2.9213957E-002 2.5852444E-003 -5.7441213E-003  
-3.3610975E-002 -1.2204560E-003 -1.4237527E-002  
1.6497179E-002 1.2720297E-002 -3.8178918E-003  
1.5205868E-002 1.1858583E-002 -5.6106831E-003  
1.3783446E-002 1.1106649E-002 -7.2219295E-003  
1.2299201E-002 1.0608928E-002 -8.7120682E-003  
1.0753687E-002 1.0366428E-002 -1.0082588E-002  
9.1925792E-003 1.0387279E-002 -1.1387332E-002  
7.5872413E-003 1.0662752E-002 -1.2615328E-002  
5.9319919E-003 1.1190372E-002 -1.3750334E-002  
4.1929829E-003 1.1967393E-002 -1.4749499E-002  
2.3680598E-003 1.2973096E-002 -1.5596634E-002  
6.8609384E-004 1.4362247E-002 -1.6059545E-002

-9.1567338E-004 1.5791846E-002 -1.6317153E-002  
-2.4518869E-003 1.7257824E-002 -1.6336320E-002  
-3.9073673E-003 1.8782518E-002 -1.6141957E-002  
-5.3091131E-003 2.0337067E-002 -1.5705092E-002  
-6.6441645E-003 2.1944154E-002 -1.5032462E-002  
-7.9338216E-003 2.3572455E-002 -1.4095631E-002  
-9.1963312E-003 2.5194594E-002 -1.2883750E-002  
-1.0439215E-002 2.6776136E-002 -1.1375842E-002  
-1.1610137E-002 2.8200865E-002 -9.5239395E-003  
-1.2818592E-002 2.9429405E-002 -7.6842287E-003  
-1.4121199E-002 3.0378336E-002 -5.7803139E-003  
-1.5487052E-002 3.1107334E-002 -3.8401170E-003  
-1.6925921E-002 3.1617961E-002 -1.8618931E-003  
-1.8456818E-002 3.1873867E-002 1.5588088E-004  
-2.0073670E-002 3.1884909E-002 2.2275941E-003  
-2.1781015E-002 3.1587523E-002 4.3251492E-003  
-2.3565879E-002 3.1012711E-002 6.4371238E-003  
-2.6094034E-002 2.9935388E-002 8.8747054E-003  
-2.8542285E-002 2.8508866E-002 1.1050280E-002  
-3.0897949E-002 2.6702448E-002 1.2934243E-002  
-3.3192805E-002 2.4581553E-002 1.4580264E-002  
-3.5410538E-002 2.2093561E-002 1.5980707E-002  
-3.7589840E-002 1.9258545E-002 1.7171600E-002  
-3.9676005E-002 1.6004400E-002 1.8086617E-002  
-4.1618582E-002 1.2310874E-002 1.8669606E-002  
-4.3328903E-002 8.2096213E-003 1.8827846E-002  
-4.5011462E-002 2.8823254E-003 1.8216821E-002  
-4.5704011E-002 -2.1238431E-003 1.7185022E-002  
-4.5507801E-002 -6.6084260E-003 1.5891383E-002  
-4.4663534E-002 -1.0553182E-002 1.4510295E-002  
-4.3234644E-002 -1.3999104E-002 1.3069988E-002  
-4.1289663E-002 -1.7047519E-002 1.1591965E-002  
-3.8746315E-002 -1.9695566E-002 1.0027495E-002  
-3.5551703E-002 -2.1923377E-002 8.3525402E-003  
-3.1647066E-002 -2.3555942E-002 6.5265398E-003  
-2.8526011E-002 -2.4296064E-002 5.1501101E-003  
-2.5564085E-002 -2.4499285E-002 3.7832233E-003  
-2.2811912E-002 -2.4312343E-002 2.4772429E-003  
-2.0275550E-002 -2.3715498E-002 1.2273748E-003  
-1.7959320E-002 -2.2735007E-002 3.2361694E-005  
-1.5831181E-002 -2.1418167E-002 -1.1175030E-003  
-1.3891632E-002 -1.9740708E-002 -2.2228401E-003  
-1.2118726E-002 -1.7708246E-002 -3.2866401E-003  
-1.0612505E-002 -1.5234647E-002 -4.2747259E-003  
-9.5462352E-003 -1.2611400E-002 -5.2856372E-003  
-8.8886211E-003 -9.9685400E-003 -6.1213738E-003  
-8.6102637E-003 -7.3433484E-003 -6.7858978E-003  
-8.6287487E-003 -4.7544825E-003 -7.3145718E-003  
-8.9510316E-003 -2.1883533E-003 -7.7116608E-003  
-9.5944823E-003 3.7765470E-004 -7.9586491E-003  
-1.0565417E-002 2.9448181E-003 -8.0425158E-003  
-1.1914989E-002 5.4895941E-003 -7.9494998E-003  
-1.3690331E-002 7.9300543E-003 -7.6657142E-003  
-1.5757715E-002 1.0403223E-002 -7.0953017E-003  
-1.7964915E-002 1.2394182E-002 -6.4024184E-003  
-2.0271971E-002 1.3899799E-002 -5.6122211E-003  
-2.2635830E-002 1.4987569E-002 -4.7427253E-003  
-2.5068701E-002 1.5651904E-002 -3.7975354E-003  
-2.7587000E-002 1.5921353E-002 -2.7668449E-003  
-3.0207153E-002 1.5743760E-002 -1.6510249E-003

-3.2910382E-002 1.5080990E-002 -4.4001830E-004  
-3.5635898E-002 1.3835173E-002 8.4234836E-004  
-3.8320030E-002 1.1982356E-002 1.7852835E-003  
-4.0489091E-002 9.8247182E-003 2.5162784E-003  
-4.2182148E-002 7.5011964E-003 3.0549639E-003  
-4.3456222E-002 5.0602155E-003 3.4144452E-003  
-4.4321904E-002 2.4914002E-003 3.6059962E-003  
-4.4819106E-002 -2.1778422E-004 3.6380358E-003  
-4.4931506E-002 -3.1021523E-003 3.4975075E-003  
-4.4540843E-002 -6.1582982E-003 3.1524243E-003  
-4.3516925E-002 -9.2682473E-003 2.5506952E-003  
-4.2281588E-002 -1.1686382E-002 1.6001432E-003  
-4.0776099E-002 -1.3669874E-002 5.7198377E-004  
-3.9075260E-002 -1.5239580E-002 -4.8217438E-004  
-3.7232142E-002 -1.6450506E-002 -1.5641022E-003  
-3.5248237E-002 -1.7307595E-002 -2.6712031E-003  
-3.3100931E-002 -1.7826683E-002 -3.8090571E-003  
-3.0787661E-002 -1.8023961E-002 -4.9885802E-003  
-2.8288454E-002 -1.7839198E-002 -6.2054719E-003  
-2.5662277E-002 -1.7101032E-002 -7.4218834E-003  
-2.1060862E-002 -1.3137510E-002 -1.0915949E-002  
-1.8699265E-002 -7.9551609E-003 -1.2986181E-002  
-1.8266734E-002 -3.6780850E-003 -1.3814697E-002  
-1.8850034E-002 -4.1995579E-004 -1.4221684E-002  
-2.0248288E-002 2.3352448E-003 -1.4535873E-002  
-2.2788500E-002 4.9754796E-003 -1.4719305E-002  
-2.7246201E-002 7.4577431E-003 -1.4206059E-002  
-3.3884363E-002 8.7900025E-003 -1.1978160E-002  
-3.9890484E-002 7.2223796E-003 -8.0649005E-003  
-4.1864606E-002 6.7358992E-004 -1.0233387E-002  
-3.9987067E-002 -8.1355875E-003 -1.1874717E-002  
-3.7406867E-002 -1.2433369E-002 -1.1656010E-002  
-3.5920025E-002 -1.3636045E-002 -1.1578390E-002  
-3.5252487E-002 -1.3889042E-002 -1.2110917E-002  
-3.5107595E-002 -1.3444316E-002 -1.3163055E-002  
-3.5303228E-002 -1.1728011E-002 -1.4701623E-002  
-3.5182693E-002 -7.3964797E-003 -1.6233535E-002  
6.2238999E-003 -1.4364031E-002 -6.7930923E-003  
4.0093189E-003 -1.3388330E-002 -6.0537554E-003  
1.9039162E-003 -1.2254128E-002 -5.6629210E-003  
7.2803331E-005 -1.0889017E-002 -5.4801159E-003  
-1.3801859E-003 -9.2380503E-003 -5.4448264E-003  
-2.4003019E-003 -7.2714095E-003 -5.5186837E-003  
-2.9664429E-003 -4.9195868E-003 -5.6757461E-003  
-3.1027723E-003 -2.1133818E-003 -5.8870599E-003  
-3.1394357E-003 9.3063400E-004 -6.4273167E-003  
-3.3695721E-003 3.4034321E-003 -7.8757952E-003  
-4.1046396E-003 5.3466242E-003 -1.0543779E-002  
-5.1578297E-003 7.1720019E-003 -1.2953382E-002  
-6.3038324E-003 9.1604121E-003 -1.4617405E-002  
-7.5694692E-003 1.1224819E-002 -1.5596930E-002  
-9.0038961E-003 1.3264271E-002 -1.5907661E-002  
-1.0627886E-002 1.5318050E-002 -1.5726642E-002  
-1.2486497E-002 1.7396715E-002 -1.5063520E-002  
-1.4542011E-002 1.9498442E-002 -1.3796709E-002  
-1.6721384E-002 2.1641704E-002 -1.1877498E-002  
-1.8863826E-002 2.3098601E-002 -9.5889123E-003  
-2.0844056E-002 2.4129937E-002 -7.1759476E-003  
-2.2754961E-002 2.4734713E-002 -4.7752646E-003  
-2.4678938E-002 2.4909533E-002 -2.4685656E-003



-2.6663940E-002 2.4645408E-002 -2.8897629E-004  
-2.8742094E-002 2.3949060E-002 1.7481543E-003  
-3.0912090E-002 2.2810865E-002 3.6462004E-003  
-3.3217680E-002 2.1245967E-002 5.3519724E-003  
-3.5615186E-002 1.9258657E-002 6.8964508E-003  
-3.8061694E-002 1.6308335E-002 8.1588840E-003  
-4.0171551E-002 1.3284816E-002 9.0445081E-003  
-4.1909553E-002 1.0190714E-002 9.5808506E-003  
-4.3264115E-002 7.0250187E-003 9.7932509E-003  
-4.4221693E-002 3.7821363E-003 9.6899743E-003  
-4.4740536E-002 4.3562175E-004 9.3283893E-003  
-4.4818063E-002 -3.0125081E-003 8.7082076E-003  
-4.4410739E-002 -6.5566762E-003 7.8667241E-003  
-4.3468485E-002 -1.0168381E-002 6.8552466E-003  
-4.2082133E-002 -1.2942653E-002 5.7855938E-003  
-4.0390619E-002 -1.5287184E-002 4.7589773E-003  
-3.8436742E-002 -1.7163337E-002 3.7441067E-003  
-3.6311802E-002 -1.8600992E-002 2.6521478E-003  
-3.4011645E-002 -1.9600389E-002 1.4995838E-003  
-3.1544279E-002 -2.0180821E-002 2.5183182E-004  
-2.8911357E-002 -2.0354673E-002 -1.0919250E-003  
-2.6101308E-002 -2.0113480E-002 -2.5395261E-003  
-2.3105893E-002 -1.9450145E-002 -4.0661773E-003  
-2.0564884E-002 -1.7851943E-002 -5.6577760E-003  
-1.8440062E-002 -1.5977400E-002 -6.9898406E-003  
-1.6780226E-002 -1.3853209E-002 -8.0871293E-003  
-1.5573249E-002 -1.1522276E-002 -8.9966722E-003  
-1.4859005E-002 -8.9919877E-003 -9.7632685E-003  
-1.4584117E-002 -6.2691112E-003 -1.0457167E-002  
-1.4777938E-002 -3.3228316E-003 -1.1001562E-002  
-1.5429889E-002 -1.5036909E-004 -1.1349589E-002  
-1.6548295E-002 3.2328841E-003 -1.1357245E-002  
-1.8196782E-002 5.8597595E-003 -1.1069008E-002  
-1.9981486E-002 8.0169439E-003 -1.0564784E-002  
-2.1887300E-002 9.7044411E-003 -9.9313713E-003  
-2.3916003E-002 1.0928960E-002 -9.1950753E-003  
-2.6071265E-002 1.1694644E-002 -8.3875549E-003  
-2.8353142E-002 1.2000540E-002 -7.4930834E-003  
-3.0777615E-002 1.1867852E-002 -6.5588028E-003  
-3.3354059E-002 1.1289277E-002 -5.5751379E-003  
-3.6047675E-002 1.0251747E-002 -4.4711204E-003  
-3.8043223E-002 9.0330178E-003 -3.6976629E-003  
-3.9706516E-002 7.5960920E-003 -3.0575587E-003  
-4.1087150E-002 5.9928632E-003 -2.6004197E-003  
-4.2139353E-002 4.1843473E-003 -2.2765922E-003  
-4.2905979E-002 2.2033481E-003 -2.1287840E-003  
-4.3398219E-002 3.6569616E-005 -2.1546165E-003  
-4.3619987E-002 -2.3229635E-003 -2.3648801E-003  
-4.3432513E-002 -4.8929724E-003 -2.6603310E-003  
-4.2849202E-002 -7.6238170E-003 -3.0403784E-003  
-4.1803077E-002 -9.7370599E-003 -3.6495055E-003  
-4.0565851E-002 -1.1494134E-002 -4.2691953E-003  
-3.9167866E-002 -1.2877617E-002 -4.9344568E-003  
-3.7691343E-002 -1.3932639E-002 -5.7139384E-003  
-3.6101591E-002 -1.4642594E-002 -6.5766635E-003  
-3.4418429E-002 -1.5025869E-002 -7.5456448E-003  
-3.2653568E-002 -1.5110841E-002 -8.6483674E-003  
-3.0776251E-002 -1.4853366E-002 -9.8518576E-003  
-2.8775170E-002 -1.4223368E-002 -1.1100344E-002  
-2.5665595E-002 -1.0979905E-002 -1.3870010E-002

-2.3455933E-002 -7.4521609E-003 -1.5344635E-002  
-2.2483303E-002 -4.2938780E-003 -1.5722384E-002  
-2.2567282E-002 -1.7187432E-003 -1.5921533E-002  
-2.3635998E-002 4.1616089E-004 -1.6007002E-002  
-2.5726889E-002 2.2931543E-003 -1.6392483E-002  
-2.9110393E-002 4.1669386E-003 -1.6705085E-002  
-3.3630366E-002 5.2653835E-003 -1.4653404E-002  
-3.8339682E-002 5.0911570E-003 -1.1923620E-002  
-3.8957610E-002 3.1484777E-004 -1.4082690E-002  
-3.8731787E-002 -4.6437795E-003 -1.5454345E-002  
-3.7450260E-002 -8.0753688E-003 -1.5287173E-002  
-3.6601032E-002 -9.8233718E-003 -1.5087355E-002  
-3.6025854E-002 -1.0411501E-002 -1.5161992E-002  
-3.5684078E-002 -9.9367095E-003 -1.5492116E-002  
-3.5396894E-002 -8.4029778E-003 -1.5968392E-002  
-3.5254572E-002 -5.6210249E-003 -1.6910229E-002  
8.9661641E-003 -2.9817631E-003 1.8236741E-002  
1.2616769E-002 -4.8225367E-003 2.0689376E-002  
1.6564926E-002 -6.3726392E-003 2.2489770E-002  
2.0438761E-002 -7.6988645E-003 2.3850965E-002  
2.4134897E-002 -8.8139975E-003 2.5284245E-002  
2.7794540E-002 -9.7525121E-003 2.6233116E-002  
3.1361324E-002 -1.0431585E-002 2.7037102E-002  
3.4902899E-002 -1.1038246E-002 2.7489835E-002  
3.8384402E-002 -1.1347387E-002 2.7636914E-002  
4.1751768E-002 -1.1500167E-002 2.7458581E-002  
  
4.0549316E-002 -8.8636915E-003 1.9263393E-002  
2.3076436E-002 -2.8479888E-002 -9.1559695E-003  
2.4030271E-002 -2.9079038E-002 -1.1161612E-002  
2.5401080E-002 -3.0171599E-002 -1.2496411E-002  
2.6956437E-002 -3.1295270E-002 -1.3503079E-002  
2.8755119E-002 -3.2496607E-002 -1.3967597E-002  
3.0795831E-002 -3.3795353E-002 -1.4243881E-002  
3.3042313E-002 -3.5205701E-002 -1.3863737E-002  
3.5507652E-002 -3.6728180E-002 -1.3227820E-002  
3.8316733E-002 -3.8333583E-002 -1.2351989E-002  
4.1170700E-002 -4.0034942E-002 -1.0625255E-002  
4.3861511E-002 -4.1317458E-002 -8.8114546E-003  
4.6417930E-002 -4.1736952E-002 -6.7176601E-003  
4.8357647E-002 -4.1832021E-002 -4.2812309E-003  
5.0059171E-002 -4.1556712E-002 -1.5128711E-003  
5.1247456E-002 -4.1163545E-002 4.0638410E-004  
5.1990436E-002 -4.0272212E-002 2.9777651E-003  
5.2783150E-002 -3.8959458E-002 6.4149948E-003  
5.3018320E-002 -3.7301647E-002 9.5572811E-003  
5.2858131E-002 -3.5282533E-002 1.2891890E-002  
5.2090481E-002 -3.1976062E-002 1.5695418E-002  
5.0765110E-002 -2.8872506E-002 1.7971850E-002  
4.9055541E-002 -2.5803485E-002 1.9752718E-002  
4.6894081E-002 -2.2868206E-002 2.0905196E-002  
4.4140096E-002 -2.0274227E-002 2.1393801E-002  
4.1047209E-002 -1.7472418E-002 2.1383443E-002  
3.7587589E-002 -1.4682996E-002 2.0816969E-002  
3.3732143E-002 -1.1822310E-002 1.9750924E-002  
2.9416675E-002 -9.1597881E-003 1.8188878E-002  
2.7237910E-002 -7.7453139E-003 1.6781662E-002  
2.5271202E-002 -6.5730558E-003 1.5469113E-002  
2.3626661E-002 -6.0945058E-003 1.4114617E-002  
2.2380884E-002 -6.3642443E-003 1.2660165E-002

2.1411224E-002 -7.1541171E-003 1.1187681E-002  
2.0805503E-002 -8.6140509E-003 9.6911827E-003  
2.0471483E-002 -1.0658572E-002 8.1585697E-003  
2.0413916E-002 -1.3307858E-002 6.5120535E-003  
2.0983263E-002 -1.6653295E-002 5.0166953E-003  
2.2246944E-002 -1.8621699E-002 4.3998190E-003  
2.3417559E-002 -2.0455250E-002 3.7721227E-003  
2.4199699E-002 -2.2104899E-002 2.7245964E-003  
2.4742569E-002 -2.3581791E-002 1.4244428E-003  
2.4956634E-002 -2.4868798E-002 -1.8231179E-004  
2.4934175E-002 -2.6028905E-002 -1.9799536E-003  
2.4588183E-002 -2.6914703E-002 -4.1066962E-003  
2.3843325E-002 -2.7491768E-002 -6.6791947E-003  
1.5508122E-002 -2.6766773E-002 -1.2870696E-002  
1.7566698E-002 -2.8030106E-002 -1.5010024E-002  
1.9901872E-002 -2.9216708E-002 -1.6493813E-002  
2.2271840E-002 -3.0350675E-002 -1.7497219E-002  
2.4679190E-002 -3.1785019E-002 -1.8356403E-002  
2.7104288E-002 -3.3031860E-002 -1.8708140E-002  
2.9604734E-002 -3.4420238E-002 -1.8706129E-002  
3.2124483E-002 -3.5728739E-002 -1.8171853E-002  
3.4742540E-002 -3.7212746E-002 -1.7362301E-002  
3.7467711E-002 -3.8851197E-002 -1.6248070E-002  
3.9318278E-002 -3.9966581E-002 -1.5179090E-002  
4.1152913E-002 -4.0936942E-002 -1.3986433E-002  
4.2958804E-002 -4.1868697E-002 -1.2780195E-002  
4.4709022E-002 -4.2597738E-002 -1.1396358E-002  
4.6385427E-002 -4.3125474E-002 -9.8292842E-003  
4.8038943E-002 -4.3550126E-002 -8.1794349E-003  
4.9556437E-002 -4.3639392E-002 -6.3254135E-003  
5.1180883E-002 -4.3812047E-002 -4.4279313E-003  
5.2580905E-002 -4.3555077E-002 -2.3282006E-003  
5.3616777E-002 -4.3155656E-002 -2.2472107E-004  
5.4350136E-002 -4.2463300E-002 1.8494719E-003  
5.4973704E-002 -4.1727363E-002 3.8508027E-003  
5.5410781E-002 -4.0874164E-002 5.7870261E-003  
5.5622099E-002 -3.9871580E-002 7.6331110E-003  
5.5936931E-002 -3.8946751E-002 9.4893252E-003  
5.6033628E-002 -3.7870026E-002 1.1276183E-002  
5.6012796E-002 -3.6743402E-002 1.3015956E-002  
5.5806350E-002 -3.5478978E-002 1.4679053E-002  
5.5549726E-002 -3.3215273E-002 1.6890323E-002  
5.4873096E-002 -3.0908747E-002 1.8802853E-002  
5.3812652E-002 -2.8389272E-002 2.0706587E-002  
5.2204068E-002 -2.5536285E-002 2.2308900E-002  
4.9892644E-002 -2.2424135E-002 2.3277654E-002  
4.7047763E-002 -1.9037010E-002 2.3896303E-002  
4.3605646E-002 -1.5392443E-002 2.3747796E-002  
3.9586856E-002 -1.1280351E-002 2.3648652E-002  
3.5313321E-002 -7.3218908E-003 2.4049408E-002  
2.0994796E-002 2.3218605E-002 5.2434296E-003  
2.1760580E-002 2.4076025E-002 2.8407078E-003  
2.3039236E-002 2.5112054E-002 9.1588029E-004  
2.4803705E-002 2.5971753E-002 -3.8137499E-004  
2.6557411E-002 2.6500483E-002 -1.3552555E-003  
2.8305110E-002 2.6961300E-002 -2.2509045E-003  
3.0102009E-002 2.7255641E-002 -2.8697929E-003  
3.1913607E-002 2.7417144E-002 -3.1721098E-003  
3.3809166E-002 2.7523844E-002 -3.2126460E-003  
3.5796906E-002 2.7537465E-002 -3.2219843E-003

3.7847972E-002 2.6735569E-002 -2.8153204E-003  
4.0148621E-002 2.6435034E-002 -2.7967968E-003  
4.2099757E-002 2.5684038E-002 -2.3001264E-003  
4.3779468E-002 2.4924733E-002 -1.5278262E-003  
4.5430578E-002 2.4099563E-002 -7.4861266E-004  
4.7074565E-002 2.3130336E-002 -9.8211276E-006  
4.8497656E-002 2.2069965E-002 9.5660519E-004  
4.9891611E-002 2.0800575E-002 1.9235558E-003  
5.1000598E-002 1.9441410E-002 3.0827313E-003  
5.2624442E-002 1.6250879E-002 4.9399709E-003  
5.3630402E-002 1.3060461E-002 6.8126841E-003  
5.3674197E-002 1.0455539E-002 8.7954146E-003  
5.3328325E-002 8.0707438E-003 1.0576665E-002  
5.2507575E-002 5.8030783E-003 1.2212374E-002  
5.1090379E-002 3.6520104E-003 1.3756788E-002  
4.8924679E-002 1.7434448E-003 1.5373915E-002  
4.5855163E-002 5.0216476E-004 1.7033843E-002  
4.2190301E-002 -1.3416370E-004 1.8600996E-002  
3.7155283E-002 -9.4825362E-004 1.8745477E-002  
3.2704816E-002 -6.3375068E-004 1.8845279E-002  
2.8913142E-002 1.2375732E-004 1.8840791E-002  
2.5717560E-002 1.1535095E-003 1.8705814E-002  
2.3070931E-002 2.4233518E-003 1.8415272E-002  
2.0953223E-002 3.9110498E-003 1.7932297E-002  
1.9068205E-002 5.4801619E-003 1.7146378E-002  
1.7938703E-002 7.8044988E-003 1.6234592E-002  
1.8334460E-002 1.0687799E-002 1.6115343E-002  
1.9509008E-002 1.2283565E-002 1.5951484E-002  
2.0387856E-002 1.3724129E-002 1.5664096E-002  
2.1102201E-002 1.5148732E-002 1.5110941E-002  
2.1629307E-002 1.6543931E-002 1.4294782E-002  
2.2057756E-002 1.7973326E-002 1.3226089E-002  
2.2363399E-002 1.9421882E-002 1.1832603E-002  
2.2208966E-002 2.0715144E-002 9.9385106E-003  
2.1670076E-002 2.1868323E-002 7.7055097E-003  
1.2269398E-002 2.6459201E-002 2.4263330E-003  
1.3901449E-002 2.7695885E-002 5.8282688E-004  
1.5944447E-002 2.8508903E-002 -9.9030818E-004  
1.8041553E-002 2.9152498E-002 -2.3531649E-003  
2.0178715E-002 2.9619941E-002 -3.4929075E-003  
2.2277627E-002 2.9978026E-002 -4.4146644E-003  
2.4317068E-002 3.0322225E-002 -5.1606105E-003  
2.6378017E-002 3.0713234E-002 -5.7189823E-003  
2.8492970E-002 3.0868628E-002 -6.0443322E-003  
3.0641287E-002 3.0994622E-002 -6.1844320E-003  
3.2473822E-002 3.0996703E-002 -6.2195371E-003  
3.4396100E-002 3.0589771E-002 -6.1615206E-003  
3.6205001E-002 3.0131072E-002 -5.7031652E-003  
3.8098431E-002 2.9729185E-002 -5.3635445E-003  
4.0074544E-002 2.9083622E-002 -5.0730789E-003  
4.2048901E-002 2.8532578E-002 -4.5978766E-003  
4.3903282E-002 2.7635279E-002 -3.9107844E-003  
4.5920005E-002 2.6711688E-002 -3.3135939E-003  
4.7782047E-002 2.5519985E-002 -2.5198672E-003  
4.9299203E-002 2.4357882E-002 -1.4303571E-003  
5.0806721E-002 2.3232563E-002 -3.8096353E-004  
5.2074797E-002 2.1933140E-002 6.9734454E-004  
5.3251329E-002 2.0664133E-002 1.8101563E-003  
5.4074089E-002 1.9421285E-002 2.9918501E-003  
5.4970913E-002 1.8023522E-002 4.1078472E-003

5.5976012E-002 1.6456727E-002 5.1204842E-003  
5.6497006E-002 1.4934124E-002 6.2720306E-003  
5.6789006E-002 1.3377998E-002 7.3508171E-003  
5.6707217E-002 9.8611080E-003 9.0705774E-003  
5.6570816E-002 6.5026598E-003 1.1132752E-002  
5.5308765E-002 3.5486059E-003 1.2962925E-002  
5.3482803E-002 9.4458477E-004 1.4738683E-002  
5.1153103E-002 -1.4354304E-003 1.6595986E-002  
4.8215998E-002 -3.4535544E-003 1.8509338E-002  
4.4514600E-002 -5.0441211E-003 2.0428140E-002  
4.0196066E-002 -6.3323141E-003 2.2096283E-002  
3.5313321E-002 -7.3218908E-003 2.4049408E-002  
2.6801943E-002 -6.2207328E-003 -1.5306175E-002  
2.7341823E-002 -5.7052133E-003 -1.6529809E-002  
2.8080335E-002 -4.8007537E-003 -1.7479202E-002  
2.8833227E-002 -3.5730405E-003 -1.8303238E-002  
2.9554881E-002 -2.0050397E-003 -1.8996232E-002  
3.0319947E-002 -7.8895028E-005 -1.9377718E-002  
3.1024942E-002 2.1365932E-003 -1.9822767E-002  
3.1744224E-002 4.7059331E-003 -2.0154182E-002  
3.2514039E-002 7.6071294E-003 -2.0222973E-002  
3.3277662E-002 1.0815170E-002 -1.9976983E-002  
3.4461182E-002 1.3385831E-002 -1.9538468E-002  
3.5591105E-002 1.5609575E-002 -1.8721372E-002  
3.6637220E-002 1.7405810E-002 -1.7624339E-002  
3.7544206E-002 1.8867010E-002 -1.6509227E-002  
3.8222749E-002 2.0534837E-002 -1.5463656E-002  
3.8888849E-002 2.1221984E-002 -1.3945926E-002  
3.9407613E-002 2.1468664E-002 -1.2403554E-002  
3.9937340E-002 2.2154352E-002 -1.0565959E-002  
4.0102103E-002 2.1602869E-002 -8.8578062E-003  
4.0416255E-002 2.1663382E-002 -7.3853833E-003  
4.0518257E-002 2.1423069E-002 -6.0175902E-003  
4.0522857E-002 2.1083509E-002 -4.6118560E-003  
4.0414668E-002 2.0631074E-002 -3.3918520E-003  
4.0170439E-002 2.0187086E-002 -2.2714967E-003  
3.9847007E-002 1.9505877E-002 -1.2934822E-003  
3.9482226E-002 1.8925518E-002 -3.9321750E-004  
3.9021261E-002 1.8453335E-002 4.5989511E-004  
3.8494075E-002 1.7942690E-002 1.3005362E-003  
3.6913326E-002 1.7279299E-002 3.1769936E-003  
3.5288725E-002 1.6475176E-002 4.6330930E-003  
3.3752812E-002 1.5705024E-002 6.0671195E-003  
3.2161149E-002 1.4624523E-002 7.1545856E-003  
3.0539033E-002 1.3438026E-002 8.0588267E-003  
2.8909666E-002 1.1948577E-002 8.6175030E-003  
2.7288418E-002 1.0314322E-002 8.9431998E-003  
2.5736175E-002 8.4834513E-003 9.0344381E-003  
2.4257100E-002 6.4301901E-003 8.5318271E-003  
2.3582307E-002 5.0009484E-003 7.9645755E-003  
2.2999559E-002 3.6581355E-003 7.2780570E-003  
2.2571447E-002 2.2860521E-003 6.4427498E-003  
2.2267608E-002 9.1947445E-004 5.5340818E-003  
2.1995615E-002 -3.9538319E-004 4.6012101E-003  
2.1671005E-002 -1.5995720E-003 3.6739530E-003  
2.1462483E-002 -2.8019319E-003 2.6447158E-003  
2.1317023E-002 -4.0521876E-003 1.4852174E-003  
2.2254973E-002 -5.1525680E-003 1.2790055E-004  
2.3263317E-002 -5.1213128E-003 -1.0314687E-003  
2.4406103E-002 -4.8402344E-003 -2.2493024E-003

2.5452669E-002 -4.5557624E-003 -3.5983196E-003  
2.6325351E-002 -4.3941703E-003 -5.1136572E-003  
2.6879604E-002 -4.4928370E-003 -6.8109473E-003  
2.7059994E-002 -4.8542997E-003 -8.7237896E-003  
2.6802118E-002 -5.4667372E-003 -1.0909969E-002  
2.6463513E-002 -5.9989278E-003 -1.3250656E-002  
2.4851615E-002 -1.1498732E-002 -1.9206984E-002  
2.6151048E-002 -1.0328447E-002 -2.0360807E-002  
2.7389578E-002 -9.0010779E-003 -2.1352734E-002  
2.8515401E-002 -7.4980998E-003 -2.2161515E-002  
2.9478105E-002 -5.8338250E-003 -2.2843067E-002  
3.0339809E-002 -3.9596579E-003 -2.3339479E-002  
3.1063118E-002 -1.9088711E-003 -2.3644172E-002  
3.1672897E-002 3.3006487E-004 -2.3709790E-002  
3.2130219E-002 2.7185171E-003 -2.3818864E-002  
3.2534657E-002 5.2910377E-003 -2.3794857E-002  
3.3218383E-002 7.9027575E-003 -2.3667340E-002  
3.3995697E-002 1.0363617E-002 -2.3353472E-002  
3.4740376E-002 1.2658105E-002 -2.2930255E-002  
3.5585872E-002 1.4813328E-002 -2.2187608E-002  
3.6550501E-002 1.6818876E-002 -2.1502881E-002  
3.7398074E-002 1.8698364E-002 -2.0259462E-002  
3.8316197E-002 2.0388013E-002 -1.8819186E-002  
3.9621666E-002 2.2017604E-002 -1.7486637E-002  
4.0392523E-002 2.3372072E-002 -1.5467600E-002  
3.6249366E-002 2.4542820E-002 -1.1143572E-002  
3.9293541E-002 2.5106801E-002 -9.8693880E-003  
4.0827500E-002 2.5034871E-002 -8.5758009E-003  
4.1536609E-002 2.4722237E-002 -7.0275600E-003  
4.2642250E-002 2.3758554E-002 -6.0661891E-003  
4.2788868E-002 2.3334760E-002 -4.1750084E-003  
4.2973083E-002 2.2972332E-002 -2.2308503E-003  
4.3374588E-002 2.2612772E-002 -3.2498681E-004  
4.2633254E-002 2.1393995E-002 1.5665087E-003  
4.0881862E-002 2.0925149E-002 3.6775799E-003  
3.9308640E-002 2.0600286E-002 5.8694477E-003  
3.7612637E-002 1.9823157E-002 7.9633209E-003  
3.5709265E-002 1.8692847E-002 9.6009443E-003  
3.3734424E-002 1.7187904E-002 1.1006004E-002  
3.1553485E-002 1.5414171E-002 1.2065639E-002  
2.9214499E-002 1.3332700E-002 1.3008007E-002  
2.6778822E-002 1.0922379E-002 1.3941605E-002  
2.4255982E-002 8.1654933E-003 1.4168394E-002  
1.2142693E-002 6.6102194E-004 -5.3161760E-003  
1.0883653E-002 1.1166366E-003 -5.6777051E-003  
9.7268391E-003 1.5244371E-003 -6.2101534E-003  
8.5568482E-003 1.6795815E-003 -6.6663561E-003  
7.4031131E-003 1.4390778E-003 -7.2772360E-003  
6.6248300E-003 1.8324422E-003 -7.0044403E-003  
5.6173472E-003 2.4563041E-003 -7.8695074E-003  
4.8632025E-003 1.4632724E-003 -7.1539809E-003  
4.1518118E-003 9.8451110E-004 -7.0213405E-003  
3.1755009E-003 5.0613999E-004 -7.3252305E-003  
2.4199023E-003 -3.2192993E-004 -6.8919415E-003  
1.5830118E-003 -1.0455810E-003 -6.7921586E-003  
8.2001729E-004 -1.6969098E-003 -6.9427952E-003  
3.0830490E-004 -2.4556090E-003 -7.1129759E-003  
4.6399140E-005 -3.3225928E-003 -7.3745970E-003  
1.6117805E-005 -4.2894127E-003 -7.6037318E-003  
1.4765065E-004 -5.3743670E-003 -7.9151624E-003

5.5805250E-004 -6.5535360E-003 -8.2251802E-003  
1.3420181E-003 -7.7346647E-003 -8.3939098E-003  
2.3228670E-003 -8.6239850E-003 -8.7784226E-003  
3.2922292E-003 -9.2945212E-003 -9.1286090E-003  
4.2721356E-003 -9.7196988E-003 -9.3969617E-003  
5.2830576E-003 -9.8101056E-003 -9.3860669E-003  
6.2142629E-003 -9.7923035E-003 -9.6155262E-003  
7.1304353E-003 -9.4430464E-003 -9.6161995E-003  
8.0556103E-003 -8.9045941E-003 -9.6510853E-003  
8.9524883E-003 -8.0449382E-003 -9.6315343E-003  
9.8101146E-003 -7.0771316E-003 -9.3022627E-003  
1.0489404E-002 -6.4286302E-003 -8.9863949E-003  
1.1024386E-002 -5.6976628E-003 -8.6477381E-003  
1.1436056E-002 -4.9416317E-003 -8.2655465E-003  
1.1835040E-002 -4.1256544E-003 -7.9481571E-003  
1.2149440E-002 -3.2755285E-003 -7.5526219E-003  
1.2350686E-002 -2.3839946E-003 -7.0872882E-003  
1.2325471E-002 -1.4529156E-003 -6.4373278E-003  
1.2203338E-002 -4.8564114E-004 -5.7487881E-003  
-3.0809147E-002 1.8914448E-002 1.9890830E-002  
-3.3126218E-002 2.0854465E-002 1.8797585E-002  
-3.4899205E-002 2.2510455E-002 1.8566397E-002  
-3.7620384E-002 2.3860949E-002 1.6716713E-002  
-3.8566176E-002 2.3668916E-002 1.5214475E-002  
-3.9475583E-002 2.3017919E-002 1.3213086E-002  
-3.9648834E-002 2.1319541E-002 1.0507396E-002  
-3.9800623E-002 -1.0441660E-002 1.7213366E-002  
-4.1822125E-002 -1.1101844E-002 1.6260157E-002  
-4.3312677E-002 -1.1483856E-002 1.5215585E-002  
-4.4307883E-002 -1.1665817E-002 1.4142295E-002  
-4.5137199E-002 -1.1641486E-002 1.1678599E-002  
-4.5136348E-002 -1.1460438E-002 1.0166462E-002  
-4.4840747E-002 -1.1119890E-002 8.3423666E-003  
-1.5252615E-002 -1.9736097E-002 9.1189469E-003  
-1.5540698E-002 -2.0995371E-002 7.6368342E-003  
-1.5736226E-002 -2.2030791E-002 6.3891178E-003  
-1.6112109E-002 -2.2689542E-002 5.1417660E-003  
-1.7341655E-002 -2.2877020E-002 2.6213745E-003  
-1.8181729E-002 -2.2476880E-002 1.3104622E-003  
-1.9207917E-002 -2.1749210E-002 -4.6752921E-005  
-3.4319102E-002 1.1421630E-002 4.1001238E-003  
-3.5829397E-002 1.2443726E-002 2.5997990E-003  
-3.6866600E-002 1.2992170E-002 1.1764762E-003  
-3.7596812E-002 1.3318368E-002 -1.1393645E-004  
-3.8116896E-002 1.2778005E-002 -2.7389978E-003  
-3.8028016E-002 1.2123588E-002 -4.1772297E-003  
-3.7638491E-002 1.1099428E-002 -5.7334399E-003  
-3.9913198E-002 -5.9428347E-003 5.6604035E-003  
-4.0795469E-002 -7.6749109E-003 2.3097039E-003  
-4.3088628E-002 -9.7030790E-003 2.2711051E-003  
-4.4065769E-002 -1.0270102E-002 -2.4410810E-004  
-4.4082956E-002 -1.0215040E-002 -1.4285881E-003  
-4.4115773E-002 -1.0141996E-002 -2.7677452E-003  
-4.3759597E-002 -9.7886676E-003 -4.3507912E-003  
-2.4669951E-002 -1.5000054E-002 -1.5749258E-003  
-2.5550998E-002 -1.4782876E-002 -3.4365434E-003  
-2.3630036E-002 -1.8229685E-002 -3.9388120E-003  
-2.4227789E-002 -1.8991052E-002 -6.2239706E-003  
-2.4664036E-002 -1.8833938E-002 -7.2729418E-003  
-2.5180523E-002 -1.8491158E-002 -8.4037730E-003

-2.5852508E-002 -1.7747793E-002 -9.5767547E-003  
1.1209955E-002 1.3618505E-002 5.3137161E-004  
7.8789762E-003 1.5218515E-002 -5.3493787E-004  
4.2200533E-003 1.9644759E-002 -1.8831331E-003  
4.7765100E-003 1.6235608E-002 3.0512497E-003  
2.9212101E-003 1.6480313E-002 4.3803007E-003  
9.5993495E-004 1.6924309E-002 5.4916809E-003  
-1.3017405E-003 1.7376820E-002 6.3491518E-003  
-3.5913069E-003 1.7601771E-002 7.4403824E-003  
-5.9341705E-003 1.7569045E-002 8.8033779E-003  
-8.4236598E-003 1.7871826E-002 9.9938830E-003  
-1.0858370E-002 1.8161412E-002 1.0637236E-002  
-1.3074553E-002 1.8051152E-002 1.1361154E-002  
-1.5263325E-002 1.7992686E-002 1.1939282E-002  
-1.7307354E-002 1.7586374E-002 1.2613818E-002  
-1.9338021E-002 1.7349077E-002 1.3090449E-002  
-2.1232199E-002 1.6735847E-002 1.3650378E-002  
-2.3100532E-002 1.6136742E-002 1.4213835E-002  
-2.4836443E-002 1.5264651E-002 1.4688992E-002  
-2.6494464E-002 1.4232400E-002 1.5272733E-002  
-2.9054682E-002 1.1989662E-002 1.5677843E-002  
-3.1099896E-002 9.7366010E-003 1.5920417E-002  
-3.3025489E-002 7.6118058E-003 1.5985059E-002  
-3.4327619E-002 5.2540091E-003 1.5964797E-002  
-3.5380030E-002 2.7550882E-003 1.5859289E-002  
-3.5980997E-002 3.1894970E-004 1.5679650E-002  
-3.6225253E-002 -2.2362715E-003 1.5379472E-002  
-3.5958049E-002 -4.9475522E-003 1.4907324E-002  
-3.4902705E-002 -7.5820622E-003 1.4409476E-002  
-3.3579506E-002 -9.7139781E-003 1.3865380E-002  
-3.2203126E-002 -1.1513569E-002 1.3104289E-002  
-3.0597952E-002 -1.2917453E-002 1.2561058E-002  
-2.8912126E-002 -1.4048715E-002 1.1901777E-002  
-2.7050581E-002 -1.4729814E-002 1.1343538E-002  
-2.4972263E-002 -1.5042743E-002 1.0771117E-002  
-2.2814360E-002 -1.5013640E-002 1.0253041E-002  
-2.0486561E-002 -1.4777103E-002 9.6187572E-003  
-1.8031600E-002 -1.4099019E-002 9.0292180E-003  
-1.5098799E-002 -1.1836841E-002 2.8921439E-003  
-1.3189568E-002 -6.5575653E-003 -1.1426187E-004  
-1.4207432E-002 -1.6783392E-003 1.9803140E-003  
-1.5210709E-002 1.1779175E-003 1.8546702E-003  
-1.6575563E-002 3.1099717E-003 1.3884724E-003  
-1.8686635E-002 4.5661278E-003 9.6077218E-004  
-2.1761726E-002 5.8920042E-003 9.5103611E-004  
-2.5941788E-002 6.7251570E-003 1.0067703E-003  
-3.0685846E-002 5.7572243E-003 2.8532320E-003  
-3.3960613E-002 2.8562088E-003 -7.6860832E-005  
-3.5403427E-002 -2.1552877E-003 -4.7672751E-004  
-3.5045077E-002 -3.6515881E-003 1.6765521E-003  
-3.3453396E-002 -4.2623997E-003 1.0619293E-003  
-3.2400164E-002 -5.4574952E-003 4.9633584E-004  
-3.1082901E-002 -6.6099763E-003 -3.7580380E-004  
-2.9634062E-002 -8.2574766E-003 -2.2099104E-003  
-2.7003718E-002 -8.6480476E-003 -4.0326840E-003  
-2.4636473E-002 -7.1023322E-003 -3.1504757E-003  
-2.6249655E-002 -4.3816762E-003 -8.5464777E-003  
-2.7576463E-002 -2.7479033E-003 -1.1150179E-002  
-2.8747924E-002 -4.1435911E-004 -1.0494824E-002  
-2.8058683E-002 5.2214360E-004 -7.0901850E-003



-2.7866062E-002 1.1813044E-003 -7.3577665E-003  
-2.7210959E-002 2.5522285E-003 -8.9238547E-003  
-2.1059828E-002 6.6373618E-003 -9.4405478E-003  
-2.9589704E-002 -2.7434627E-004 -1.6569907E-002  
7.2420550E-005 2.4585492E-002 8.4518116E-003  
-1.7122187E-003 2.5275080E-002 8.3917389E-003  
-3.9510108E-003 2.5698972E-002 8.6979680E-003  
-6.3990027E-003 2.5734711E-002 9.4525801E-003  
-9.0832180E-003 2.5309368E-002 1.0496995E-002  
-1.2052954E-002 2.4387720E-002 1.1802798E-002  
-1.5450105E-002 2.3004232E-002 1.3366191E-002  
-1.9281222E-002 2.1208221E-002 1.5248528E-002  
-2.3676348E-002 1.8995072E-002 1.7082850E-002  
-2.8425022E-002 1.6369372E-002 1.9160942E-002  
-3.1207609E-002 1.4410535E-002 2.0085221E-002  
-3.3514150E-002 1.2198569E-002 2.0768145E-002  
-3.5538493E-002 9.8605622E-003 2.0869795E-002  
-3.7012135E-002 7.2286502E-003 2.0913231E-002  
-3.8108510E-002 4.4014281E-003 2.0522976E-002  
-3.8795804E-002 1.3493631E-003 1.9747270E-002  
-3.8980776E-002 -1.9922249E-003 1.8801051E-002  
-3.8513507E-002 -5.6680605E-003 1.7983608E-002  
-3.7501772E-002 -9.5475697E-003 1.7154809E-002  
-3.5639376E-002 -1.2073794E-002 1.6499210E-002  
-3.3569458E-002 -1.4171821E-002 1.6035959E-002  
-3.1393008E-002 -1.5884857E-002 1.5495648E-002  
-2.9039892E-002 -1.7271251E-002 1.4953541E-002  
-2.6617816E-002 -1.8209478E-002 1.4177318E-002  
-2.4074409E-002 -1.8702105E-002 1.3303804E-002  
-2.1349642E-002 -1.8838927E-002 1.2388829E-002  
-1.8490245E-002 -1.8572347E-002 1.1393213E-002  
-1.5683820E-002 -1.7866989E-002 1.0041077E-002  
-1.2251512E-002 -1.4665546E-002 8.0422556E-003  
-9.9518951E-003 -1.1437402E-002 6.1279298E-003  
-8.5647377E-003 -8.2475679E-003 4.4863342E-003  
-8.2122020E-003 -5.1277378E-003 3.0383183E-003  
-8.7611545E-003 -2.0306547E-003 1.9497574E-003  
-1.0172044E-002 1.0828107E-003 1.2756850E-003  
-1.2506096E-002 4.2013397E-003 9.6904712E-004  
-1.5739842E-002 7.3599194E-003 1.0292072E-003  
-1.9795488E-002 1.0593177E-002 1.5818054E-003  
-2.3175027E-002 1.0967852E-002 2.3881317E-003  
-2.6194053E-002 1.1041532E-002 3.2676185E-003  
-2.8962380E-002 1.0757747E-002 3.8570190E-003  
-3.1376809E-002 1.0193904E-002 4.4932291E-003  
-3.3551574E-002 9.2781875E-003 4.7716338E-003  
-3.5374659E-002 8.0489315E-003 5.0742750E-003  
-3.6906090E-002 6.4350173E-003 5.0577997E-003  
-3.8130056E-002 4.5441212E-003 5.0665723E-003  
-3.9075233E-002 2.3241293E-003 4.9088025E-003  
-3.9099244E-002 4.5694385E-004 4.9089952E-003  
-3.8994441E-002 -1.2596873E-003 4.7177569E-003  
-3.8661732E-002 -3.0363659E-003 4.6002337E-003  
-3.8118487E-002 -4.6752859E-003 4.3588636E-003  
-3.7273682E-002 -6.3222252E-003 4.0250208E-003  
-3.6353881E-002 -7.7168308E-003 3.5648661E-003  
-3.5472525E-002 -9.2750498E-003 2.8759080E-003  
-3.3904016E-002 -1.0547342E-002 2.8457131E-003  
-3.2200059E-002 -1.1714571E-002 2.4786818E-003  
-3.0274791E-002 -1.2452434E-002 1.5537398E-003

-2.8527921E-002 -1.2833041E-002 6.5601459E-004  
-2.6932743E-002 -1.2861105E-002 -2.4842747E-004  
-2.5390179E-002 -1.2631937E-002 -9.5543074E-004  
-2.4001414E-002 -1.2041438E-002 -1.5950569E-003  
-2.2775236E-002 -1.1106006E-002 -2.2620667E-003  
-2.1814731E-002 -9.7677402E-003 -3.0108258E-003  
-2.1034719E-002 -8.0536353E-003 -3.7623647E-003  
-2.0597837E-002 -6.0418331E-003 -4.7722425E-003  
-2.3041338E-002 -3.3607551E-003 -5.6074559E-003  
-2.4803347E-002 -1.3607855E-003 -7.9211421E-003  
-2.5202566E-002 8.5696344E-004 -5.8269016E-003  
-2.6577074E-002 2.1785614E-003 -6.7091814E-003  
-2.7488166E-002 3.1889387E-003 -7.0358460E-003  
-2.8915503E-002 3.4376105E-003 -7.9952200E-003  
-3.3474683E-002 9.3735192E-003 -9.7068130E-003  
-3.0357866E-002 3.2513008E-005 -1.6728552E-002  
1.6601006E-002 1.1854498E-002 -4.2524772E-003  
1.4906603E-002 1.0881471E-002 -6.2090244E-003  
1.3042054E-002 1.0204433E-002 -7.8980989E-003  
1.1359171E-002 9.9582053E-003 -9.7015231E-003  
9.6962496E-003 1.0048202E-002 -1.1431859E-002  
7.9516033E-003 1.0386527E-002 -1.2966643E-002  
6.2094397E-003 1.0991609E-002 -1.4396581E-002  
4.3855555E-003 1.1906118E-002 -1.5615875E-002  
2.4130077E-003 1.3083985E-002 -1.6548853E-002  
4.2073903E-004 1.4542797E-002 -1.7384743E-002  
-1.5296417E-003 1.6571834E-002 -1.7781525E-002  
-3.3883035E-003 1.8545912E-002 -1.7864201E-002  
-5.0518208E-003 2.0536824E-002 -1.7752417E-002  
-6.6036814E-003 2.2457805E-002 -1.7365487E-002  
-8.0450234E-003 2.4309408E-002 -1.6712161E-002  
-9.4027418E-003 2.6079689E-002 -1.5755777E-002  
-1.0648185E-002 2.7822490E-002 -1.4570008E-002  
-1.1855792E-002 2.9431770E-002 -1.3075917E-002  
-1.3024178E-002 3.0833627E-002 -1.1219468E-002  
-1.4219582E-002 3.2112132E-002 -9.2170898E-003  
-1.5464771E-002 3.3140606E-002 -7.0985644E-003  
-1.6802725E-002 3.3909787E-002 -4.9397483E-003  
-1.8217133E-002 3.4474174E-002 -2.7200688E-003  
-1.9784738E-002 3.4777789E-002 -4.5692090E-004  
-2.1521999E-002 3.4696545E-002 1.8488414E-003  
-2.3328538E-002 3.4435366E-002 4.2905776E-003  
-2.5289798E-002 3.3746042E-002 6.7240962E-003  
-2.7364643E-002 3.2686617E-002 9.1465215E-003  
-2.9669576E-002 3.1260801E-002 1.1525708E-002  
-3.1903719E-002 2.9498164E-002 1.3620240E-002  
-3.3998996E-002 2.7308269E-002 1.5275671E-002  
-3.6008533E-002 2.4934252E-002 1.6654231E-002  
-3.8034108E-002 2.2399824E-002 1.7850923E-002  
-4.0023039E-002 1.9605020E-002 1.8795557E-002  
-4.1800674E-002 1.6418966E-002 1.9256569E-002  
-4.3525624E-002 1.3007884E-002 1.9445244E-002  
-4.5003950E-002 9.3074648E-003 1.9203404E-002  
-4.6390058E-002 3.8779990E-003 1.8067751E-002  
-4.6878660E-002 -1.1730419E-003 1.6772787E-002  
-4.6375766E-002 -5.7104585E-003 1.5373178E-002  
-4.5395089E-002 -9.8197483E-003 1.4162749E-002  
-4.3713847E-002 -1.3472538E-002 1.2989727E-002  
-4.1420747E-002 -1.6709964E-002 1.1852892E-002  
-3.8501849E-002 -1.9589187E-002 1.0785700E-002

-3.4790425E-002 -2.1944193E-002 9.6980775E-003  
-3.0277634E-002 -2.3643713E-002 8.5658116E-003  
-2.6765306E-002 -2.4410205E-002 7.8082499E-003  
-2.3398966E-002 -2.4520934E-002 6.8840444E-003  
-2.0319557E-002 -2.4272467E-002 5.9474324E-003  
-1.7578598E-002 -2.3481548E-002 5.0052976E-003  
-1.5190425E-002 -2.2291259E-002 4.0393364E-003  
-1.3026097E-002 -2.0964237E-002 3.0363837E-003  
-1.1188651E-002 -1.9238300E-002 2.0183730E-003  
-9.4879511E-003 -1.7377704E-002 9.0328834E-004  
-8.1222113E-003 -1.5088185E-002 -2.3065557E-004  
-7.1920293E-003 -1.2415920E-002 -1.5465333E-003  
-6.6792305E-003 -9.7192569E-003 -2.6217255E-003  
-6.6182673E-003 -7.0417987E-003 -3.4805117E-003  
-6.9527348E-003 -4.3715400E-003 -4.1159714E-003  
-7.5891011E-003 -1.7390357E-003 -4.6253162E-003  
-8.5609114E-003 9.3154390E-004 -4.9648155E-003  
-9.9421437E-003 3.6211602E-003 -5.1119970E-003  
-1.1772824E-002 6.2840981E-003 -5.0593244E-003  
-1.4163806E-002 8.7716651E-003 -4.7871734E-003  
-1.6283155E-002 1.0958097E-002 -4.4844753E-003  
-1.8550906E-002 1.2725631E-002 -4.1442484E-003  
-2.0951832E-002 1.4044163E-002 -3.7731457E-003  
-2.3407899E-002 1.5051344E-002 -3.3707055E-003  
-2.5999465E-002 1.5690038E-002 -2.9298517E-003  
-2.8747523E-002 1.5820657E-002 -2.4369664E-003  
-3.1659619E-002 1.5554343E-002 -1.9081821E-003  
-3.4723075E-002 1.4705821E-002 -1.3501159E-003  
-3.7825727E-002 1.3291263E-002 -7.6491031E-004  
-4.0595324E-002 1.1235788E-002 -3.6871435E-004  
-4.2739435E-002 8.9105057E-003 -4.2459355E-005  
-4.4405952E-002 6.5055552E-003 2.1183433E-004  
-4.5545995E-002 3.9769122E-003 4.1609214E-004  
-4.6169735E-002 1.3412560E-003 5.2400869E-004  
-4.6354328E-002 -1.3877154E-003 5.5821118E-004  
-4.6185523E-002 -4.2526652E-003 5.6405255E-004  
-4.5427709E-002 -7.2674096E-003 4.8881037E-004  
-4.3983297E-002 -1.0250834E-002 3.4988805E-004  
-4.2356429E-002 -1.2542826E-002 -1.2142893E-004  
-4.0494695E-002 -1.4421474E-002 -6.4652707E-004  
-3.8556157E-002 -1.5999476E-002 -1.1806157E-003  
-3.6515110E-002 -1.7348787E-002 -1.8138345E-003  
-3.4292437E-002 -1.8325462E-002 -2.4671651E-003  
-3.1925057E-002 -1.8950465E-002 -3.1850950E-003  
-2.9438788E-002 -1.9388907E-002 -3.9715322E-003  
-2.6776368E-002 -1.9459505E-002 -4.8165276E-003  
-2.4023042E-002 -1.9000067E-002 -5.6882827E-003  
-1.8637202E-002 -1.5492414E-002 -8.9864756E-003  
-1.5874083E-002 -1.0306630E-002 -1.1399071E-002  
-1.5321805E-002 -5.9494555E-003 -1.2756658E-002  
-1.5931555E-002 -2.6578127E-003 -1.3660707E-002  
-1.7387570E-002 1.1638951E-004 -1.4508927E-002  
-1.9966413E-002 2.7431385E-003 -1.5477098E-002  
-2.4400672E-002 5.1443053E-003 -1.6182214E-002  
-3.1121940E-002 6.7096940E-003 -1.5729634E-002  
-3.8237143E-002 6.0850872E-003 -1.2643903E-002  
-3.7136435E-002 -3.4170999E-003 -1.2440370E-002  
-3.8142889E-002 -1.1314581E-002 -1.3923491E-002  
-3.5639032E-002 -1.5075273E-002 -1.2476753E-002  
-3.4227774E-002 -1.6059030E-002 -1.2257437E-002

-3.3271188E-002 -1.6399477E-002 -1.2962057E-002  
-3.2764922E-002 -1.5925698E-002 -1.4213141E-002  
-3.2525463E-002 -1.3555429E-002 -1.6397647E-002  
-3.1595585E-002 -7.4213186E-003 -1.8610850E-002  
6.1925856E-003 -1.5613000E-002 -6.3656714E-003  
4.0474940E-003 -1.3729133E-002 -5.2701822E-003  
1.9132677E-003 -1.1933086E-002 -4.8055148E-003  
5.0202527E-005 -1.0135136E-002 -4.5382920E-003  
-1.3642974E-003 -8.2744275E-003 -4.4261405E-003  
-2.2179132E-003 -6.2762423E-003 -4.3790070E-003  
-2.6187842E-003 -4.1759119E-003 -4.4343506E-003  
-2.7072260E-003 -2.0686041E-003 -4.7137053E-003  
-2.4999645E-003 9.2028046E-005 -5.2186609E-003  
-2.1729322E-003 2.1777357E-003 -6.2831215E-003  
-2.5142657E-003 3.9766090E-003 -9.2738738E-003  
-3.5133260E-003 5.4189114E-003 -1.2393145E-002  
-4.6288705E-003 7.2558242E-003 -1.4701532E-002  
-5.9333344E-003 9.3961153E-003 -1.6523814E-002  
-7.4954902E-003 1.1435498E-002 -1.7156420E-002  
-9.3444234E-003 1.3759312E-002 -1.7673734E-002  
-1.1626085E-002 1.6330445E-002 -1.8046935E-002  
-1.4065169E-002 1.8988944E-002 -1.7400573E-002  
-1.6510038E-002 2.1863608E-002 -1.5845887E-002  
-1.9124513E-002 2.4069025E-002 -1.3198794E-002  
-2.1418500E-002 2.5673460E-002 -1.0263865E-002  
-2.3542664E-002 2.6665531E-002 -7.2396383E-003  
-2.5599849E-002 2.7040519E-002 -4.2129504E-003  
-2.7790733E-002 2.6742629E-002 -1.3335753E-003  
-3.0170647E-002 2.5759768E-002 1.3686146E-003  
-3.2695833E-002 2.4073860E-002 3.9578373E-003  
-3.5469101E-002 2.1721629E-002 6.3009661E-003  
-3.8459765E-002 1.8718226E-002 8.3783636E-003  
-4.0558595E-002 1.5593620E-002 9.1819615E-003  
-4.2439201E-002 1.2468776E-002 9.5552620E-003  
-4.3973143E-002 9.3392941E-003 9.6482690E-003  
-4.5096188E-002 6.1780122E-003 9.5022045E-003  
-4.5859956E-002 2.9978116E-003 9.1063000E-003  
-4.6123575E-002 -2.7254837E-004 8.5804220E-003  
-4.5891906E-002 -3.6294460E-003 7.9202466E-003  
-4.5039407E-002 -7.0596945E-003 7.2854639E-003  
-4.3589018E-002 -1.0449969E-002 6.6750779E-003  
-4.1783569E-002 -1.3284615E-002 5.9797113E-003  
-3.9685998E-002 -1.5662038E-002 5.3474459E-003  
-3.7344727E-002 -1.7542017E-002 4.7332991E-003  
-3.4884869E-002 -1.8980223E-002 4.0148350E-003  
-3.2315466E-002 -1.9996593E-002 3.1523983E-003  
-2.9572263E-002 -2.0554064E-002 2.2491696E-003  
-2.6721151E-002 -2.0717191E-002 1.1985222E-003  
-2.3712108E-002 -2.0425918E-002 8.5875608E-005  
-2.0631274E-002 -1.9819290E-002 -1.3247821E-003  
-1.7980362E-002 -1.8349070E-002 -2.9913493E-003  
-1.5768855E-002 -1.6565747E-002 -4.3744321E-003  
-1.4063067E-002 -1.4445695E-002 -5.3706311E-003  
-1.2890948E-002 -1.2253490E-002 -6.5486510E-003  
-1.2291592E-002 -9.7908698E-003 -7.4664416E-003  
-1.2120498E-002 -7.1826885E-003 -8.5053407E-003  
-1.2500650E-002 -4.3102085E-003 -9.3233469E-003  
-1.3412415E-002 -1.2216160E-003 -1.0051948E-002  
-1.4881879E-002 2.0816531E-003 -1.0434720E-002  
-1.6875974E-002 4.8741086E-003 -1.0644781E-002

-1.9013799E-002 7.1570484E-003 -1.0543835E-002  
-2.1249771E-002 8.9534498E-003 -1.0324486E-002  
-2.3575351E-002 1.0268091E-002 -9.9753100E-003  
-2.5981972E-002 1.1066533E-002 -9.4889992E-003  
-2.8464350E-002 1.1341384E-002 -8.8690043E-003  
-3.1065889E-002 1.1187499E-002 -8.2876288E-003  
-3.3883281E-002 1.0624773E-002 -7.8213247E-003  
-3.6766193E-002 9.5458976E-003 -7.1441470E-003  
-3.8827816E-002 8.4135093E-003 -6.6357198E-003  
-4.0549214E-002 7.0732297E-003 -6.1838280E-003  
-4.1957080E-002 5.5047167E-003 -5.8975957E-003  
-4.2960709E-002 3.6701060E-003 -5.6496229E-003  
-4.3631194E-002 1.6029144E-003 -5.5332643E-003  
-4.4022097E-002 -6.9857974E-004 -5.5805201E-003  
-4.4004973E-002 -3.2518268E-003 -5.7073900E-003  
-4.3742110E-002 -6.0379704E-003 -5.9828059E-003  
-4.2826877E-002 -9.0147085E-003 -6.0281086E-003  
-4.1552383E-002 -1.1214683E-002 -6.2266045E-003  
-3.9929397E-002 -1.2993513E-002 -6.3028190E-003  
-3.8185878E-002 -1.4382455E-002 -6.4741211E-003  
-3.6441328E-002 -1.5504995E-002 -6.8558279E-003  
-3.4663435E-002 -1.6369338E-002 -7.4046566E-003  
-3.2777709E-002 -1.6897229E-002 -8.0602993E-003  
-3.0847312E-002 -1.7207521E-002 -8.9160339E-003  
-2.8819382E-002 -1.7136290E-002 -9.8813606E-003  
-2.6718573E-002 -1.6718842E-002 -1.0966804E-002  
-2.3166291E-002 -1.3736091E-002 -1.4194214E-002  
-2.0594364E-002 -9.9583470E-003 -1.5747271E-002  
-1.9488388E-002 -6.5372170E-003 -1.6048067E-002  
-1.9510234E-002 -3.8535450E-003 -1.6390826E-002  
-2.0573641E-002 -1.7216035E-003 -1.6719447E-002  
-2.2626560E-002 6.1570208E-005 -1.6891054E-002  
-2.5789390E-002 1.6260890E-003 -1.7842022E-002  
-3.0757492E-002 2.5279373E-003 -1.7474332E-002  
-3.6313894E-002 2.4553905E-003 -1.5227908E-002  
-3.6658854E-002 -2.5867434E-003 -1.7078070E-002  
-3.6416883E-002 -7.2469750E-003 -1.7585845E-002  
-3.5062660E-002 -1.0043533E-002 -1.6144033E-002  
-3.4356162E-002 -1.1724810E-002 -1.6369157E-002  
-3.3612658E-002 -1.2133084E-002 -1.6744546E-002  
-3.2888122E-002 -1.1235452E-002 -1.7317827E-002  
-3.2171762E-002 -8.9352730E-003 -1.8070856E-002  
-3.1546595E-002 -5.1838953E-003 -1.9154932E-002  
1.0896556E-002 -2.1205678E-003 1.9951266E-002  
1.5738456E-002 -4.0720560E-003 2.2032943E-002  
2.0385556E-002 -5.7374069E-003 2.3508017E-002  
2.5010627E-002 -7.1876772E-003 2.3899723E-002  
2.8874687E-002 -8.3823103E-003 2.5870196E-002  
3.2670682E-002 -9.5645555E-003 2.6488939E-002  
3.6297155E-002 -1.0028057E-002 2.6698071E-002  
3.9729846E-002 -1.0873840E-002 2.7361076E-002  
4.2925670E-002 -1.1171090E-002 2.6956456E-002  
4.5652913E-002 -1.1553552E-002 2.5879609E-002
